# Supplementary material for: Deciphering deep-sea chemosynthetic symbiosis by single-nucleus RNA-sequencing
Source: eLife. 2024 Aug 5;12:RP88294. doi: 10.7554/eLife.88294 (PMC11299980; doi:10.7554/eLife.88294)
Supplement: Supplementary file 1. — (a) Summary statistics of single-cell data information, including numbers and percentages of cells and numbers of available genes per cluster in each sample individually and in all three pieces combined. (b) Identified cell markers of the supportive cells, including the inter lamina cell, the basal membrane cell 1, the basal membrane cell 2, and the mucus cell. (c) Identified cell markers of the ciliary cells, including the apical ridge ciliary cell, the food grove ciliary cell, the lateral ciliary cell, the smooth muscle cell, and the intercalary cell. (d) Identified cell markers of the proliferation cells, including the posterior end budding zone, the dorsal end proliferation cell, and the ventral end proliferation cell. (e) Identified cell markers of the bacteriocyte. (f) Cell cluster-specific differentially expressed genes among the three deep-sea in situ treatments, the inter lamina cell. (g) Cell cluster-specific differentially expressed genes among the three deep-sea in situ treatments, the basal membrane cell 1. (h) Cell cluster-specific differentially expressed genes among the three deep-sea in situ treatments, the basal membrane cell 2. (i) Cell cluster-specific differentially expressed genes among the three deep-sea in situ treatments, the mucus cell. (j) Cell cluster-specific differentially expressed genes among the three deep-sea in situ treatments, the apical ridge ciliary cell. (k) Cell cluster-specific differentially expressed genes among the three deep-sea in situ treatments, the food grove ciliary cell. (l) Cell cluster-specific differentially expressed genes among the three deep-sea in situ treatments, the lateral ciliary cell. (m) Cell cluster-specific differentially expressed genes among the three deep-sea in situ treatments, the smooth muscle cell. (n) Cell cluster-specific differentially expressed genes among the three deep-sea in situ treatments, the intercalary cell. (o) Cell cluster-specific differentially expressed genes among the three de [file elife-88294-supp1.xlsx]

## Sheet: Supplementary File 1a
Supplementary File 1a. Summary statistics of single-cell data information including numbers and percentages of cells, and numbers of available genes per cluster in each sample individually, and in all three samples combined.
	Group number	GP0	GP1	GP2	GP3	GP4	GP5	GP6	GP7	GP8	GP9	GP10	GP11	GP12	GP13
	cell names	posterior end budding zone cell	Ventral end proliferation cell	Inter lamina cell	Bacteriocytes	Apical ridge ciliary cell	Lateral ciliary cell	Intercalary cell	Mucus cell	Ambiguous	Basal membrane cell 1	Basal membrane cell 2	Dorsal end proliferation cell	Smooth musle cell	Food grove ciliary cell	Sum
	cell name abbriviation	PEBZ	VEPC	ILC	BC	ARC	LCC	ICC	MCC	AMB	BMC1	BMC2	DEPC	SMC	FGC
all	no. of cells	14633	9749	9818	10069	3803	3629	1673	1555	1386	1304	945	766	473	456	60259
all	percentage of cells	0.2428	0.1618	0.1629	0.1671	0.0631	0.0602	0.0278	0.0258	0.023	0.0216	0.0157	0.0127	0.0078	0.0076	1
all	number of genes	13554	13538	13501	13374	13516	13262	13554	13551	12773	13494	12841	13260	12844	13242
Fanmaoqu	no. of cells	1132	2750	3507	487	428	244	327	107	225	191	165	59	63	32	9717
Fanmaoqu	percentage of cells	0.1165	0.283	0.3609	0.0501	0.044	0.0251	0.0337	0.011	0.0232	0.0197	0.017	0.0061	0.0065	0.0033	1
Fanmaoqu	number of genes	8596	8528	8465	6786	8353	6808	8596	8575	5236	8046	6646	6293	4549	6805
Reconstitution	no. of cells	7930	3849	2941	5702	2204	2183	863	642	651	686	289	492	226	270	28928
Reconstitution	percentage of cells	0.2741	0.1331	0.1017	0.1971	0.0762	0.0755	0.0298	0.0222	0.0225	0.0237	0.01	0.017	0.0078	0.0093	1
Reconstitution	number of genes	12474	12575	12562	12013	12575	12573	12574	12575	12575	12413	11769	12392	11493	12461
Starvation	no. of cells	5571	3150	3370	3880	1171	1202	483	806	510	427	491	215	184	154	21614
Starvation	percentage of cells	0.2577	0.1457	0.1559	0.1795	0.0542	0.0556	0.0223	0.0373	0.0236	0.0198	0.0227	0.0099	0.0085	0.0071	1
Starvation	number of genes	11549	11549	11103	11536	11549	11481	11387	10478	11544	10581	11549	11194	10949	11022

## Sheet: Supplementary File 1b
Supplementary File 1b. Identified cell markers of the supportive cells, including the inter lamina cell, the basal membrane cell 1, the basal membrane cell 2, and the mucus cell.
	p_val	avg_log2FC	pct.1	pct.2	p_val_adj	cluster	gene	Description
1	0	2.29679	0.638	0.297	0	Inter lamina cell	Bpl_scaf_17465-2.8	collagen alpha-1(II) chain isoform X1
2	0	2.21381	0.637	0.288	0	Inter lamina cell	Bpl_scaf_11625-1.11	fibril-forming collagen alpha chain-like
3	0	2.12929	0.745	0.465	0	Inter lamina cell	Bpl_scaf_38266-13.9	Collagen alpha-5(VI) chain
4	0	1.53391	0.569	0.227	0	Inter lamina cell	Bpl_scaf_38266-12.5	Collagen alpha-5(VI) chain
5	0	1.18851	0.269	0.082	0	Inter lamina cell	Bpl_scaf_32538-10.8	Serine threonine- kinase ULK4
6	0	1.14844	0.669	0.344	0	Inter lamina cell	Bpl_scaf_48581-0.7	PREDICTED: uncharacterized protein LOC105328788 isoform X2
7	0	1.10313	0.533	0.205	0	Inter lamina cell	Bpl_scaf_31119-4.18	perlucin 6
8	0	1.06031	0.352	0.172	0	Inter lamina cell	Bpl_scaf_15801-5.10	titin-like isoform X1
9	0	1.04086	0.451	0.222	0	Inter lamina cell	Bpl_scaf_20338-0.1	, partial
10	0	1.01848	0.378	0.122	0	Inter lamina cell	Bpl_scaf_40907-1.6	collagen alpha-1(XI) chain isoform X1
11	0	0.920768	0.615	0.366	0	Inter lamina cell	Bpl_scaf_63703-4.35	MT22_MYTED ame: Full=Metallothionein 20-II Short=MT-20-II
12	0	0.837103	0.51	0.224	0	Inter lamina cell	Bpl_scaf_44465-0.53	cytoplasmic actin
13	0	0.765697	0.502	0.241	0	Inter lamina cell	Bpl_scaf_58053-0.13	---NA---
14	0	0.760436	0.352	0.11	0	Inter lamina cell	Bpl_scaf_18893-3.6	paramyosin-like isoform X2
15	0	0.723559	0.576	0.333	0	Inter lamina cell	Bpl_scaf_22242-2.44	tubulin alpha-1A chain-like, partial
16	0	0.701732	0.898	0.783	0	Inter lamina cell	Bpl_scaf_43962-2.9	elongation factor 1 alpha
17	0	0.679436	0.428	0.189	0	Inter lamina cell	Bpl_scaf_6090-3.8	peptidyl-prolyl cis-trans isomerase-like
18	0	0.665617	0.267	0.074	0	Inter lamina cell	Bpl_scaf_12540-1.42	Myosin heavy chain, striated muscle, partial
19	0	0.644023	0.828	0.681	0	Inter lamina cell	Bpl_scaf_11851-1.32	60S ribosomal L7a-like
20	0	0.623462	0.258	0.098	0	Inter lamina cell	Bpl_scaf_54651-5.17	PREDICTED: myophilin-like
21	0	0.61918	0.459	0.255	0	Inter lamina cell	Bpl_scaf_158-0.9	C-type lectin 9
22	0	0.613465	0.487	0.235	0	Inter lamina cell	Bpl_scaf_1371-2.4	Zonadhesin
23	0	0.597779	0.85	0.721	0	Inter lamina cell	Bpl_scaf_56862-1.23	ribosomal L32
24	0	0.594626	0.825	0.693	0	Inter lamina cell	Bpl_scaf_58007-2.15	40S ribosomal S20
25	0	0.593627	0.887	0.809	0	Inter lamina cell	Bpl_scaf_28870-1.8	translation elongation factor 2
26	0	0.586977	0.924	0.861	0	Inter lamina cell	Bpl_scaf_49180-1.5	myotubularin-related 13-like isoform X4
27	0	0.584014	0.866	0.744	0	Inter lamina cell	Bpl_scaf_56354-8.14	40S ribosomal S26
28	0	0.575948	0.285	0.092	0	Inter lamina cell	Bpl_scaf_59651-0.3	---NA---
29	0	0.573813	0.82	0.681	0	Inter lamina cell	Bpl_scaf_59681-3.28	60S ribosomal L19
30	0	0.573156	0.758	0.587	0	Inter lamina cell	Bpl_scaf_44032-0.1	60S ribosomal L13A
31	0	0.573074	0.277	0.08	0	Inter lamina cell	Bpl_scaf_29674-9.13	alpha macroglobulin
32	0	0.572043	0.254	0.105	0	Inter lamina cell	Bpl_scaf_14002-1.10	baculoviral IAP repeat-containing 7-A-like
33	0	0.571047	0.756	0.606	0	Inter lamina cell	Bpl_scaf_7842-4.11	40S ribosomal S2
34	0	0.567551	0.717	0.545	0	Inter lamina cell	Bpl_scaf_4947-1.6	---NA---
35	0	0.56447	0.81	0.673	0	Inter lamina cell	Bpl_scaf_63854-9.11	60S ribosomal L8
36	0	0.563012	0.777	0.635	0	Inter lamina cell	Bpl_scaf_51690-1.23	40S ribosomal S4-like
37	0	0.560599	0.698	0.515	0	Inter lamina cell	Bpl_scaf_38266-3.33	60S ribosomal L3
38	0	0.55742	0.706	0.53	0	Inter lamina cell	Bpl_scaf_30366-9.12	40S ribosomal S15
39	0	0.556412	0.79	0.65	0	Inter lamina cell	Bpl_scaf_4916-0.9	ribosomal L44
40	0	0.550105	0.664	0.479	0	Inter lamina cell	Bpl_scaf_20076-0.1	40S ribosomal S8-like
41	0	0.547621	0.773	0.62	0	Inter lamina cell	Bpl_scaf_13236-2.10	Soma ferritin
42	0	0.544374	0.729	0.558	0	Inter lamina cell	Bpl_scaf_15281-0.21	60S ribosomal L9
43	0	0.541442	0.838	0.716	0	Inter lamina cell	Bpl_scaf_46488-6.34	ribosomal S25
44	0	0.539086	0.3	0.142	0	Inter lamina cell	Bpl_scaf_61985-5.10	filamin -1
45	0	0.537871	0.798	0.674	0	Inter lamina cell	Bpl_scaf_60144-0.6	40S ribosomal S27-like
46	0	0.53344	0.826	0.669	0	Inter lamina cell	Bpl_scaf_30175-7.5	Y-Box factor
47	0	0.533143	0.724	0.556	0	Inter lamina cell	Bpl_scaf_34444-0.30	40S ribosomal S6
48	0	0.528141	0.687	0.517	0	Inter lamina cell	Bpl_scaf_47521-0.15	60S acidic ribosomal P2
49	0	0.527784	0.905	0.827	0	Inter lamina cell	Bpl_scaf_2519-1.14	40S ribosomal S12-like
50	0	0.524939	0.261	0.076	0	Inter lamina cell	Bpl_scaf_39475-6.11	hypothetical protein CGI_10014469
51	0	0.524719	0.697	0.535	0	Inter lamina cell	Bpl_scaf_37494-0.7	60S ribosomal L23a-like
52	0	0.523305	0.71	0.541	0	Inter lamina cell	Bpl_scaf_32549-2.1	40S ribosomal S5
53	0	0.520882	0.75	0.589	0	Inter lamina cell	Bpl_scaf_54665-10.11	60S ribosomal L18
54	0	0.520723	0.3	0.103	0	Inter lamina cell	Bpl_scaf_50282-0.9	NADPH-dependent aldehyde reductase ARI1-like isoform X1
55	0	0.51474	0.773	0.628	0	Inter lamina cell	Bpl_scaf_20231-3.4	heat shock cognate 70
56	0	0.512716	0.719	0.555	0	Inter lamina cell	Bpl_scaf_54280-0.16	40S ribosomal S3a-like
57	0	0.51271	0.65	0.469	0	Inter lamina cell	Bpl_scaf_61662-4.14	60S ribosomal L15
58	0	0.508957	0.87	0.781	0	Inter lamina cell	Bpl_scaf_21636-2.6	60S acidic ribosomal P1
59	0	0.505704	0.507	0.309	0	Inter lamina cell	Bpl_scaf_2668-3.6	S-adenosylhomocysteine hydrolase
60	0	0.502357	0.403	0.181	0	Inter lamina cell	Bpl_scaf_3530-9.35	---NA---
61	0	0.494291	0.631	0.448	0	Inter lamina cell	Bpl_scaf_50950-1.7	40S ribosomal SA
62	0	0.480973	0.768	0.612	0	Inter lamina cell	Bpl_scaf_10588-4.10	60S ribosomal L4
63	0	0.480392	0.308	0.115	0	Inter lamina cell	Bpl_scaf_8163-0.13	PREDICTED: uncharacterized protein LOC105337979 isoform X1
64	0	0.477637	0.79	0.652	0	Inter lamina cell	Bpl_scaf_3471-3.11	60S ribosomal L13-like
65	0	0.473411	0.535	0.339	0	Inter lamina cell	Bpl_scaf_13468-0.8	40S ribosomal S3
66	0	0.464865	0.266	0.093	0	Inter lamina cell	Bpl_scaf_64398-0.3	---NA---
67	6.51e-298	0.495539	0.615	0.431	8.83e-294	Inter lamina cell	Bpl_scaf_15478-2.4	60S acidic ribosomal P0
68	2.7e-297	0.506004	0.666	0.493	3.66e-293	Inter lamina cell	Bpl_scaf_3150-3.28	40S ribosomal S10-like
69	1.18e-296	0.482037	0.677	0.503	1.6e-292	Inter lamina cell	Bpl_scaf_30260-2.32	ribosomal L12
70	1.37e-295	0.47872	0.759	0.619	1.86e-291	Inter lamina cell	Bpl_scaf_51173-0.6	60S ribosomal L36-like
71	7.34e-293	0.496017	0.698	0.54	9.96e-289	Inter lamina cell	Bpl_scaf_54665-12.14	ribosomal L34
72	2.5e-288	0.500493	0.668	0.498	3.38e-284	Inter lamina cell	Bpl_scaf_13042-1.41	ribosomal L11
73	1.49e-286	0.523998	0.725	0.585	2.02e-282	Inter lamina cell	Bpl_scaf_20125-4.6	Ornithine decarboxylase antizyme 1
74	1.11e-285	0.480017	0.721	0.564	1.51e-281	Inter lamina cell	Bpl_scaf_53568-3.4	60S ribosomal L23
75	5.79e-281	0.479488	0.582	0.399	7.84e-277	Inter lamina cell	Bpl_scaf_8121-1.3	60S ribosomal L10-like
76	7.64e-281	0.44388	0.489	0.305	1.03e-276	Inter lamina cell	Bpl_scaf_3428-3.15	40S ribosomal S13
77	3.4e-278	0.503385	0.727	0.583	4.6e-274	Inter lamina cell	Bpl_scaf_32527-1.23	translationally-controlled tumor
78	5.88e-274	0.506769	0.491	0.316	7.96e-270	Inter lamina cell	Bpl_scaf_24592-4.10	eukaryotic initiation factor 4A-I-like
79	2.8e-267	0.46595	0.468	0.291	3.8e-263	Inter lamina cell	Bpl_scaf_45124-0.16	S-adenosylmethionine synthase isoform type-2-like isoform X1
80	2.69e-266	0.509547	0.616	0.45	3.65e-262	Inter lamina cell	Bpl_scaf_17778-1.40	actin-depolymerizing factor 6
81	2.34e-260	0.430378	0.534	0.354	3.17e-256	Inter lamina cell	Bpl_scaf_13698-0.10	60S ribosomal L21-like
82	2.23e-259	0.452077	0.672	0.507	3.02e-255	Inter lamina cell	Bpl_scaf_53185-11.12	ribosomal L28
83	2.2e-254	0.445974	0.682	0.525	2.98e-250	Inter lamina cell	Bpl_scaf_2201-13.26	40S ribosomal S23
84	4.24e-254	0.440675	0.64	0.469	5.75e-250	Inter lamina cell	Bpl_scaf_5538-5.4	ribosomal l17
85	1.19e-248	0.495546	0.667	0.522	1.61e-244	Inter lamina cell	Bpl_scaf_45534-3.10	Nucleolar GTP-binding 1
86	3.06e-247	0.433468	0.624	0.456	4.15e-243	Inter lamina cell	Bpl_scaf_54412-8.12	40S ribosomal S19-like
87	4.44e-247	0.455847	0.72	0.577	6.01e-243	Inter lamina cell	Bpl_scaf_53163-0.1	cellular nucleic acid-binding isoform X1
88	3.26e-245	0.441151	0.582	0.411	4.42e-241	Inter lamina cell	Bpl_scaf_29079-0.5	40S ribosomal S11
89	1.49e-243	0.436367	0.529	0.357	2.03e-239	Inter lamina cell	Bpl_scaf_9015-1.10	40S ribosomal S17-like
90	2.38e-238	0.485686	0.7	0.569	3.22e-234	Inter lamina cell	Bpl_scaf_54410-1.12	polyadenylate-binding 4-like
91	1.5e-237	0.439497	0.645	0.484	2.04e-233	Inter lamina cell	Bpl_scaf_47430-3.10	ribosomal L7
92	1.7e-236	0.443715	0.543	0.373	2.31e-232	Inter lamina cell	Bpl_scaf_45479-0.6	60S ribosomal L37a
93	1.23e-234	0.467147	0.569	0.4	1.66e-230	Inter lamina cell	Bpl_scaf_8329-6.29	MAP kinase-interacting serine threonine- kinase 1-like isoform X1
94	5.32e-230	0.429806	0.601	0.438	7.21e-226	Inter lamina cell	Bpl_scaf_31673-0.15	ribosomal S7
95	3.39e-227	0.460635	0.369	0.22	4.59e-223	Inter lamina cell	Bpl_scaf_2518-0.1	---NA---
96	3.76e-227	0.436153	0.733	0.609	5.09e-223	Inter lamina cell	Bpl_scaf_26510-4.12	60S ribosomal L35
97	7.13e-219	0.425614	0.721	0.587	9.66e-215	Inter lamina cell	Bpl_scaf_52314-3.23	60S ribosomal L38
98	1.75e-210	0.510171	0.263	0.142	2.37e-206	Inter lamina cell	Bpl_scaf_35290-1.7	flocculation FLO10-like
99	1.22e-201	0.414551	0.672	0.53	1.66e-197	Inter lamina cell	Bpl_scaf_52731-7.15	elongation factor 1-gamma-like, partial
100	4.39e-200	0.408193	0.709	0.582	5.95e-196	Inter lamina cell	Bpl_scaf_14738-4.9	heterogeneous nuclear ribonucleo Q isoform X3
101	1.44e-198	0.444761	0.636	0.497	1.95e-194	Inter lamina cell	Bpl_scaf_5538-4.10	TPM_PERVI ame: Full=Tropomyosin
102	2.14e-170	1.43177	0.535	0.435	2.9e-166	Inter lamina cell	Bpl_scaf_15801-3.45	titin-like isoform X1
103	1.45e-163	0.515568	0.425	0.298	1.96e-159	Inter lamina cell	Bpl_scaf_57259-5.3	cytoplasmic intermediate filament A
104	3.01e-63	0.717429	0.46	0.404	4.08e-59	Inter lamina cell	Bpl_scaf_22849-1.5	---NA---
105	6.92e-50	0.522792	0.425	0.361	9.38e-46	Inter lamina cell	Bpl_scaf_19372-2.10	golgin subfamily B member 1-like
106	0	3.469	0.802	0.058	0	Basal membrane cell 1	Bpl_scaf_27638-4.18	SCO-spondin-like, partial
107	0	3.02651	0.833	0.263	0	Basal membrane cell 1	Bpl_scaf_1371-2.4	Zonadhesin
108	0	2.72947	0.803	0.204	0	Basal membrane cell 1	Bpl_scaf_3530-9.35	---NA---
109	0	1.92063	0.788	0.376	0	Basal membrane cell 1	Bpl_scaf_58266-2.19	A-kinase anchor 9-like
110	0	1.77452	0.539	0.011	0	Basal membrane cell 1	Bpl_scaf_6938-0.9	---NA---
111	0	1.55951	0.433	0.019	0	Basal membrane cell 1	Bpl_scaf_31681-1.10	---NA---
112	0	1.40144	0.454	0.008	0	Basal membrane cell 1	Bpl_scaf_27638-4.22	---NA---
113	0	1.29001	0.426	0.009	0	Basal membrane cell 1	Bpl_scaf_9634-0.13	---NA---
114	0	1.2622	0.393	0.037	0	Basal membrane cell 1	Bpl_scaf_33261-0.8	voltage-dependent T-type calcium channel subunit alpha-1H-like isoform X1
115	0	0.875922	0.297	0.018	0	Basal membrane cell 1	Bpl_scaf_43601-0.13	Down syndrome cell adhesion molecule
116	0	0.850698	0.287	0.016	0	Basal membrane cell 1	Bpl_scaf_56879-1.2	3 beta-hydroxysteroid dehydrogenase Delta 5--
117	0	0.767848	0.258	0.016	0	Basal membrane cell 1	Bpl_scaf_3530-9.37	---NA---
118	1.92e-300	1.96027	0.639	0.276	2.61e-296	Basal membrane cell 1	Bpl_scaf_58053-0.13	---NA---
119	1.25e-292	1.59918	0.607	0.227	1.7e-288	Basal membrane cell 1	Bpl_scaf_58948-1.5	anoctamin-8-like isoform X1
120	2.1e-265	1.07426	0.294	0.06	2.84e-261	Basal membrane cell 1	Bpl_scaf_27182-0.8	villin-1-like isoform X3
121	1.45e-202	1.82454	0.51	0.222	1.96e-198	Basal membrane cell 1	Bpl_scaf_6090-3.8	peptidyl-prolyl cis-trans isomerase-like
122	4.2e-143	1.1276	0.869	0.753	5.7e-139	Basal membrane cell 1	Bpl_scaf_14076-3.9	G patch domain-containing 8 isoform X3
123	2.57e-138	0.817443	0.29	0.094	3.49e-134	Basal membrane cell 1	Bpl_scaf_49383-1.13	polypeptide N-acetylgalactosaminyltransferase 5-like
124	2.98e-98	0.84323	0.337	0.148	4.03e-94	Basal membrane cell 1	Bpl_scaf_7293-3.7	FAM107B-like, partial
125	3.59e-82	1.30626	0.758	0.672	4.87e-78	Basal membrane cell 1	Bpl_scaf_47525-1.6	---NA---
126	8.37e-74	0.915128	0.494	0.322	1.13e-69	Basal membrane cell 1	Bpl_scaf_31501-17.32	cyclic AMP-responsive element-binding 3 2 isoform X1
127	2.28e-68	0.872222	0.635	0.495	3.1e-64	Basal membrane cell 1	Bpl_scaf_63617-2.38	scaffold attachment factor B2-like isoform X1
128	8.62e-56	0.748983	0.389	0.238	1.17e-51	Basal membrane cell 1	Bpl_scaf_44519-1.3	synaptotagmin-1-like isoform X1
129	1.5e-45	0.714868	0.403	0.262	2.04e-41	Basal membrane cell 1	Bpl_scaf_57007-3.16	myoferlin-like isoform X5
130	6.73e-42	0.75903	0.538	0.429	9.12e-38	Basal membrane cell 1	Bpl_scaf_64387-2.10	ribosome-binding 1-like isoform X5
131	1.55e-41	0.820937	0.268	0.146	2.1e-37	Basal membrane cell 1	Bpl_scaf_30977-2.7	PREDICTED: uncharacterized protein LOC105317678 isoform X4
132	5.95e-33	0.609335	0.291	0.181	8.06e-29	Basal membrane cell 1	Bpl_scaf_41576-4.15	cysteine and histidine-rich 1-like
133	4.9e-21	0.479776	0.804	0.793	6.65e-17	Basal membrane cell 1	Bpl_scaf_57006-3.25	Band 3
134	3.29e-20	0.482665	0.347	0.26	4.46e-16	Basal membrane cell 1	Bpl_scaf_3123-3.15	Dynein heavy chain, cytoplasmic
135	9.59e-20	0.559454	0.347	0.264	1.3e-15	Basal membrane cell 1	Bpl_scaf_16998-0.19	Transmembrane 19
136	2.45e-18	0.539306	0.527	0.474	3.32e-14	Basal membrane cell 1	Bpl_scaf_3539-1.26	microtubule-associated futsch-like isoform X17
137	1.6e-14	0.470912	0.533	0.486	2.16e-10	Basal membrane cell 1	Bpl_scaf_4833-2.22	apoptotic chromatin condensation inducer in the nucleus-like
138	1.83e-14	0.514265	0.347	0.28	2.48e-10	Basal membrane cell 1	Bpl_scaf_13642-5.8	sodium- and chloride-dependent glycine transporter 1-like
139	1.66e-12	0.44269	0.535	0.502	2.26e-08	Basal membrane cell 1	Bpl_scaf_36436-0.10	cell division cycle and apoptosis regulator 1 isoform X1
140	2.85e-11	0.438438	0.387	0.341	3.86e-07	Basal membrane cell 1	Bpl_scaf_59079-12.14	spectrin beta chain-like isoform X1
141	4.09e-09	0.502247	0.316	0.257	5.54e-05	Basal membrane cell 1	Bpl_scaf_40880-0.16	serine threonine- phosphatase 6 regulatory ankyrin repeat subunit B-like isoform X1
142	0	3.46677	0.902	0.152	0	Basal membrane cell 2	Bpl_scaf_7293-0.14	hemicentin-1-like, partial
143	0	2.98601	0.89	0.389	0	Basal membrane cell 2	Bpl_scaf_48581-0.7	PREDICTED: uncharacterized protein LOC105328788 isoform X2
144	0	2.36426	0.734	0.119	0	Basal membrane cell 2	Bpl_scaf_56162-7.6	threonine-rich GPI-anchored glyco
145	0	2.35605	0.666	0.11	0	Basal membrane cell 2	Bpl_scaf_33774-1.23	---NA---
146	0	2.14738	0.735	0.099	0	Basal membrane cell 2	Bpl_scaf_29375-1.23	---NA---
147	0	1.9169	0.493	0.117	0	Basal membrane cell 2	Bpl_scaf_59651-0.3	---NA---
148	0	1.69002	0.578	0.139	0	Basal membrane cell 2	Bpl_scaf_8163-0.13	PREDICTED: uncharacterized protein LOC105337979 isoform X1
149	0	1.62248	0.566	0.061	0	Basal membrane cell 2	Bpl_scaf_16371-0.16	PREDICTED: protein PIF-like
150	0	1.55936	0.552	0.031	0	Basal membrane cell 2	Bpl_scaf_38731-0.48	zonadhesin-like isoform X3
151	0	1.55146	0.545	0.146	0	Basal membrane cell 2	Bpl_scaf_56353-3.26	---NA---
152	0	1.5426	0.501	0.02	0	Basal membrane cell 2	Bpl_scaf_56162-7.21	c-binding -like
153	0	1.51532	0.505	0.115	0	Basal membrane cell 2	Bpl_scaf_64398-0.3	---NA---
154	0	1.51219	0.508	0.082	0	Basal membrane cell 2	Bpl_scaf_51350-0.19	Collagen alpha-1(XXI) chain, partial
155	0	1.41969	0.506	0.063	0	Basal membrane cell 2	Bpl_scaf_16371-0.14	Cartilage matrix
156	0	1.35262	0.488	0.07	0	Basal membrane cell 2	Bpl_scaf_1303-2.18	PIF-like isoform X2
157	0	1.30992	0.434	0.087	0	Basal membrane cell 2	Bpl_scaf_62453-5.2	PREDICTED: uncharacterized protein LOC105339482
158	0	1.304	0.44	0.091	0	Basal membrane cell 2	Bpl_scaf_63208-0.10	IgGFc-binding protein
159	0	1.25178	0.461	0.075	0	Basal membrane cell 2	Bpl_scaf_3387-5.47	cartilage matrix -like
160	0	1.191	0.435	0.012	0	Basal membrane cell 2	Bpl_scaf_38731-0.50	hemicentin-1 isoform X1
161	0	1.04428	0.344	0.05	0	Basal membrane cell 2	Bpl_scaf_57637-0.0	---NA---
162	0	1.00123	0.363	0.037	0	Basal membrane cell 2	Bpl_scaf_11110-0.2	mucin 17
163	0	0.95163	0.316	0.026	0	Basal membrane cell 2	Bpl_scaf_63013-1.18	BPTI Kunitz domain-containing 4-like
164	0	0.882928	0.331	0.013	0	Basal membrane cell 2	Bpl_scaf_38731-0.49	SCO-spondin-like isoform X5
165	0	0.746397	0.283	0.019	0	Basal membrane cell 2	Bpl_scaf_1303-2.15	Aldose 1-epimerase
166	6.98e-296	0.992365	0.329	0.055	9.46e-292	Basal membrane cell 2	Bpl_scaf_29497-1.11	chitin binding beak 1
167	5.04e-256	0.871029	0.311	0.055	6.83e-252	Basal membrane cell 2	Bpl_scaf_65520-1.6	hypothetical protein BRAFLDRAFT_84494
168	8.59e-243	2.72345	0.652	0.282	1.16e-238	Basal membrane cell 2	Bpl_scaf_158-0.9	C-type lectin 9
169	1.68e-240	1.30413	0.453	0.123	2.28e-236	Basal membrane cell 2	Bpl_scaf_19909-1.11	hypothetical protein CGI_10019002
170	2.01e-228	1.24111	0.395	0.097	2.72e-224	Basal membrane cell 2	Bpl_scaf_36449-5.3	---NA---
171	4.6e-227	1.16162	0.315	0.062	6.23e-223	Basal membrane cell 2	Bpl_scaf_27182-0.8	villin-1-like isoform X3
172	6.67e-200	0.951666	0.392	0.104	9.05e-196	Basal membrane cell 2	Bpl_scaf_44428-7.8	calumenin-like isoform X1
173	2.02e-186	1.79145	0.534	0.194	2.74e-182	Basal membrane cell 2	Bpl_scaf_36159-5.5	b(0,+)-type amino acid transporter 1-like
174	1.74e-126	1.24721	0.692	0.427	2.36e-122	Basal membrane cell 2	Bpl_scaf_64387-2.10	ribosome-binding 1-like isoform X5
175	1.08e-112	0.821142	0.35	0.124	1.46e-108	Basal membrane cell 2	Bpl_scaf_6185-3.6	FAD-dependent oxidoreductase domain-containing 2-like
176	6.73e-103	1.24067	0.376	0.145	9.13e-99	Basal membrane cell 2	Bpl_scaf_30977-2.7	PREDICTED: uncharacterized protein LOC105317678 isoform X4
177	1.85e-89	1.02413	0.271	0.092	2.51e-85	Basal membrane cell 2	Bpl_scaf_44362-6.48	carcinolectin 5a isoform
178	4.85e-80	2.59687	0.46	0.256	6.57e-76	Basal membrane cell 2	Bpl_scaf_20338-0.1	, partial
179	1.33e-69	0.6802	0.255	0.093	1.8e-65	Basal membrane cell 2	Bpl_scaf_31501-22.13	Synaptotagmin 5
180	1.94e-66	1.01414	0.592	0.381	2.63e-62	Basal membrane cell 2	Bpl_scaf_58266-2.19	A-kinase anchor 9-like
181	7.77e-62	0.746813	0.325	0.149	1.05e-57	Basal membrane cell 2	Bpl_scaf_7293-3.7	FAM107B-like, partial
182	2.86e-50	0.828664	0.496	0.323	3.88e-46	Basal membrane cell 2	Bpl_scaf_31501-17.32	cyclic AMP-responsive element-binding 3 2 isoform X1
183	1.48e-47	0.73	0.49	0.313	2e-43	Basal membrane cell 2	Bpl_scaf_52001-4.4	luc7 3
184	2.77e-47	0.666026	0.263	0.12	3.75e-43	Basal membrane cell 2	Bpl_scaf_1365-0.2	prostate-associated microsemino -like
185	6.92e-47	0.711352	0.379	0.215	9.38e-43	Basal membrane cell 2	Bpl_scaf_20675-2.12	vigilin-like isoform X1
186	2.25e-39	0.732465	0.568	0.419	3.04e-35	Basal membrane cell 2	Bpl_scaf_61540-3.13	formin-binding 4 isoform X1
187	4.97e-36	0.664756	0.441	0.294	6.73e-32	Basal membrane cell 2	Bpl_scaf_8797-1.23	arginine and glutamate-rich 1-like
188	6.47e-34	0.517312	0.288	0.157	8.77e-30	Basal membrane cell 2	Bpl_scaf_53547-1.4	FK506-binding 4-like
189	1.33e-32	0.523145	0.276	0.148	1.8e-28	Basal membrane cell 2	Bpl_scaf_59079-5.29	kinesin KIF16B isoform X4
190	8.24e-32	0.521659	0.283	0.155	1.12e-27	Basal membrane cell 2	Bpl_scaf_53138-2.14	viral A-type inclusion
191	2.49e-30	0.607731	0.305	0.181	3.38e-26	Basal membrane cell 2	Bpl_scaf_62441-11.7	1-phosphatidylinositol 4,5-bisphosphate phosphodiesterase gamma-1-like isoform X2
192	1.09e-24	0.561598	0.605	0.501	1.48e-20	Basal membrane cell 2	Bpl_scaf_36436-0.10	cell division cycle and apoptosis regulator 1 isoform X1
193	6.37e-23	0.539871	0.379	0.263	8.63e-19	Basal membrane cell 2	Bpl_scaf_50950-2.5	leukocyte receptor cluster member 8 homolog
194	9.02e-22	0.547302	0.307	0.203	1.22e-17	Basal membrane cell 2	Bpl_scaf_8188-0.18	disulfide isomerase
195	6.74e-16	0.481649	0.348	0.258	9.13e-12	Basal membrane cell 2	Bpl_scaf_17533-3.21	ankyrin-2-like isoform X5
196	8e-16	0.436545	0.559	0.474	1.08e-11	Basal membrane cell 2	Bpl_scaf_24012-4.8	serine arginine repetitive matrix 1-like isoform X1
197	7.3e-15	0.524212	0.351	0.269	9.9e-11	Basal membrane cell 2	Bpl_scaf_46356-0.8	golgin subfamily A member 4-like
198	1.64e-13	0.445028	0.454	0.372	2.23e-09	Basal membrane cell 2	Bpl_scaf_22242-2.44	tubulin alpha-1A chain-like, partial
199	1.76e-12	0.457175	0.294	0.217	2.39e-08	Basal membrane cell 2	Bpl_scaf_64161-1.18	viral A-type inclusion
200	6.69e-12	0.59308	0.688	0.674	9.06e-08	Basal membrane cell 2	Bpl_scaf_47525-1.6	---NA---
201	3.54e-11	0.441994	0.411	0.341	4.8e-07	Basal membrane cell 2	Bpl_scaf_59079-12.14	spectrin beta chain-like isoform X1
202	3.37e-07	0.409718	0.407	0.362	0.00457208	Basal membrane cell 2	Bpl_scaf_60067-7.14	pre-mRNA-splicing factor CWC22 homolog
203	2.02e-06	0.547313	0.357	0.303	0.0273954	Basal membrane cell 2	Bpl_scaf_45750-0.6	gamma-tubulin complex component 3 homolog
204	0	4.67859	0.555	0.109	0	Mucus cell	Bpl_scaf_34471-1.10	asialoglyco receptor 1 isoform X1
205	0	4.61455	0.853	0.155	0	Mucus cell	Bpl_scaf_23804-0.9	wsc domain-containing
206	0	4.31181	0.77	0.09	0	Mucus cell	Bpl_scaf_20639-0.0	---NA---
207	0	3.98999	0.72	0.252	0	Mucus cell	Bpl_scaf_16935-0.17	A disintegrin and metallo ase with thrombospondin motifs gon-1-like
208	0	3.95408	0.621	0.09	0	Mucus cell	Bpl_scaf_58694-0.22	C-type lectin
209	0	3.77732	0.586	0.06	0	Mucus cell	Bpl_scaf_57916-0.0	---NA---
210	0	3.43236	0.77	0.105	0	Mucus cell	Bpl_scaf_55758-0.1	---NA---
211	0	3.36832	0.601	0.074	0	Mucus cell	Bpl_scaf_63360-12.8	---NA---
212	0	3.06987	0.736	0.113	0	Mucus cell	Bpl_scaf_55216-2.11	C1q domain containing 1q11
213	0	2.67411	0.613	0.056	0	Mucus cell	Bpl_scaf_3643-4.12	---NA---
214	0	2.54679	0.499	0.07	0	Mucus cell	Bpl_scaf_49279-6.18	shell fibrous prismatic perlucin 1
215	0	2.43904	0.497	0.028	0	Mucus cell	Bpl_scaf_3643-3.6	---NA---
216	0	2.14992	0.629	0.073	0	Mucus cell	Bpl_scaf_23570-1.11	wsc domain-containing
217	0	2.02842	0.583	0.043	0	Mucus cell	Bpl_scaf_63360-14.9	---NA---
218	0	1.97378	0.49	0.045	0	Mucus cell	Bpl_scaf_18519-2.15	Fibrinogen C domain-containing 1
219	0	1.89265	0.354	0.016	0	Mucus cell	Bpl_scaf_38133-0.8	C-type lectin 6
220	0	1.6066	0.563	0.111	0	Mucus cell	Bpl_scaf_1365-0.2	prostate-associated microsemino -like
221	0	1.58897	0.532	0.043	0	Mucus cell	Bpl_scaf_53693-1.19	fungistatic metabolite
222	0	1.46506	0.273	0.033	0	Mucus cell	Bpl_scaf_55716-0.9	, partial
223	0	1.4358	0.367	0.07	0	Mucus cell	Bpl_scaf_24329-1.12	C-type lectin domain family 17, member A isoform X2
224	0	1.411	0.492	0.027	0	Mucus cell	Bpl_scaf_61638-0.5	---NA---
225	0	1.28128	0.361	0.026	0	Mucus cell	Bpl_scaf_56223-0.0	H5p, partial
226	0	1.21068	0.368	0.065	0	Mucus cell	Bpl_scaf_49279-6.17	aggrecan core
227	0	1.17352	0.509	0.146	0	Mucus cell	Bpl_scaf_51674-0.5	complement C1q 4
228	0	1.16307	0.388	0.013	0	Mucus cell	Bpl_scaf_21273-4.5	Short transient receptor potential channel 3, partial
229	0	1.11573	0.44	0.017	0	Mucus cell	Bpl_scaf_12478-0.11	Penicillin-binding 4
230	0	1.07107	0.266	0.014	0	Mucus cell	Bpl_scaf_23446-0.7	neurocan core
231	0	1.06435	0.421	0.063	0	Mucus cell	Bpl_scaf_51513-0.10	skeletal aspartic acid-rich 2-like
232	0	1.06048	0.298	0.016	0	Mucus cell	Bpl_scaf_41651-0.2	H5p, partial
233	0	1.03416	0.299	0.032	0	Mucus cell	Bpl_scaf_30599-0.2	---NA---
234	0	0.943478	0.338	0.012	0	Mucus cell	Bpl_scaf_61552-4.15	inositol 1,4,5-trisphosphate receptor type 2-like isoform X1
235	0	0.923326	0.255	0.008	0	Mucus cell	Bpl_scaf_13267-0.0	---NA---
236	0	0.886224	0.269	0.007	0	Mucus cell	Bpl_scaf_38038-0.0	---NA---
237	0	0.84561	0.31	0.059	0	Mucus cell	Bpl_scaf_27182-0.8	villin-1-like isoform X3
238	0	0.832707	0.281	0.014	0	Mucus cell	Bpl_scaf_17051-23.14	gelsolin 2
239	0	0.82874	0.293	0.024	0	Mucus cell	Bpl_scaf_56025-0.28	fibrinogen C domain-containing 1-like isoform X3
240	0	0.717462	0.266	0.016	0	Mucus cell	Bpl_scaf_23570-1.5	WSC domain-containing 2
241	0	0.641931	0.29	0.054	0	Mucus cell	Bpl_scaf_53685-0.12	Seleno N
242	0	0.572014	0.26	0.011	0	Mucus cell	Bpl_scaf_29705-0.1	---NA---
243	6.17e-249	0.63625	0.283	0.065	8.36e-245	Mucus cell	Bpl_scaf_43573-4.9	calumenin-like isoform X2
244	4.03e-211	0.865808	0.496	0.197	5.46e-207	Mucus cell	Bpl_scaf_8188-0.18	disulfide isomerase
245	4.57e-201	0.658603	0.263	0.066	6.19e-197	Mucus cell	Bpl_scaf_33028-0.7	PREDICTED: uncharacterized protein LOC105318574
246	1.68e-143	0.769523	0.926	0.799	2.28e-139	Mucus cell	Bpl_scaf_43962-2.9	elongation factor 1 alpha
247	5.54e-99	0.613586	0.874	0.71	7.51e-95	Mucus cell	Bpl_scaf_58007-2.15	40S ribosomal S20
248	4.3e-92	0.600858	0.797	0.602	5.83e-88	Mucus cell	Bpl_scaf_32527-1.23	translationally-controlled tumor
249	4.14e-89	0.660493	0.534	0.32	5.61e-85	Mucus cell	Bpl_scaf_31501-17.32	cyclic AMP-responsive element-binding 3 2 isoform X1
250	1.78e-87	0.420194	0.33	0.15	2.41e-83	Mucus cell	Bpl_scaf_28599-0.15	CD63 antigen-like
251	9.21e-81	0.577265	0.606	0.395	1.25e-76	Mucus cell	Bpl_scaf_45479-0.6	60S ribosomal L37a
252	3.4e-80	0.527195	0.592	0.367	4.61e-76	Mucus cell	Bpl_scaf_22242-2.44	tubulin alpha-1A chain-like, partial
253	6.18e-79	0.543865	0.558	0.351	8.37e-75	Mucus cell	Bpl_scaf_9649-0.3	elongation factor 1-beta
254	6.1e-73	0.877837	0.567	0.38	8.27e-69	Mucus cell	Bpl_scaf_58266-2.19	A-kinase anchor 9-like
255	1.18e-71	0.488506	0.914	0.82	1.6e-67	Mucus cell	Bpl_scaf_28870-1.8	translation elongation factor 2
256	1.46e-71	0.560547	0.46	0.27	1.98e-67	Mucus cell	Bpl_scaf_13258-1.4	nucleolysin TIA-1 isoform p40-like isoform X7
257	9.17e-68	0.662374	0.604	0.408	1.24e-63	Mucus cell	Bpl_scaf_22849-1.5	---NA---
258	1.72e-67	0.443663	0.612	0.401	2.33e-63	Mucus cell	Bpl_scaf_63703-4.35	MT22_MYTED ame: Full=Metallothionein 20-II Short=MT-20-II
259	3.39e-67	0.497283	0.424	0.239	4.59e-63	Mucus cell	Bpl_scaf_2518-0.1	---NA---
260	1.2e-62	0.42177	0.406	0.23	1.62e-58	Mucus cell	Bpl_scaf_21889-0.17	ribosomal rpl26
261	2.02e-61	0.496696	0.278	0.136	2.74e-57	Mucus cell	Bpl_scaf_49856-0.2	RNA binding fox-1 homolog 2-like isoform X2
262	2.73e-58	0.491426	0.605	0.428	3.7e-54	Mucus cell	Bpl_scaf_64482-0.4	ribosomal L24
263	2.84e-55	0.465684	0.832	0.7	3.84e-51	Mucus cell	Bpl_scaf_59681-3.28	60S ribosomal L19
264	5.88e-55	0.410918	0.83	0.668	7.97e-51	Mucus cell	Bpl_scaf_4916-0.9	ribosomal L44
265	2.51e-50	0.452965	0.61	0.43	3.41e-46	Mucus cell	Bpl_scaf_25972-1.4	hypothetical protein CGI_10021602
266	5.74e-47	0.419942	0.635	0.468	7.77e-43	Mucus cell	Bpl_scaf_21209-0.8	actin, cytoplasmic
267	7.49e-46	0.440438	0.699	0.541	1.01e-41	Mucus cell	Bpl_scaf_47521-0.15	60S acidic ribosomal P2
268	2.17e-45	0.463359	0.414	0.256	2.94e-41	Mucus cell	Bpl_scaf_20338-0.1	, partial
269	2.76e-44	0.406008	0.592	0.424	3.74e-40	Mucus cell	Bpl_scaf_8121-1.3	60S ribosomal L10-like
270	3.85e-43	0.656142	0.403	0.261	5.22e-39	Mucus cell	Bpl_scaf_57007-3.16	myoferlin-like isoform X5
271	7.66e-42	0.423395	0.585	0.423	1.04e-37	Mucus cell	Bpl_scaf_8329-6.29	MAP kinase-interacting serine threonine- kinase 1-like isoform X1

## Sheet: Supplementary File 1c
Supplementary File 1c. Identified cell markers of the ciliary cells, including the Apical ridge ciliary cell, the Food grove ciliary cell, the Lateral ciliary cell, the smooth muscle cell, and the Intercalary cell.
	p_val	avg_log2FC	pct.1	pct.2	p_val_adj	cluster	gene	Description
1	0	1.4746	0.659	0.154	0	Apical ridge ciliary cell	Bpl_scaf_1314-1.13	Laminin subunit alpha-3
2	0	1.38476	0.74	0.344	0	Apical ridge ciliary cell	Bpl_scaf_17778-1.17	dynein heavy chain 10, axonemal-like isoform X1
3	0	1.18256	0.761	0.267	0	Apical ridge ciliary cell	Bpl_scaf_55568-3.5	trichohyalin-like isoform X11
4	0	1.16768	0.525	0.089	0	Apical ridge ciliary cell	Bpl_scaf_3782-4.23	golgin subfamily A member 6 22
5	0	1.14829	0.717	0.224	0	Apical ridge ciliary cell	Bpl_scaf_64005-8.8	thioredoxin domain-containing 3 homolog isoform X17
6	0	1.14755	0.788	0.426	0	Apical ridge ciliary cell	Bpl_scaf_58954-2.7	Transient receptor potential cation channel subfamily M member 3
7	0	1.08254	0.839	0.474	0	Apical ridge ciliary cell	Bpl_scaf_53908-4.17	tubulin alpha-1A chain
8	0	0.960503	0.657	0.228	0	Apical ridge ciliary cell	Bpl_scaf_1087-4.15	adenylate kinase 9
9	0	0.897112	0.493	0.116	0	Apical ridge ciliary cell	Bpl_scaf_3489-0.37	tubulin alpha-1A chain
10	0	0.859623	0.585	0.214	0	Apical ridge ciliary cell	Bpl_scaf_29041-0.21	---NA---
11	0	0.848854	0.745	0.363	0	Apical ridge ciliary cell	Bpl_scaf_56338-1.13	centriolin-like isoform X1
12	0	0.814057	0.67	0.257	0	Apical ridge ciliary cell	Bpl_scaf_46488-4.14	cilia- and flagella-associated 44-like
13	0	0.792812	0.566	0.187	0	Apical ridge ciliary cell	Bpl_scaf_15185-1.7	myb P isoform X17
14	0	0.783985	0.658	0.275	0	Apical ridge ciliary cell	Bpl_scaf_48229-2.24	hydrocephalus-inducing homolog isoform X2
15	0	0.757683	0.713	0.338	0	Apical ridge ciliary cell	Bpl_scaf_60067-11.23	Cytadherence high molecular weight 2
16	0	0.745397	0.726	0.368	0	Apical ridge ciliary cell	Bpl_scaf_63665-1.12	Cytadherence high molecular weight 2
17	0	0.743965	0.446	0.107	0	Apical ridge ciliary cell	Bpl_scaf_4947-10.10	PREDICTED: uncharacterized protein LOC105319401 isoform X7
18	0	0.724691	0.639	0.274	0	Apical ridge ciliary cell	Bpl_scaf_36964-11.16	dynein heavy chain 3, axonemal-like
19	0	0.721201	0.412	0.102	0	Apical ridge ciliary cell	Bpl_scaf_1581-3.13	muscle M-line assembly unc-89-like isoform X3
20	0	0.71964	0.556	0.177	0	Apical ridge ciliary cell	Bpl_scaf_7664-3.13	dynein heavy chain 5, axonemal-like
21	0	0.713311	0.454	0.116	0	Apical ridge ciliary cell	Bpl_scaf_50318-2.17	dynein beta chain, ciliary-like
22	0	0.688626	0.55	0.19	0	Apical ridge ciliary cell	Bpl_scaf_4947-11.17	IQ and AAA domain-containing 1-like isoform X2
23	0	0.687688	0.893	0.617	0	Apical ridge ciliary cell	Bpl_scaf_2723-4.12	nesprin-1-like isoform X3
24	0	0.646636	0.369	0.09	0	Apical ridge ciliary cell	Bpl_scaf_1581-3.14	titin-like isoform X9
25	0	0.643152	0.457	0.144	0	Apical ridge ciliary cell	Bpl_scaf_48590-5.17	dynein beta chain, ciliary-like
26	0	0.639267	0.55	0.214	0	Apical ridge ciliary cell	Bpl_scaf_26364-0.10	kinesin KIF28P
27	0	0.637924	0.486	0.204	0	Apical ridge ciliary cell	Bpl_scaf_26757-3.10	centrosome-associated 350
28	0	0.637857	0.484	0.164	0	Apical ridge ciliary cell	Bpl_scaf_7079-3.11	sperm flagellar 2-like isoform X2
29	0	0.637474	0.406	0.101	0	Apical ridge ciliary cell	Bpl_scaf_28660-7.37	sperm-associated antigen 17-like isoform X6
30	0	0.636331	0.702	0.358	0	Apical ridge ciliary cell	Bpl_scaf_50887-8.25	centrosome and spindle pole-associated 1-like
31	0	0.635375	0.307	0.014	0	Apical ridge ciliary cell	Bpl_scaf_31793-6.10	---NA---
32	0	0.624121	0.588	0.269	0	Apical ridge ciliary cell	Bpl_scaf_10266-0.7	trichohyalin isoform X5
33	0	0.611271	0.294	0.025	0	Apical ridge ciliary cell	Bpl_scaf_20631-1.16	homeobox Dlx6a-like
34	0	0.605411	0.643	0.296	0	Apical ridge ciliary cell	Bpl_scaf_25745-2.12	trichohyalin isoform X1
35	0	0.603854	0.367	0.092	0	Apical ridge ciliary cell	Bpl_scaf_58266-20.17	regulator of G- signaling 22-like isoform X12
36	0	0.60378	0.489	0.167	0	Apical ridge ciliary cell	Bpl_scaf_61985-2.10	IQ and ubiquitin-like domain-containing isoform X1
37	0	0.592762	0.32	0.057	0	Apical ridge ciliary cell	Bpl_scaf_1371-4.1	RNA-binding 25-like
38	0	0.581289	0.387	0.097	0	Apical ridge ciliary cell	Bpl_scaf_47430-7.16	abnormal spindle-like microcephaly-associated homolog isoform X3
39	0	0.574368	0.443	0.144	0	Apical ridge ciliary cell	Bpl_scaf_40907-2.12	coiled-coil domain-containing 151-like
40	0	0.570437	0.362	0.093	0	Apical ridge ciliary cell	Bpl_scaf_3489-0.36	tubulin alpha-1A chain
41	0	0.564992	0.415	0.158	0	Apical ridge ciliary cell	Bpl_scaf_5285-5.10	dynein light chain 2, cytoplasmic
42	0	0.564813	0.818	0.421	0	Apical ridge ciliary cell	Bpl_scaf_22362-6.9	rootletin-like isoform X7
43	0	0.563619	0.32	0.07	0	Apical ridge ciliary cell	Bpl_scaf_1581-3.10	titin-like isoform X9
44	0	0.552141	0.415	0.113	0	Apical ridge ciliary cell	Bpl_scaf_53430-2.9	roundabout homolog 1-like
45	0	0.539384	0.29	0.03	0	Apical ridge ciliary cell	Bpl_scaf_34515-1.7	BMP and activin membrane-bound inhibitor homolog
46	0	0.533805	0.277	0.045	0	Apical ridge ciliary cell	Bpl_scaf_50824-1.21	cAMP-dependent kinase regulatory subunit
47	0	0.529844	0.436	0.153	0	Apical ridge ciliary cell	Bpl_scaf_61985-3.13	dynein heavy chain 12, axonemal isoform X2
48	0	0.524396	0.386	0.118	0	Apical ridge ciliary cell	Bpl_scaf_3520-8.8	forkhead-associated domain-containing 1-like
49	0	0.524043	0.414	0.137	0	Apical ridge ciliary cell	Bpl_scaf_31557-6.11	dynein heavy chain 2, axonemal isoform X1
50	0	0.521735	0.392	0.117	0	Apical ridge ciliary cell	Bpl_scaf_33098-2.18	cilia- and flagella-associated 57-like
51	0	0.520407	0.251	0.073	0	Apical ridge ciliary cell	Bpl_scaf_60605-0.12	adenylate kinase isoenzyme 5-like isoform X1
52	0	0.515111	0.4	0.138	0	Apical ridge ciliary cell	Bpl_scaf_4027-0.9	cilia- and flagella-associated 45-like
53	0	0.505502	0.28	0.05	0	Apical ridge ciliary cell	Bpl_scaf_7408-7.10	cAMP-dependent kinase regulatory subunit
54	0	0.501356	0.264	0.031	0	Apical ridge ciliary cell	Bpl_scaf_12374-5.16	annulin-like isoform X2
55	0	0.488535	0.313	0.076	0	Apical ridge ciliary cell	Bpl_scaf_8775-17.9	thioredoxin II
56	0	0.487307	0.366	0.135	0	Apical ridge ciliary cell	Bpl_scaf_5539-1.27	tubulin polymerization-promoting family member 3-like
57	0	0.486137	0.356	0.11	0	Apical ridge ciliary cell	Bpl_scaf_48232-3.25	dynein gamma chain, flagellar outer arm-like
58	0	0.4854	0.417	0.153	0	Apical ridge ciliary cell	Bpl_scaf_31275-3.9	dynein heavy chain 7, axonemal-like
59	0	0.484428	0.338	0.095	0	Apical ridge ciliary cell	Bpl_scaf_57484-10.4	MAATS1-like isoform X1
60	0	0.482736	0.328	0.088	0	Apical ridge ciliary cell	Bpl_scaf_54796-6.4	annexin A6-like isoform X1
61	0	0.478203	0.331	0.1	0	Apical ridge ciliary cell	Bpl_scaf_47185-0.12	---NA---
62	0	0.472368	0.335	0.095	0	Apical ridge ciliary cell	Bpl_scaf_38784-6.9	IQ domain-containing G-like
63	0	0.461189	0.325	0.089	0	Apical ridge ciliary cell	Bpl_scaf_10095-1.8	PREDICTED: uncharacterized protein LOC105326112 isoform X1
64	0	0.451762	0.26	0.045	0	Apical ridge ciliary cell	Bpl_scaf_63462-0.66	caveolin-1-like
65	0	0.447127	0.272	0.052	0	Apical ridge ciliary cell	Bpl_scaf_49759-11.15	PREDICTED: uncharacterized protein LOC105324877 isoform X2
66	0	0.443833	0.325	0.098	0	Apical ridge ciliary cell	Bpl_scaf_49352-6.23	cilia- and flagella-associated 58
67	0	0.435189	0.526	0.23	0	Apical ridge ciliary cell	Bpl_scaf_268-1.11	dynein heavy chain 5, axonemal
68	0	0.432188	0.373	0.123	0	Apical ridge ciliary cell	Bpl_scaf_54983-2.5	Armadillo repeat-containing 4
69	0	0.428912	0.343	0.119	0	Apical ridge ciliary cell	Bpl_scaf_6018-1.10	coiled-coil domain-containing 181-like isoform X1
70	0	0.428328	0.326	0.094	0	Apical ridge ciliary cell	Bpl_scaf_62500-3.23	radial spoke head 1 homolog
71	0	0.424485	0.277	0.066	0	Apical ridge ciliary cell	Bpl_scaf_58194-1.13	Intermediate filament tail domain-containing 1
72	0	0.420538	0.341	0.112	0	Apical ridge ciliary cell	Bpl_scaf_22762-1.5	WD repeat-containing 63-like
73	0	0.411597	0.324	0.105	0	Apical ridge ciliary cell	Bpl_scaf_59648-6.11	cilia- and flagella-associated 54-like
74	3.34e-295	0.531897	0.667	0.352	4.52e-291	Apical ridge ciliary cell	Bpl_scaf_28870-6.10	myosin-2 heavy chain-like
75	6.68e-278	0.742487	0.385	0.157	9.05e-274	Apical ridge ciliary cell	Bpl_scaf_44514-0.0	kelch 29 isoform X1
76	3.2e-277	0.457478	0.438	0.19	4.34e-273	Apical ridge ciliary cell	Bpl_scaf_19895-1.55	tubulin beta-2B chain-like
77	2.69e-267	0.412384	0.543	0.267	3.65e-263	Apical ridge ciliary cell	Bpl_scaf_56339-14.6	PREDICTED: uncharacterized protein LOC105326108 isoform X5
78	3.85e-267	0.438216	0.374	0.153	5.22e-263	Apical ridge ciliary cell	Bpl_scaf_48036-0.8	G1 S-specific cyclin-D2
79	2.52e-263	0.456476	0.74	0.427	3.41e-259	Apical ridge ciliary cell	Bpl_scaf_35727-1.14	myosin-10-like isoform X17
80	8.54e-257	0.618125	0.502	0.242	1.16e-252	Apical ridge ciliary cell	Bpl_scaf_10008-0.27	---NA---
81	1.08e-245	0.614995	0.697	0.429	1.46e-241	Apical ridge ciliary cell	Bpl_scaf_63703-4.30	cytochrome c
82	4.19e-241	0.522876	0.401	0.175	5.68e-237	Apical ridge ciliary cell	Bpl_scaf_33810-1.25	---NA---
83	4.13e-239	0.469999	0.512	0.259	5.6e-235	Apical ridge ciliary cell	Bpl_scaf_13258-1.4	nucleolysin TIA-1 isoform p40-like isoform X7
84	1.45e-238	0.534136	0.354	0.146	1.96e-234	Apical ridge ciliary cell	Bpl_scaf_59225-0.1	---NA---
85	5.63e-236	0.484761	0.366	0.153	7.62e-232	Apical ridge ciliary cell	Bpl_scaf_15188-0.0	---NA---
86	1.22e-231	0.673455	0.87	0.63	1.65e-227	Apical ridge ciliary cell	Bpl_scaf_13236-2.10	Soma ferritin
87	1.41e-231	0.600825	0.448	0.212	1.91e-227	Apical ridge ciliary cell	Bpl_scaf_41063-6.8	lipoxygenase homology domain-containing 1-like isoform X1
88	2.14e-225	0.453999	0.45	0.215	2.9e-221	Apical ridge ciliary cell	Bpl_scaf_21031-4.17	b(0,+)-type amino acid transporter 1-like isoform X3
89	9.14e-221	1.14401	0.738	0.503	1.24e-216	Apical ridge ciliary cell	Bpl_scaf_63069-1.25	---NA---
90	1.11e-208	0.412724	0.719	0.438	1.51e-204	Apical ridge ciliary cell	Bpl_scaf_33596-10.18	golgin subfamily B member 1-like isoform X3
91	5.14e-200	0.443687	0.32	0.137	6.97e-196	Apical ridge ciliary cell	Bpl_scaf_1856-1.9	Chitin synthase C
92	1.34e-191	0.508919	0.339	0.15	1.82e-187	Apical ridge ciliary cell	Bpl_scaf_59225-0.0	kelch 29 isoform X1
93	2.5e-182	0.578884	0.343	0.159	3.39e-178	Apical ridge ciliary cell	Bpl_scaf_63069-1.6	---NA---
94	1.92e-171	0.742542	0.352	0.171	2.6e-167	Apical ridge ciliary cell	Bpl_scaf_25425-0.8	---NA---
95	4.93e-170	0.581996	0.285	0.124	6.69e-166	Apical ridge ciliary cell	Bpl_scaf_14775-0.3	PREDICTED: uncharacterized protein LOC105324435 isoform X10
96	2.63e-145	0.862442	0.649	0.438	3.56e-141	Apical ridge ciliary cell	Bpl_scaf_48274-0.3	carbonic anhydrase 1-like
97	7.04e-145	0.52698	0.317	0.154	9.55e-141	Apical ridge ciliary cell	Bpl_scaf_63069-0.3	---NA---
98	6.46e-57	0.65851	0.523	0.406	8.76e-53	Apical ridge ciliary cell	Bpl_scaf_55952-0.12	---NA---
99	0	2.65257	0.857	0.018	0	Food grove ciliary cell	Bpl_scaf_57332-1.1	---NA---
100	0	1.44105	0.686	0.112	0	Food grove ciliary cell	Bpl_scaf_3782-4.23	golgin subfamily A member 6 22
101	0	1.2647	0.471	0.031	0	Food grove ciliary cell	Bpl_scaf_56881-0.12	---NA---
102	0	1.15011	0.548	0.07	0	Food grove ciliary cell	Bpl_scaf_1371-4.1	RNA-binding 25-like
103	0	1.13393	0.557	0.011	0	Food grove ciliary cell	Bpl_scaf_5544-0.0	---NA---
104	0	0.892396	0.469	0.014	0	Food grove ciliary cell	Bpl_scaf_52780-3.13	hemicentin-1-like isoform X1
105	0	0.842521	0.513	0.004	0	Food grove ciliary cell	Bpl_scaf_64954-7.11	PREDICTED: uncharacterized protein LOC105325275
106	0	0.603402	0.261	0.012	0	Food grove ciliary cell	Bpl_scaf_58225-0.3	---NA---
107	0	0.585438	0.329	0.013	0	Food grove ciliary cell	Bpl_scaf_43277-1.6	kyphoscoliosis peptidase-like
108	0	0.571008	0.355	0.008	0	Food grove ciliary cell	Bpl_scaf_25767-5.5	paramyosin-like isoform X1
109	2.17e-267	0.630615	0.309	0.028	2.94e-263	Food grove ciliary cell	Bpl_scaf_32409-2.44	calpain-2 catalytic subunit-like
110	3.47e-214	1.06064	0.557	0.107	4.7e-210	Food grove ciliary cell	Bpl_scaf_27182-3.10	tektin-3-like
111	3.62e-210	0.674275	0.333	0.04	4.9e-206	Food grove ciliary cell	Bpl_scaf_35206-7.10	T9SS C-terminal target domain-containing
112	7.83e-209	1.49429	0.759	0.206	1.06e-204	Food grove ciliary cell	Bpl_scaf_15185-1.7	myb P isoform X17
113	6.09e-191	0.423992	0.25	0.025	8.25e-187	Food grove ciliary cell	Bpl_scaf_25972-2.10	PREDICTED: uncharacterized protein LOC105323477
114	3.78e-189	1.91479	0.947	0.442	5.13e-185	Food grove ciliary cell	Bpl_scaf_22362-6.9	rootletin-like isoform X7
115	1.22e-187	0.989716	0.577	0.124	1.66e-183	Food grove ciliary cell	Bpl_scaf_3150-2.31	tektin-3-like isoform X1
116	6.15e-179	1.23955	0.772	0.231	8.34e-175	Food grove ciliary cell	Bpl_scaf_26364-0.10	kinesin KIF28P
117	9.05e-177	0.792784	0.41	0.07	1.23e-172	Food grove ciliary cell	Bpl_scaf_30291-12.8	hypothetical protein CGI_10018121
118	1.02e-159	0.588687	0.353	0.057	1.38e-155	Food grove ciliary cell	Bpl_scaf_18893-4.6	Tubulin beta-2C chain
119	2.89e-147	1.45349	0.879	0.38	3.92e-143	Food grove ciliary cell	Bpl_scaf_56354-7.8	Reticulocyte-binding 2 a
120	7.32e-145	0.7078	0.417	0.082	9.92e-141	Food grove ciliary cell	Bpl_scaf_16961-13.19	small lysine-rich 1
121	2.31e-143	0.709822	0.408	0.079	3.13e-139	Food grove ciliary cell	Bpl_scaf_28270-1.15	ninein-like isoform X1
122	3.6e-137	0.958449	0.822	0.294	4.88e-133	Food grove ciliary cell	Bpl_scaf_55568-3.5	trichohyalin-like isoform X11
123	4.38e-133	0.459929	0.287	0.044	5.94e-129	Food grove ciliary cell	Bpl_scaf_25767-1.18	Kyphoscoliosis peptidase
124	7.03e-133	0.735452	0.428	0.092	9.53e-129	Food grove ciliary cell	Bpl_scaf_28083-4.9	cyclin-dependent kinase-like 2 isoform X2
125	2.68e-123	0.448369	0.252	0.037	3.63e-119	Food grove ciliary cell	Bpl_scaf_56732-0.16	calpain-5-like isoform X2
126	3.18e-123	0.873542	0.456	0.112	4.31e-119	Food grove ciliary cell	Bpl_scaf_47185-0.12	---NA---
127	5.13e-123	0.809622	0.458	0.11	6.95e-119	Food grove ciliary cell	Bpl_scaf_681-0.13	DNA-directed RNA polymerases I, II, and III subunit RPABC3
128	1.35e-115	0.617432	0.401	0.09	1.83e-111	Food grove ciliary cell	Bpl_scaf_6739-1.4	RNA-binding 24-A-like isoform X1
129	1.14e-113	0.851456	0.502	0.138	1.55e-109	Food grove ciliary cell	Bpl_scaf_3489-0.37	tubulin alpha-1A chain
130	8.88e-111	0.758667	0.526	0.147	1.2e-106	Food grove ciliary cell	Bpl_scaf_59079-5.29	kinesin KIF16B isoform X4
131	2.48e-110	0.715089	0.485	0.129	3.36e-106	Food grove ciliary cell	Bpl_scaf_53430-2.9	roundabout homolog 1-like
132	6.18e-107	0.489083	0.3	0.057	8.38e-103	Food grove ciliary cell	Bpl_scaf_50330-4.27	lipopolysaccharide-induced TNF-alpha factor
133	1.96e-105	0.446775	0.272	0.048	2.66e-101	Food grove ciliary cell	Bpl_scaf_7779-2.7	epithelial splicing regulatory 1-like isoform X1
134	9.76e-105	0.931856	0.546	0.167	1.32e-100	Food grove ciliary cell	Bpl_scaf_31275-3.9	dynein heavy chain 7, axonemal-like
135	9.59e-100	0.967191	0.708	0.285	1.3e-95	Food grove ciliary cell	Bpl_scaf_55620-1.3	FAM179B-like isoform X1
136	1.04e-94	0.466581	0.283	0.056	1.41e-90	Food grove ciliary cell	Bpl_scaf_1831-0.12	---NA---
137	1.06e-92	0.780261	0.586	0.198	1.44e-88	Food grove ciliary cell	Bpl_scaf_7664-3.13	dynein heavy chain 5, axonemal-like
138	3.3e-92	1.45405	0.851	0.446	4.48e-88	Food grove ciliary cell	Bpl_scaf_58954-2.7	Transient receptor potential cation channel subfamily M member 3
139	1.81e-90	0.506107	0.32	0.072	2.45e-86	Food grove ciliary cell	Bpl_scaf_2315-1.15	trichohyalin-like isoform X31
140	9.92e-89	0.8196	0.667	0.252	1.35e-84	Food grove ciliary cell	Bpl_scaf_1087-4.15	adenylate kinase 9
141	1.1e-86	0.505749	0.289	0.063	1.49e-82	Food grove ciliary cell	Bpl_scaf_55620-2.12	tetratricopeptide repeat 18-like isoform X12
142	1.11e-82	0.566792	0.395	0.108	1.5e-78	Food grove ciliary cell	Bpl_scaf_3489-0.36	tubulin alpha-1A chain
143	3.88e-79	1.90004	0.86	0.515	5.25e-75	Food grove ciliary cell	Bpl_scaf_63069-1.25	---NA---
144	4.39e-79	0.965461	0.785	0.376	5.96e-75	Food grove ciliary cell	Bpl_scaf_50887-8.25	centrosome and spindle pole-associated 1-like
145	1.87e-77	0.846755	0.667	0.28	2.54e-73	Food grove ciliary cell	Bpl_scaf_46488-4.14	cilia- and flagella-associated 44-like
146	9.39e-77	0.823623	0.66	0.276	1.27e-72	Food grove ciliary cell	Bpl_scaf_14002-3.3	arginine kinase
147	2.24e-72	0.595226	0.373	0.107	3.03e-68	Food grove ciliary cell	Bpl_scaf_58266-20.17	regulator of G- signaling 22-like isoform X12
148	2.65e-72	0.613638	0.355	0.099	3.59e-68	Food grove ciliary cell	Bpl_scaf_52620-0.8	---NA---
149	1.7e-70	0.898296	0.507	0.18	2.3e-66	Food grove ciliary cell	Bpl_scaf_25425-0.8	---NA---
150	2.92e-68	0.673248	0.436	0.147	3.96e-64	Food grove ciliary cell	Bpl_scaf_5539-1.27	tubulin polymerization-promoting family member 3-like
151	4.88e-68	0.506578	0.338	0.095	6.61e-64	Food grove ciliary cell	Bpl_scaf_38338-5.8	Tetratricopeptide repeat 6
152	1.66e-67	0.613791	0.395	0.124	2.26e-63	Food grove ciliary cell	Bpl_scaf_22762-1.5	WD repeat-containing 63-like
153	2.21e-67	0.61456	0.469	0.162	2.99e-63	Food grove ciliary cell	Bpl_scaf_48590-5.17	dynein beta chain, ciliary-like
154	1.03e-66	0.927577	0.452	0.157	1.39e-62	Food grove ciliary cell	Bpl_scaf_59225-0.1	---NA---
155	3.03e-65	1.02891	0.836	0.494	4.11e-61	Food grove ciliary cell	Bpl_scaf_53908-4.17	tubulin alpha-1A chain
156	5.01e-65	0.701259	0.673	0.296	6.79e-61	Food grove ciliary cell	Bpl_scaf_48229-2.24	hydrocephalus-inducing homolog isoform X2
157	1.19e-62	0.45912	0.357	0.109	1.61e-58	Food grove ciliary cell	Bpl_scaf_38784-6.9	IQ domain-containing G-like
158	3.45e-62	1.47916	0.726	0.366	4.67e-58	Food grove ciliary cell	Bpl_scaf_17778-1.17	dynein heavy chain 10, axonemal-like isoform X1
159	1.13e-61	0.955825	0.461	0.17	1.53e-57	Food grove ciliary cell	Bpl_scaf_44514-0.0	kelch 29 isoform X1
160	1.4e-61	0.846786	0.447	0.162	1.89e-57	Food grove ciliary cell	Bpl_scaf_63069-0.3	---NA---
161	7.32e-61	0.439981	0.311	0.089	9.92e-57	Food grove ciliary cell	Bpl_scaf_8775-17.9	thioredoxin II
162	1.07e-60	0.815216	0.73	0.369	1.45e-56	Food grove ciliary cell	Bpl_scaf_28870-6.10	myosin-2 heavy chain-like
163	1.95e-60	0.570599	0.357	0.113	2.64e-56	Food grove ciliary cell	Bpl_scaf_47430-7.16	abnormal spindle-like microcephaly-associated homolog isoform X3
164	9.64e-58	0.439481	0.274	0.074	1.31e-53	Food grove ciliary cell	Bpl_scaf_48197-1.11	EF-hand calcium-binding domain-containing 5
165	4.41e-56	0.560278	0.524	0.211	5.98e-52	Food grove ciliary cell	Bpl_scaf_4947-11.17	IQ and AAA domain-containing 1-like isoform X2
166	8.66e-56	0.451203	0.254	0.068	1.17e-51	Food grove ciliary cell	Bpl_scaf_46480-0.44	DNA-binding inhibitor ID-2-like
167	1.11e-53	0.728042	0.447	0.168	1.5e-49	Food grove ciliary cell	Bpl_scaf_63069-1.6	---NA---
168	1.31e-53	0.564535	0.351	0.116	1.78e-49	Food grove ciliary cell	Bpl_scaf_51902-5.11	magnesium transporter NIPA2-like isoform X3
169	9.78e-53	0.492336	0.377	0.133	1.33e-48	Food grove ciliary cell	Bpl_scaf_33098-2.18	cilia- and flagella-associated 57-like
170	3.91e-52	0.602499	0.357	0.122	5.3e-48	Food grove ciliary cell	Bpl_scaf_2385-0.1	---NA---
171	4.88e-52	0.886249	0.566	0.256	6.61e-48	Food grove ciliary cell	Bpl_scaf_10008-0.27	---NA---
172	8.01e-51	0.513214	0.41	0.152	1.09e-46	Food grove ciliary cell	Bpl_scaf_4027-0.9	cilia- and flagella-associated 45-like
173	2.46e-50	0.487676	0.325	0.107	3.33e-46	Food grove ciliary cell	Bpl_scaf_62500-3.23	radial spoke head 1 homolog
174	5.2e-49	0.466305	0.379	0.136	7.05e-45	Food grove ciliary cell	Bpl_scaf_50318-2.17	dynein beta chain, ciliary-like
175	6.78e-49	0.427493	0.36	0.125	9.19e-45	Food grove ciliary cell	Bpl_scaf_24834-2.3	tubby-related 3-like isoform X4
176	4.47e-47	0.436472	0.342	0.118	6.07e-43	Food grove ciliary cell	Bpl_scaf_28660-7.37	sperm-associated antigen 17-like isoform X6
177	4.67e-47	0.530392	0.414	0.161	6.33e-43	Food grove ciliary cell	Bpl_scaf_40907-2.12	coiled-coil domain-containing 151-like
178	1.96e-44	0.474394	0.452	0.186	2.66e-40	Food grove ciliary cell	Bpl_scaf_61985-2.10	IQ and ubiquitin-like domain-containing isoform X1
179	1.63e-43	0.923917	0.761	0.449	2.2e-39	Food grove ciliary cell	Bpl_scaf_48274-0.3	carbonic anhydrase 1-like
180	2.36e-43	0.410452	0.32	0.113	3.2e-39	Food grove ciliary cell	Bpl_scaf_60144-1.6	leucine-rich repeat-containing 71-like isoform X8
181	5.46e-43	0.63984	0.399	0.161	7.4e-39	Food grove ciliary cell	Bpl_scaf_59225-0.0	kelch 29 isoform X1
182	8.09e-43	0.533084	0.439	0.182	1.1e-38	Food grove ciliary cell	Bpl_scaf_7079-3.11	sperm flagellar 2-like isoform X2
183	1.32e-42	0.412049	0.342	0.124	1.79e-38	Food grove ciliary cell	Bpl_scaf_48232-3.25	dynein gamma chain, flagellar outer arm-like
184	1.18e-41	0.496536	0.316	0.112	1.6e-37	Food grove ciliary cell	Bpl_scaf_2385-0.2	---NA---
185	1.72e-41	0.620078	0.443	0.187	2.33e-37	Food grove ciliary cell	Bpl_scaf_33810-1.25	---NA---
186	4.67e-41	0.986862	0.715	0.433	6.33e-37	Food grove ciliary cell	Bpl_scaf_25972-1.4	hypothetical protein CGI_10021602
187	6.75e-41	0.581133	0.406	0.165	9.15e-37	Food grove ciliary cell	Bpl_scaf_15188-0.0	---NA---
188	4.02e-40	0.442186	0.307	0.11	5.45e-36	Food grove ciliary cell	Bpl_scaf_49352-6.23	cilia- and flagella-associated 58
189	4.97e-40	0.55992	0.759	0.444	6.74e-36	Food grove ciliary cell	Bpl_scaf_63703-4.30	cytochrome c
190	4.67e-39	0.425301	0.364	0.144	6.33e-35	Food grove ciliary cell	Bpl_scaf_18046-1.7	PERQ amino acid-rich with GYF domain-containing 2-like isoform X2
191	9.64e-39	0.635162	0.596	0.316	1.31e-34	Food grove ciliary cell	Bpl_scaf_57259-5.3	cytoplasmic intermediate filament A
192	5.9e-37	0.433891	0.401	0.169	7.99e-33	Food grove ciliary cell	Bpl_scaf_61985-3.13	dynein heavy chain 12, axonemal isoform X2
193	1.79e-34	0.486031	0.594	0.312	2.43e-30	Food grove ciliary cell	Bpl_scaf_53430-3.8	---NA---
194	2.34e-34	0.628888	0.474	0.225	3.17e-30	Food grove ciliary cell	Bpl_scaf_41063-6.8	lipoxygenase homology domain-containing 1-like isoform X1
195	2.91e-31	0.463645	0.55	0.291	3.95e-27	Food grove ciliary cell	Bpl_scaf_44217-4.35	Tubulin alpha-1C chain
196	3.55e-31	0.484706	0.344	0.147	4.81e-27	Food grove ciliary cell	Bpl_scaf_1856-1.9	Chitin synthase C
197	1.75e-29	0.432511	0.572	0.318	2.37e-25	Food grove ciliary cell	Bpl_scaf_725-7.4	semaphorin-1A-like isoform X1
198	1.49e-27	0.473643	0.314	0.133	2.03e-23	Food grove ciliary cell	Bpl_scaf_14775-0.3	PREDICTED: uncharacterized protein LOC105324435 isoform X10
199	0	3.17969	0.835	0.165	0	Lateral ciliary cell	Bpl_scaf_19969-0.58	tubulin alpha-1A chain
200	0	3.01419	0.886	0.246	0	Lateral ciliary cell	Bpl_scaf_56339-14.6	PREDICTED: uncharacterized protein LOC105326108 isoform X5
201	0	2.27708	0.787	0.146	0	Lateral ciliary cell	Bpl_scaf_11526-0.20	tubulin alpha-1A chain
202	0	2.16959	0.816	0.428	0	Lateral ciliary cell	Bpl_scaf_48274-0.3	carbonic anhydrase 1-like
203	0	1.86533	0.669	0.074	0	Lateral ciliary cell	Bpl_scaf_38703-10.8	Tubulin beta chain
204	0	1.85678	0.738	0.25	0	Lateral ciliary cell	Bpl_scaf_14002-3.3	arginine kinase
205	0	1.76853	0.869	0.419	0	Lateral ciliary cell	Bpl_scaf_22362-6.9	rootletin-like isoform X7
206	0	1.63254	0.747	0.345	0	Lateral ciliary cell	Bpl_scaf_17778-1.17	dynein heavy chain 10, axonemal-like isoform X1
207	0	1.53304	0.729	0.167	0	Lateral ciliary cell	Bpl_scaf_7664-3.13	dynein heavy chain 5, axonemal-like
208	0	1.34556	0.719	0.225	0	Lateral ciliary cell	Bpl_scaf_64005-8.8	thioredoxin domain-containing 3 homolog isoform X17
209	0	1.29582	0.763	0.252	0	Lateral ciliary cell	Bpl_scaf_46488-4.14	cilia- and flagella-associated 44-like
210	0	1.28342	0.807	0.485	0	Lateral ciliary cell	Bpl_scaf_34427-7.24	ATP synthase subunit alpha, mitochondrial
211	0	1.25954	0.564	0.153	0	Lateral ciliary cell	Bpl_scaf_15185-0.8	isocitrate dehydrogenase
212	0	1.23699	0.541	0.101	0	Lateral ciliary cell	Bpl_scaf_3150-2.31	tektin-3-like isoform X1
213	0	1.21191	0.792	0.357	0	Lateral ciliary cell	Bpl_scaf_56354-7.8	Reticulocyte-binding 2 a
214	0	1.16488	0.742	0.271	0	Lateral ciliary cell	Bpl_scaf_48229-2.24	hydrocephalus-inducing homolog isoform X2
215	0	1.15391	0.72	0.225	0	Lateral ciliary cell	Bpl_scaf_1087-4.15	adenylate kinase 9
216	0	1.05309	0.502	0.085	0	Lateral ciliary cell	Bpl_scaf_27182-3.10	tektin-3-like
217	0	1.04916	0.582	0.143	0	Lateral ciliary cell	Bpl_scaf_31275-3.9	dynein heavy chain 7, axonemal-like
218	0	1.00172	0.608	0.161	0	Lateral ciliary cell	Bpl_scaf_61985-2.10	IQ and ubiquitin-like domain-containing isoform X1
219	0	0.991421	0.707	0.292	0	Lateral ciliary cell	Bpl_scaf_25745-2.12	trichohyalin isoform X1
220	0	0.98909	0.302	0.071	0	Lateral ciliary cell	Bpl_scaf_60605-0.12	adenylate kinase isoenzyme 5-like isoform X1
221	0	0.972731	0.616	0.187	0	Lateral ciliary cell	Bpl_scaf_4947-11.17	IQ and AAA domain-containing 1-like isoform X2
222	0	0.950203	0.534	0.207	0	Lateral ciliary cell	Bpl_scaf_41063-6.8	lipoxygenase homology domain-containing 1-like isoform X1
223	0	0.933462	0.799	0.424	0	Lateral ciliary cell	Bpl_scaf_35727-1.14	myosin-10-like isoform X17
224	0	0.910219	0.55	0.146	0	Lateral ciliary cell	Bpl_scaf_61985-3.13	dynein heavy chain 12, axonemal isoform X2
225	0	0.902504	0.736	0.27	0	Lateral ciliary cell	Bpl_scaf_55568-3.5	trichohyalin-like isoform X11
226	0	0.895946	0.31	0.019	0	Lateral ciliary cell	Bpl_scaf_64998-0.6	---NA---
227	0	0.894372	0.335	0.071	0	Lateral ciliary cell	Bpl_scaf_36459-0.6	PREDICTED: uncharacterized protein LOC105336868
228	0	0.893131	0.542	0.161	0	Lateral ciliary cell	Bpl_scaf_7079-3.11	sperm flagellar 2-like isoform X2
229	0	0.863874	0.29	0.01	0	Lateral ciliary cell	Bpl_scaf_681-5.9	CD63 antigen-like
230	0	0.839312	0.507	0.115	0	Lateral ciliary cell	Bpl_scaf_54983-2.5	Armadillo repeat-containing 4
231	0	0.835972	0.486	0.1	0	Lateral ciliary cell	Bpl_scaf_11851-3.7	serine threonine- kinase DCLK2-like isoform X1
232	0	0.824899	0.453	0.07	0	Lateral ciliary cell	Bpl_scaf_6739-1.4	RNA-binding 24-A-like isoform X1
233	0	0.821901	0.418	0.06	0	Lateral ciliary cell	Bpl_scaf_28270-1.15	ninein-like isoform X1
234	0	0.796464	0.613	0.211	0	Lateral ciliary cell	Bpl_scaf_26364-0.10	kinesin KIF28P
235	0	0.782548	0.476	0.104	0	Lateral ciliary cell	Bpl_scaf_22762-1.5	WD repeat-containing 63-like
236	0	0.774264	0.511	0.142	0	Lateral ciliary cell	Bpl_scaf_48590-5.17	dynein beta chain, ciliary-like
237	0	0.757793	0.321	0.023	0	Lateral ciliary cell	Bpl_scaf_30639-0.2	multiple epidermal growth factor-like domains 10
238	0	0.744584	0.574	0.205	0	Lateral ciliary cell	Bpl_scaf_48262-0.27	PREDICTED: uncharacterized protein LOC105344081 isoform X11
239	0	0.74365	0.475	0.116	0	Lateral ciliary cell	Bpl_scaf_50318-2.17	dynein beta chain, ciliary-like
240	0	0.740551	0.8	0.477	0	Lateral ciliary cell	Bpl_scaf_53908-4.17	tubulin alpha-1A chain
241	0	0.727288	0.357	0.019	0	Lateral ciliary cell	Bpl_scaf_55568-2.27	golgin subfamily A member 6 22
242	0	0.722302	0.43	0.068	0	Lateral ciliary cell	Bpl_scaf_64005-8.7	thioredoxin domain-containing 3 homolog isoform X5
243	0	0.7213	0.425	0.07	0	Lateral ciliary cell	Bpl_scaf_49537-8.6	axonemal 84 kDa -like
244	0	0.721251	0.63	0.267	0	Lateral ciliary cell	Bpl_scaf_10266-0.7	trichohyalin isoform X5
245	0	0.710683	0.539	0.253	0	Lateral ciliary cell	Bpl_scaf_54862-1.17	ATP synthase lipid-binding , mitochondrial
246	0	0.70456	0.421	0.086	0	Lateral ciliary cell	Bpl_scaf_1866-2.21	coiled-coil domain-containing 173-like
247	0	0.698418	0.315	0.026	0	Lateral ciliary cell	Bpl_scaf_19969-0.60	tubulin alpha-1A chain
248	0	0.697192	0.319	0.043	0	Lateral ciliary cell	Bpl_scaf_27159-0.7	placenta-specific gene 8 -like
249	0	0.693327	0.566	0.188	0	Lateral ciliary cell	Bpl_scaf_15185-1.7	myb P isoform X17
250	0	0.693075	0.494	0.133	0	Lateral ciliary cell	Bpl_scaf_4027-0.9	cilia- and flagella-associated 45-like
251	0	0.691668	0.389	0.065	0	Lateral ciliary cell	Bpl_scaf_16961-13.19	small lysine-rich 1
252	0	0.684903	0.482	0.129	0	Lateral ciliary cell	Bpl_scaf_59079-5.29	kinesin KIF16B isoform X4
253	0	0.684144	0.49	0.202	0	Lateral ciliary cell	Bpl_scaf_41288-1.7	Hexokinase type 2
254	0	0.682118	0.449	0.118	0	Lateral ciliary cell	Bpl_scaf_36085-1.9	transcription factor GATA-3-like isoform X2
255	0	0.67634	0.387	0.145	0	Lateral ciliary cell	Bpl_scaf_59225-0.1	---NA---
256	0	0.670794	0.441	0.103	0	Lateral ciliary cell	Bpl_scaf_54513-4.45	dynein heavy chain 3, axonemal-like
257	0	0.628231	0.469	0.144	0	Lateral ciliary cell	Bpl_scaf_40907-2.12	coiled-coil domain-containing 151-like
258	0	0.61443	0.382	0.097	0	Lateral ciliary cell	Bpl_scaf_47185-0.12	---NA---
259	0	0.614074	0.292	0.051	0	Lateral ciliary cell	Bpl_scaf_19931-0.8	Pancreatic secretory granule membrane major glyco GP2
260	0	0.613362	0.438	0.106	0	Lateral ciliary cell	Bpl_scaf_48232-3.25	dynein gamma chain, flagellar outer arm-like
261	0	0.611356	0.362	0.052	0	Lateral ciliary cell	Bpl_scaf_3403-0.6	dynein regulatory complex subunit 7-like
262	0	0.610997	0.439	0.127	0	Lateral ciliary cell	Bpl_scaf_18046-1.7	PERQ amino acid-rich with GYF domain-containing 2-like isoform X2
263	0	0.603506	0.297	0.068	0	Lateral ciliary cell	Bpl_scaf_62926-1.18	von Willebrand factor D and EGF domain-containing -like
264	0	0.59953	0.264	0.028	0	Lateral ciliary cell	Bpl_scaf_26203-1.28	flocculation FLO11-like
265	0	0.585402	0.371	0.092	0	Lateral ciliary cell	Bpl_scaf_62500-3.23	radial spoke head 1 homolog
266	0	0.581014	0.475	0.153	0	Lateral ciliary cell	Bpl_scaf_5428-9.9	cytosolic carboxypeptidase 2-like isoform X16
267	0	0.574659	0.505	0.228	0	Lateral ciliary cell	Bpl_scaf_34753-1.9	cytochrome c oxidase subunit 4 isoform 1, mitochondrial-like
268	0	0.573515	0.41	0.133	0	Lateral ciliary cell	Bpl_scaf_5539-1.27	tubulin polymerization-promoting family member 3-like
269	0	0.568553	0.374	0.078	0	Lateral ciliary cell	Bpl_scaf_15294-4.16	myosin-2 heavy chain-like
270	0	0.554539	0.434	0.136	0	Lateral ciliary cell	Bpl_scaf_31557-6.11	dynein heavy chain 2, axonemal isoform X1
271	0	0.552877	0.394	0.116	0	Lateral ciliary cell	Bpl_scaf_20603-1.11	cytochrome c oxidase subunit NDUFA4
272	0	0.551763	0.393	0.098	0	Lateral ciliary cell	Bpl_scaf_47430-7.16	abnormal spindle-like microcephaly-associated homolog isoform X3
273	0	0.549403	0.317	0.05	0	Lateral ciliary cell	Bpl_scaf_49759-11.15	PREDICTED: uncharacterized protein LOC105324877 isoform X2
274	0	0.547778	0.377	0.094	0	Lateral ciliary cell	Bpl_scaf_38784-6.9	IQ domain-containing G-like
275	0	0.547659	0.405	0.116	0	Lateral ciliary cell	Bpl_scaf_57616-2.23	PREDICTED: uncharacterized protein LOC105348061 isoform X3
276	0	0.546397	0.416	0.159	0	Lateral ciliary cell	Bpl_scaf_5285-5.10	dynein light chain 2, cytoplasmic
277	0	0.545378	0.463	0.191	0	Lateral ciliary cell	Bpl_scaf_30688-0.7	phosphate carrier , mitochondrial-like isoform X1
278	0	0.540713	0.383	0.098	0	Lateral ciliary cell	Bpl_scaf_28862-8.18	cilia- and flagella-associated 46-like, partial
279	0	0.534666	0.397	0.102	0	Lateral ciliary cell	Bpl_scaf_28660-7.37	sperm-associated antigen 17-like isoform X6
280	0	0.53393	0.428	0.12	0	Lateral ciliary cell	Bpl_scaf_58886-2.27	---NA---
281	0	0.529606	0.296	0.025	0	Lateral ciliary cell	Bpl_scaf_33783-1.105	calmodulin 12
282	0	0.521704	0.327	0.057	0	Lateral ciliary cell	Bpl_scaf_5489-2.7	von Willebrand factor A domain-containing 3B
283	0	0.521524	0.356	0.094	0	Lateral ciliary cell	Bpl_scaf_58266-20.17	regulator of G- signaling 22-like isoform X12
284	0	0.51953	0.274	0.012	0	Lateral ciliary cell	Bpl_scaf_55568-2.20	golgin subfamily A member 6 10
285	0	0.509107	0.363	0.091	0	Lateral ciliary cell	Bpl_scaf_36689-9.10	radial spoke head 4 homolog A-like
286	0	0.506011	0.345	0.078	0	Lateral ciliary cell	Bpl_scaf_28083-4.9	cyclin-dependent kinase-like 2 isoform X2
287	0	0.502592	0.266	0.044	0	Lateral ciliary cell	Bpl_scaf_1831-0.12	---NA---
288	0	0.487777	0.362	0.096	0	Lateral ciliary cell	Bpl_scaf_49352-6.23	cilia- and flagella-associated 58
289	0	0.487548	0.254	0.033	0	Lateral ciliary cell	Bpl_scaf_25767-1.18	Kyphoscoliosis peptidase
290	0	0.486712	0.366	0.102	0	Lateral ciliary cell	Bpl_scaf_59648-6.11	cilia- and flagella-associated 54-like
291	0	0.484693	0.388	0.118	0	Lateral ciliary cell	Bpl_scaf_33098-2.18	cilia- and flagella-associated 57-like
292	0	0.484594	0.344	0.082	0	Lateral ciliary cell	Bpl_scaf_28083-3.5	Spectrin beta chain, erythrocyte
293	0	0.477805	0.307	0.054	0	Lateral ciliary cell	Bpl_scaf_31501-17.30	dynein heavy chain 1, axonemal
294	0	0.475957	0.281	0.011	0	Lateral ciliary cell	Bpl_scaf_30366-2.14	PREDICTED: uncharacterized protein C9orf117 homolog
295	0	0.474875	0.308	0.095	0	Lateral ciliary cell	Bpl_scaf_1581-3.14	titin-like isoform X9
296	0	0.474127	0.293	0.044	0	Lateral ciliary cell	Bpl_scaf_50330-4.27	lipopolysaccharide-induced TNF-alpha factor
297	0	0.471353	0.272	0.06	0	Lateral ciliary cell	Bpl_scaf_30291-12.8	hypothetical protein CGI_10018121
298	0	0.469135	0.297	0.055	0	Lateral ciliary cell	Bpl_scaf_41129-2.23	influenza virus NS1A-binding homolog A-like
299	0	0.463384	0.316	0.067	0	Lateral ciliary cell	Bpl_scaf_29696-3.9	cilia- and flagella-associated 53-like
300	0	0.456287	0.382	0.117	0	Lateral ciliary cell	Bpl_scaf_6018-1.10	coiled-coil domain-containing 181-like isoform X1
301	0	0.455889	0.303	0.065	0	Lateral ciliary cell	Bpl_scaf_63617-2.39	tektin A1
302	0	0.454319	0.331	0.074	0	Lateral ciliary cell	Bpl_scaf_59830-2.15	meiosis-specific nuclear structural 1-like
303	0	0.449392	0.31	0.067	0	Lateral ciliary cell	Bpl_scaf_44296-6.9	coiled-coil domain-containing 37-like isoform X1
304	0	0.446609	0.371	0.111	0	Lateral ciliary cell	Bpl_scaf_30291-19.3	ankyrin repeat domain-containing 11-like
305	0	0.440252	0.303	0.066	0	Lateral ciliary cell	Bpl_scaf_26407-4.12	EF-hand calcium-binding domain-containing 6
306	0	0.43975	0.381	0.143	0	Lateral ciliary cell	Bpl_scaf_32311-0.5	---NA---
307	0	0.435814	0.292	0.062	0	Lateral ciliary cell	Bpl_scaf_48197-1.11	EF-hand calcium-binding domain-containing 5
308	0	0.434916	0.328	0.093	0	Lateral ciliary cell	Bpl_scaf_17081-2.13	cytosolic carboxypeptidase 2-like
309	0	0.429991	0.335	0.096	0	Lateral ciliary cell	Bpl_scaf_57484-10.4	MAATS1-like isoform X1
310	0	0.428644	0.363	0.125	0	Lateral ciliary cell	Bpl_scaf_19671-7.10	WD repeat-containing 16
311	0	0.42635	0.321	0.08	0	Lateral ciliary cell	Bpl_scaf_40762-5.16	DPY30 domain-containing 1
312	0	0.418764	0.338	0.109	0	Lateral ciliary cell	Bpl_scaf_36179-2.7	centrosomal of 152 kDa-like
313	0	0.414898	0.37	0.113	0	Lateral ciliary cell	Bpl_scaf_4947-10.10	PREDICTED: uncharacterized protein LOC105319401 isoform X7
314	0	0.41045	0.28	0.062	0	Lateral ciliary cell	Bpl_scaf_13055-1.20	Cytosolic carboxypeptidase 2
315	0	0.406718	0.316	0.09	0	Lateral ciliary cell	Bpl_scaf_10095-1.8	PREDICTED: uncharacterized protein LOC105326112 isoform X1
316	3.02e-302	0.603266	0.366	0.135	4.1e-298	Lateral ciliary cell	Bpl_scaf_1856-1.9	Chitin synthase C
317	3.17e-298	0.427682	0.487	0.204	4.3e-294	Lateral ciliary cell	Bpl_scaf_26757-3.10	centrosome-associated 350
318	3.28e-298	0.517511	0.438	0.186	4.44e-294	Lateral ciliary cell	Bpl_scaf_59363-0.6	ATP synthase subunit beta, mitochondrial
319	1.67e-295	0.440804	0.497	0.213	2.26e-291	Lateral ciliary cell	Bpl_scaf_55342-0.9	trichohyalin-like isoform X2
320	4.48e-292	0.863594	0.878	0.63	6.07e-288	Lateral ciliary cell	Bpl_scaf_13236-2.10	Soma ferritin
321	3.73e-285	0.42992	0.316	0.11	5.05e-281	Lateral ciliary cell	Bpl_scaf_1581-3.13	muscle M-line assembly unc-89-like isoform X3
322	1.63e-266	0.495208	0.676	0.361	2.21e-262	Lateral ciliary cell	Bpl_scaf_50887-8.25	centrosome and spindle pole-associated 1-like
323	9.35e-263	0.509255	0.53	0.257	1.27e-258	Lateral ciliary cell	Bpl_scaf_29450-1.2	steroid hormone receptor ERR2-like isoform X1
324	2.3e-252	0.485956	0.328	0.122	3.12e-248	Lateral ciliary cell	Bpl_scaf_14775-0.3	PREDICTED: uncharacterized protein LOC105324435 isoform X10
325	3.65e-251	0.624539	0.711	0.429	4.95e-247	Lateral ciliary cell	Bpl_scaf_63703-4.30	cytochrome c
326	1.71e-238	0.463854	0.735	0.438	2.32e-234	Lateral ciliary cell	Bpl_scaf_33596-10.18	golgin subfamily B member 1-like isoform X3
327	4.58e-238	0.734998	0.469	0.223	6.21e-234	Lateral ciliary cell	Bpl_scaf_29041-0.21	---NA---
328	6.05e-231	0.417224	0.656	0.353	8.2e-227	Lateral ciliary cell	Bpl_scaf_28870-6.10	myosin-2 heavy chain-like
329	1.16e-227	0.493333	0.363	0.15	1.57e-223	Lateral ciliary cell	Bpl_scaf_59225-0.0	kelch 29 isoform X1
330	3.4e-225	0.564832	0.859	0.62	4.61e-221	Lateral ciliary cell	Bpl_scaf_2723-4.12	nesprin-1-like isoform X3
331	1.83e-219	0.41398	0.665	0.369	2.47e-215	Lateral ciliary cell	Bpl_scaf_56338-1.13	centriolin-like isoform X1
332	9.3e-210	0.486212	0.355	0.152	1.26e-205	Lateral ciliary cell	Bpl_scaf_63069-0.3	---NA---
333	1.8e-208	0.503186	0.628	0.361	2.44e-204	Lateral ciliary cell	Bpl_scaf_61662-2.9	geraniol dehydrogenase 1-like isoform X2
334	3.1e-206	0.479418	0.363	0.158	4.2e-202	Lateral ciliary cell	Bpl_scaf_63069-1.6	---NA---
335	6.51e-206	0.576797	0.378	0.17	8.82e-202	Lateral ciliary cell	Bpl_scaf_25425-0.8	---NA---
336	9.08e-206	0.583239	0.484	0.244	1.23e-201	Lateral ciliary cell	Bpl_scaf_10008-0.27	---NA---
337	1.26e-201	1.32539	0.724	0.504	1.71e-197	Lateral ciliary cell	Bpl_scaf_63069-1.25	---NA---
338	2.09e-200	0.546084	0.363	0.16	2.83e-196	Lateral ciliary cell	Bpl_scaf_44514-0.0	kelch 29 isoform X1
339	3.96e-199	0.420886	0.459	0.231	5.37e-195	Lateral ciliary cell	Bpl_scaf_7091-1.9	DIS3-like exonuclease 2
340	1.2e-183	0.427827	0.545	0.3	1.62e-179	Lateral ciliary cell	Bpl_scaf_53430-3.8	---NA---
341	1.63e-176	0.412898	0.379	0.177	2.22e-172	Lateral ciliary cell	Bpl_scaf_33810-1.25	---NA---
342	5e-169	0.43415	0.314	0.138	6.77e-165	Lateral ciliary cell	Bpl_scaf_30977-2.7	PREDICTED: uncharacterized protein LOC105317678 isoform X4
343	2.29e-149	1.46536	0.356	0.185	3.1e-145	Lateral ciliary cell	Bpl_scaf_62409-0.16	PREDICTED: uncharacterized protein LOC105333786 isoform X2
344	4.74e-142	0.437785	0.557	0.345	6.42e-138	Lateral ciliary cell	Bpl_scaf_22702-0.3	ADP,ATP carrier 3, mitochondrial-like
345	3.18e-141	0.668168	0.631	0.422	4.31e-137	Lateral ciliary cell	Bpl_scaf_25972-1.4	hypothetical protein CGI_10021602
346	3.67e-130	0.709828	0.645	0.437	4.97e-126	Lateral ciliary cell	Bpl_scaf_58954-2.7	Transient receptor potential cation channel subfamily M member 3
347	0	3.69545	0.934	0.054	0	Smooth muscle cell	Bpl_scaf_33659-0.9	low-density lipo receptor-related 2
348	0	3.07499	0.877	0.045	0	Smooth muscle cell	Bpl_scaf_33659-0.13	low-density lipo receptor,
349	0	2.8919	0.901	0.038	0	Smooth muscle cell	Bpl_scaf_2971-1.17	---NA---
350	0	2.88437	0.879	0.029	0	Smooth muscle cell	Bpl_scaf_2971-0.17	low-density lipo receptor
351	0	1.40051	0.653	0.01	0	Smooth muscle cell	Bpl_scaf_30045-0.7	low-density lipo receptor-related 2-like
352	0	0.667482	0.342	0.005	0	Smooth muscle cell	Bpl_scaf_58095-0.33	---NA---
353	2.16e-137	0.54722	0.285	0.044	2.92e-133	Smooth muscle cell	Bpl_scaf_9507-2.17	PC3-like endoprotease variant B
354	8.77e-84	0.823695	0.355	0.095	1.19e-79	Smooth muscle cell	Bpl_scaf_29477-5.10	angiotensin-converting enzyme-like
355	8.51e-67	0.577349	0.359	0.108	1.15e-62	Smooth muscle cell	Bpl_scaf_38703-10.8	Tubulin beta chain
356	1.26e-53	0.631078	0.281	0.085	1.71e-49	Smooth muscle cell	Bpl_scaf_36459-0.6	PREDICTED: uncharacterized protein LOC105336868
357	3.27e-41	0.651526	0.548	0.282	4.43e-37	Smooth muscle cell	Bpl_scaf_56339-14.6	PREDICTED: uncharacterized protein LOC105326108 isoform X5
358	7.86e-34	0.674385	0.56	0.324	1.06e-29	Smooth muscle cell	Bpl_scaf_31501-17.32	cyclic AMP-responsive element-binding 3 2 isoform X1
359	7.99e-33	0.613703	0.429	0.209	1.08e-28	Smooth muscle cell	Bpl_scaf_15185-1.7	myb P isoform X17
360	1.3e-30	0.552438	0.683	0.444	1.77e-26	Smooth muscle cell	Bpl_scaf_22362-6.9	rootletin-like isoform X7
361	4.98e-29	0.767984	0.636	0.435	6.74e-25	Smooth muscle cell	Bpl_scaf_48945-0.2	zinc finger MYM-type 4-like
362	2.98e-21	0.512875	0.757	0.589	4.04e-17	Smooth muscle cell	Bpl_scaf_54410-1.12	polyadenylate-binding 4-like
363	1.28e-20	0.47618	0.588	0.382	1.74e-16	Smooth muscle cell	Bpl_scaf_56354-7.8	Reticulocyte-binding 2 a
364	2.04e-20	0.525045	0.594	0.389	2.77e-16	Smooth muscle cell	Bpl_scaf_63665-1.12	Cytadherence high molecular weight 2
365	6.77e-20	0.414645	0.829	0.644	9.18e-16	Smooth muscle cell	Bpl_scaf_13236-2.10	Soma ferritin
366	0	3.45972	0.966	0.279	0	Intercalary cell	Bpl_scaf_55568-3.5	trichohyalin-like isoform X11
367	0	3.13968	0.956	0.431	0	Intercalary cell	Bpl_scaf_22362-6.9	rootletin-like isoform X7
368	0	1.89099	0.889	0.533	0	Intercalary cell	Bpl_scaf_50887-2.10	microtubule-actin cross-linking factor 1, isoforms 1 2 3 5-like isoform X5
369	0	1.74308	0.681	0.026	0	Intercalary cell	Bpl_scaf_2581-4.36	Intermediate filament tail domain-containing 1
370	0	1.61615	0.69	0.135	0	Intercalary cell	Bpl_scaf_59079-5.29	kinesin KIF16B isoform X4
371	0	1.59623	0.937	0.626	0	Intercalary cell	Bpl_scaf_2723-4.12	nesprin-1-like isoform X3
372	0	1.49157	0.695	0.122	0	Intercalary cell	Bpl_scaf_58886-2.27	---NA---
373	0	1.3716	0.826	0.371	0	Intercalary cell	Bpl_scaf_56354-7.8	Reticulocyte-binding 2 a
374	0	1.34043	0.476	0.04	0	Intercalary cell	Bpl_scaf_63348-6.2	cell wall integrity and stress response component 4-like
375	0	1.33897	0.68	0.197	0	Intercalary cell	Bpl_scaf_15185-1.7	myb P isoform X17
376	0	1.32239	0.763	0.309	0	Intercalary cell	Bpl_scaf_2723-3.16	nesprin-1-like isoform X2
377	0	1.29219	0.425	0.066	0	Intercalary cell	Bpl_scaf_38273-0.6	inhibitor of apoptosis
378	0	1.27765	0.43	0.07	0	Intercalary cell	Bpl_scaf_64881-0.7	---NA---
379	0	1.17534	0.393	0.057	0	Intercalary cell	Bpl_scaf_16610-1.17	inhibitor of apoptosis
380	0	1.09382	0.559	0.116	0	Intercalary cell	Bpl_scaf_4947-10.10	PREDICTED: uncharacterized protein LOC105319401 isoform X7
381	0	1.05602	0.552	0.127	0	Intercalary cell	Bpl_scaf_49856-0.2	RNA binding fox-1 homolog 2-like isoform X2
382	0	1.02885	0.636	0.237	0	Intercalary cell	Bpl_scaf_268-1.11	dynein heavy chain 5, axonemal
383	0	1.02553	0.473	0.023	0	Intercalary cell	Bpl_scaf_40595-5.30	Transcription factor Sox-8
384	0	1.01875	0.547	0.156	0	Intercalary cell	Bpl_scaf_48036-0.8	G1 S-specific cyclin-D2
385	0	0.877415	0.528	0.133	0	Intercalary cell	Bpl_scaf_18893-3.23	testis-specific gene 10 -like isoform X3
386	0	0.86512	0.618	0.224	0	Intercalary cell	Bpl_scaf_26364-0.10	kinesin KIF28P
387	0	0.85583	0.439	0.114	0	Intercalary cell	Bpl_scaf_36179-2.7	centrosomal of 152 kDa-like
388	0	0.819599	0.47	0.121	0	Intercalary cell	Bpl_scaf_53159-3.11	sushi, von Willebrand factor type A, EGF and pentraxin domain-containing 1 isoform X2
389	0	0.762128	0.399	0.049	0	Intercalary cell	Bpl_scaf_48156-1.12	Kinesin KIF6
390	0	0.747725	0.414	0.101	0	Intercalary cell	Bpl_scaf_58266-20.17	regulator of G- signaling 22-like isoform X12
391	0	0.746964	0.451	0.129	0	Intercalary cell	Bpl_scaf_36085-1.9	transcription factor GATA-3-like isoform X2
392	0	0.724607	0.405	0.093	0	Intercalary cell	Bpl_scaf_58896-18.8	mucin-12-like isoform X1
393	0	0.717321	0.377	0.008	0	Intercalary cell	Bpl_scaf_26452-0.14	---NA---
394	0	0.661993	0.302	0.026	0	Intercalary cell	Bpl_scaf_43288-1.14	hypothetical protein CGI_10008202
395	0	0.618313	0.34	0.07	0	Intercalary cell	Bpl_scaf_10800-1.15	kinesin KIF28P isoform X5
396	0	0.61223	0.398	0.097	0	Intercalary cell	Bpl_scaf_3306-2.3	stress response nst1-like
397	0	0.610603	0.342	0.058	0	Intercalary cell	Bpl_scaf_38276-3.12	RNA-binding Musashi homolog 2-like isoform X2
398	0	0.596513	0.316	0.015	0	Intercalary cell	Bpl_scaf_55067-4.14	leucine-rich repeat-containing 74B-like
399	0	0.570021	0.322	0.047	0	Intercalary cell	Bpl_scaf_96-4.12	von Willebrand factor A domain-containing 3B isoform X1
400	0	0.531171	0.268	0.017	0	Intercalary cell	Bpl_scaf_60539-3.10	couch potato-like isoform X8
401	0	0.522934	0.28	0.009	0	Intercalary cell	Bpl_scaf_37795-2.5	CBL-interacting serine threonine- kinase 5-like
402	0	0.494378	0.26	0.028	0	Intercalary cell	Bpl_scaf_25767-4.6	paramyosin-like isoform X1
403	0	0.45985	0.261	0.005	0	Intercalary cell	Bpl_scaf_42986-0.28	PREDICTED: uncharacterized protein LOC105321884 isoform X3
404	7.29e-272	0.631843	0.441	0.133	9.88e-268	Intercalary cell	Bpl_scaf_57424-6.1	secreted frizzled-related 5-like
405	2.06e-263	0.553156	0.338	0.087	2.8e-259	Intercalary cell	Bpl_scaf_34414-5.7	Cyclin-dependent kinase-like 5
406	1.37e-262	0.525375	0.292	0.067	1.85e-258	Intercalary cell	Bpl_scaf_7690-2.6	dystonin-like isoform X1
407	6.17e-260	1.27974	0.909	0.688	8.37e-256	Intercalary cell	Bpl_scaf_15294-6.19	spectrin beta chain, non-erythrocytic 5-like isoform X2
408	7.45e-256	0.524332	0.326	0.083	1.01e-251	Intercalary cell	Bpl_scaf_62428-5.9	microtubule-associated futsch-like isoform X1
409	1.22e-242	0.906877	0.658	0.287	1.65e-238	Intercalary cell	Bpl_scaf_36964-11.16	dynein heavy chain 3, axonemal-like
410	1.2e-237	0.753039	0.468	0.16	1.63e-233	Intercalary cell	Bpl_scaf_44428-6.13	PREDICTED: uncharacterized protein LOC105342695 isoform X2
411	2.56e-235	0.769384	0.687	0.308	3.47e-231	Intercalary cell	Bpl_scaf_57259-5.3	cytoplasmic intermediate filament A
412	3.58e-232	0.825327	0.629	0.271	4.85e-228	Intercalary cell	Bpl_scaf_13642-5.8	sodium- and chloride-dependent glycine transporter 1-like
413	4.8e-225	0.529798	0.389	0.12	6.51e-221	Intercalary cell	Bpl_scaf_64138-1.1	peripheral-type benzodiazepine receptor-associated 1-like isoform X14
414	1.66e-223	0.673004	0.444	0.153	2.25e-219	Intercalary cell	Bpl_scaf_7690-2.7	dystonin-like isoform X1
415	3.66e-222	0.686209	0.461	0.159	4.96e-218	Intercalary cell	Bpl_scaf_61985-5.10	filamin -1
416	1.37e-215	0.524215	0.342	0.1	1.85e-211	Intercalary cell	Bpl_scaf_54629-2.9	centrosomal of 295 kDa-like isoform X16
417	1.18e-194	0.555799	0.45	0.167	1.61e-190	Intercalary cell	Bpl_scaf_9000-7.14	myosin-IIIb-like isoform X1
418	1.12e-192	0.599937	0.551	0.232	1.51e-188	Intercalary cell	Bpl_scaf_38338-8.4	LIM and calponin homology domains-containing 1-like isoform X3
419	9.32e-190	0.882141	0.888	0.614	1.26e-185	Intercalary cell	Bpl_scaf_25973-3.4	---NA---
420	1.36e-188	1.04913	0.737	0.422	1.84e-184	Intercalary cell	Bpl_scaf_48777-1.5	Krueppel-like factor 5
421	2.71e-182	0.493067	0.375	0.128	3.67e-178	Intercalary cell	Bpl_scaf_3520-8.8	forkhead-associated domain-containing 1-like
422	1.75e-179	0.586987	0.353	0.117	2.38e-175	Intercalary cell	Bpl_scaf_54651-5.17	PREDICTED: myophilin-like
423	1.81e-179	0.56113	0.437	0.165	2.45e-175	Intercalary cell	Bpl_scaf_5428-9.9	cytosolic carboxypeptidase 2-like isoform X16
424	2.04e-178	0.791965	0.362	0.128	2.76e-174	Intercalary cell	Bpl_scaf_16239-5.23	transcription factor fos-like 1
425	6.06e-175	0.607281	0.604	0.274	8.21e-171	Intercalary cell	Bpl_scaf_46488-4.14	cilia- and flagella-associated 44-like
426	2.01e-174	0.69269	0.353	0.122	2.73e-170	Intercalary cell	Bpl_scaf_14560-0.8	cAMP-responsive element-binding -like 2
427	2.07e-173	0.696277	0.702	0.362	2.8e-169	Intercalary cell	Bpl_scaf_28870-6.10	myosin-2 heavy chain-like
428	1.06e-165	0.454582	0.36	0.126	1.44e-161	Intercalary cell	Bpl_scaf_54193-0.28	Alstrom syndrome 1
429	3.69e-163	0.418364	0.344	0.117	5e-159	Intercalary cell	Bpl_scaf_27314-2.14	PREDICTED: uncharacterized protein LOC105330618 isoform X4
430	8.55e-150	0.693482	0.746	0.438	1.16e-145	Intercalary cell	Bpl_scaf_35727-1.14	myosin-10-like isoform X17
431	2.99e-135	0.651028	0.78	0.489	4.05e-131	Intercalary cell	Bpl_scaf_53908-4.17	tubulin alpha-1A chain
432	6.63e-135	0.592034	0.68	0.371	8.99e-131	Intercalary cell	Bpl_scaf_50887-8.25	centrosome and spindle pole-associated 1-like
433	4.75e-130	0.411665	0.467	0.206	6.43e-126	Intercalary cell	Bpl_scaf_4947-11.17	IQ and AAA domain-containing 1-like isoform X2
434	8.16e-127	0.698585	0.786	0.512	1.11e-122	Intercalary cell	Bpl_scaf_5538-4.10	TPM_PERVI ame: Full=Tropomyosin
435	1.08e-126	0.445244	0.418	0.177	1.47e-122	Intercalary cell	Bpl_scaf_7079-3.11	sperm flagellar 2-like isoform X2
436	4.82e-123	0.519578	0.681	0.379	6.53e-119	Intercalary cell	Bpl_scaf_56338-1.13	centriolin-like isoform X1
437	5.78e-118	0.443054	0.576	0.291	7.83e-114	Intercalary cell	Bpl_scaf_48229-2.24	hydrocephalus-inducing homolog isoform X2
438	1.84e-109	0.52512	0.64	0.364	2.49e-105	Intercalary cell	Bpl_scaf_50772-1.17	afadin-like isoform X2
439	4.6e-98	0.794357	0.626	0.362	6.23e-94	Intercalary cell	Bpl_scaf_17778-1.17	dynein heavy chain 10, axonemal-like isoform X1
440	1.52e-93	0.432312	0.435	0.215	2.07e-89	Intercalary cell	Bpl_scaf_26757-3.10	centrosome-associated 350
441	1.7e-92	0.449076	0.882	0.637	2.3e-88	Intercalary cell	Bpl_scaf_58896-4.11	chromodomain-helicase-DNA-binding 4-like isoform X3
442	3.4e-89	0.769937	0.68	0.443	4.61e-85	Intercalary cell	Bpl_scaf_58954-2.7	Transient receptor potential cation channel subfamily M member 3
443	4e-78	0.409817	0.571	0.335	5.42e-74	Intercalary cell	Bpl_scaf_59079-12.14	spectrin beta chain-like isoform X1
444	1.14e-77	0.42495	0.7	0.449	1.54e-73	Intercalary cell	Bpl_scaf_33596-10.18	golgin subfamily B member 1-like isoform X3
445	3.43e-62	0.455126	0.689	0.466	4.65e-58	Intercalary cell	Bpl_scaf_21209-0.8	actin, cytoplasmic
446	6.1e-38	0.465108	0.359	0.223	8.27e-34	Intercalary cell	Bpl_scaf_41063-6.8	lipoxygenase homology domain-containing 1-like isoform X1

## Sheet: Supplementary File 1d
Supplementary File 1d. Identified cell markers of the proliferation cells, including the Posterior end budding zone, the Dorsal end proliferation cell, and the Ventral end proliferation cell.
	p_val	avg_log2FC	pct.1	pct.2	p_val_adj	cluster	gene	Description
1	0	1.20773	0.689	0.488	0	Posterior end budding zone	Bpl_scaf_61993-0.4	sushi, von Willebrand factor type A, EGF and pentraxin domain-containing 1 isoform X1
2	0	1.09619	0.513	0.259	0	Posterior end budding zone	Bpl_scaf_41724-1.2	RNA-directed DNA polymerase from transposon BS
3	0	1.08383	0.508	0.229	0	Posterior end budding zone	Bpl_scaf_36964-11.16	dynein heavy chain 3, axonemal-like
4	0	1.07022	0.511	0.309	0	Posterior end budding zone	Bpl_scaf_19571-0.5	deleted in malignant brain tumors 1 -like
5	0	1.05729	0.638	0.479	0	Posterior end budding zone	Bpl_scaf_63069-1.25	---NA---
6	0	0.986208	0.536	0.344	0	Posterior end budding zone	Bpl_scaf_63665-1.12	Cytadherence high molecular weight 2
7	0	0.960902	0.501	0.317	0	Posterior end budding zone	Bpl_scaf_60067-11.23	Cytadherence high molecular weight 2
8	0	0.873991	0.769	0.592	0	Posterior end budding zone	Bpl_scaf_2723-4.12	nesprin-1-like isoform X3
9	0	0.801032	0.303	0.141	0	Posterior end budding zone	Bpl_scaf_25269-0.15	PREDICTED: uncharacterized protein LOC105346378
10	0	0.739463	0.287	0.131	0	Posterior end budding zone	Bpl_scaf_44428-6.13	PREDICTED: uncharacterized protein LOC105342695 isoform X2
11	0	0.729653	0.548	0.414	0	Posterior end budding zone	Bpl_scaf_35727-1.14	myosin-10-like isoform X17
12	0	0.715682	0.357	0.213	0	Posterior end budding zone	Bpl_scaf_268-1.11	dynein heavy chain 5, axonemal
13	0	0.686489	0.422	0.272	0	Posterior end budding zone	Bpl_scaf_60289-3.50	ankyrin repeat domain-containing 26-like isoform X2
14	0	0.638179	0.617	0.504	0	Posterior end budding zone	Bpl_scaf_681-3.14	rho guanine nucleotide exchange factor 11-like isoform X18
15	0	0.62962	0.406	0.272	0	Posterior end budding zone	Bpl_scaf_60289-3.51	ankyrin repeat domain-containing 26-like isoform X2
16	2.22e-300	0.720407	0.288	0.168	3.01e-296	Posterior end budding zone	Bpl_scaf_60176-1.21	hypothetical protein CGI_10001573
17	1.51e-297	0.648465	0.39	0.259	2.04e-293	Posterior end budding zone	Bpl_scaf_33543-0.10	src kinase-associated phospho 1-like
18	3.85e-278	0.649931	0.636	0.527	5.22e-274	Posterior end budding zone	Bpl_scaf_6172-0.3	baculoviral IAP repeat-containing 3-like
19	3.44e-260	0.568253	0.412	0.292	4.66e-256	Posterior end budding zone	Bpl_scaf_2723-3.16	nesprin-1-like isoform X2
20	5.54e-254	0.62197	0.305	0.182	7.51e-250	Posterior end budding zone	Bpl_scaf_190-0.4	MAM and LDL-receptor class A domain-containing 2-like
21	2.95e-253	0.643571	0.252	0.146	3.99e-249	Posterior end budding zone	Bpl_scaf_724-3.6	---NA---
22	2.26e-248	0.444934	0.746	0.677	3.06e-244	Posterior end budding zone	Bpl_scaf_15294-6.19	spectrin beta chain, non-erythrocytic 5-like isoform X2
23	1.43e-247	0.625272	0.299	0.178	1.93e-243	Posterior end budding zone	Bpl_scaf_15410-0.9	MAM and LDL-receptor class A domain-containing 2-like
24	2.09e-229	0.67666	0.344	0.231	2.83e-225	Posterior end budding zone	Bpl_scaf_10008-0.27	---NA---
25	1.38e-218	0.634463	0.319	0.203	1.87e-214	Posterior end budding zone	Bpl_scaf_52188-1.15	deleted in malignant brain tumors 1 -like
26	1.38e-216	0.556966	0.332	0.223	1.87e-212	Posterior end budding zone	Bpl_scaf_2733-0.6	sushi, von Willebrand factor type A, EGF and pentraxin domain-containing 1-like
27	4.75e-214	0.535827	0.451	0.351	6.44e-210	Posterior end budding zone	Bpl_scaf_38089-2.12	unconventional myosin-XV-like isoform X1
28	3.82e-209	0.566908	0.265	0.165	5.18e-205	Posterior end budding zone	Bpl_scaf_33810-1.25	---NA---
29	1.77e-197	0.460084	0.652	0.593	2.4e-193	Posterior end budding zone	Bpl_scaf_45183-6.6	winged eye-like isoform X1
30	4.38e-197	0.488583	0.37	0.27	5.94e-193	Posterior end budding zone	Bpl_scaf_29333-6.25	Switch-associated 70
31	9.47e-193	0.672701	0.335	0.238	1.28e-188	Posterior end budding zone	Bpl_scaf_40897-0.6	---NA---
32	1.67e-187	0.965703	0.45	0.343	2.27e-183	Posterior end budding zone	Bpl_scaf_17778-1.17	dynein heavy chain 10, axonemal-like isoform X1
33	3.31e-186	0.468053	0.297	0.2	4.48e-182	Posterior end budding zone	Bpl_scaf_30366-7.9	SH3 domain-binding 2-like
34	1.96e-175	0.479912	0.294	0.203	2.66e-171	Posterior end budding zone	Bpl_scaf_9704-7.6	dual specificity phosphatase 7-like
35	4.98e-174	0.440107	0.587	0.513	6.75e-170	Posterior end budding zone	Bpl_scaf_1894-1.45	E3 ubiquitin- ligase RNF213-like
36	2.76e-166	0.496067	0.437	0.351	3.74e-162	Posterior end budding zone	Bpl_scaf_28870-6.10	myosin-2 heavy chain-like
37	9.27e-165	0.571027	0.498	0.417	1.26e-160	Posterior end budding zone	Bpl_scaf_48945-0.2	zinc finger MYM-type 4-like
38	1.26e-162	0.492047	0.515	0.437	1.71e-158	Posterior end budding zone	Bpl_scaf_33596-10.18	golgin subfamily B member 1-like isoform X3
39	1.13e-158	0.469103	0.452	0.366	1.53e-154	Posterior end budding zone	Bpl_scaf_56338-1.13	centriolin-like isoform X1
40	1.98e-156	0.490108	0.776	0.715	2.68e-152	Posterior end budding zone	Bpl_scaf_15404-0.0	---NA---
41	2.87e-143	0.478982	0.351	0.267	3.89e-139	Posterior end budding zone	Bpl_scaf_26228-4.5	Kinesin KIF21A
42	3.44e-141	0.419099	0.551	0.486	4.66e-137	Posterior end budding zone	Bpl_scaf_7653-2.14	MLP1-like isoform X4
43	9.33e-140	0.437121	0.328	0.245	1.26e-135	Posterior end budding zone	Bpl_scaf_57007-3.16	myoferlin-like isoform X5
44	9.94e-138	0.440557	0.348	0.272	1.35e-133	Posterior end budding zone	Bpl_scaf_1372-10.30	delta-N p63 p73
45	6.21e-130	0.438298	0.642	0.614	8.42e-126	Posterior end budding zone	Bpl_scaf_25973-3.4	---NA---
46	1.1e-129	0.669413	0.322	0.243	1.48e-125	Posterior end budding zone	Bpl_scaf_25165-3.8	caspase
47	1.55e-120	0.418019	0.287	0.213	2.1e-116	Posterior end budding zone	Bpl_scaf_10020-0.26	androglobin-like isoform X17
48	1.54e-116	0.465382	0.29	0.216	2.09e-112	Posterior end budding zone	Bpl_scaf_3829-4.21	Serine threonine- kinase 36
49	1.4e-108	0.591676	0.449	0.373	1.9e-104	Posterior end budding zone	Bpl_scaf_19166-1.14	PREDICTED: uncharacterized protein LOC105328034
50	6.4e-101	0.443532	0.384	0.329	8.67e-97	Posterior end budding zone	Bpl_scaf_28512-0.8	---NA---
51	2.36e-99	0.442781	0.412	0.349	3.19e-95	Posterior end budding zone	Bpl_scaf_1-0.2	heat shock 70 kDa 12A-like
52	3.7e-94	0.419379	0.498	0.427	5.01e-90	Posterior end budding zone	Bpl_scaf_24225-0.12	caspase-7-like isoform X1
53	5.53e-93	0.42483	0.43	0.381	7.5e-89	Posterior end budding zone	Bpl_scaf_31501-7.9	methionine sulfoxide oxidase mical2b-like isoform #REF!
54	1.51e-41	0.614879	0.453	0.401	2.05e-37	Posterior end budding zone	Bpl_scaf_55952-0.12	---NA---
55	0	2.78259	0.906	0.377	0	Dorsal end proliferation cell	Bpl_scaf_56354-7.8	Reticulocyte-binding 2 a
56	0	2.30073	0.813	0.225	0	Dorsal end proliferation cell	Bpl_scaf_55333-2.10	1-phosphatidylinositol 4,5-bisphosphate phosphodiesterase beta-4-like, partial
57	0	2.17564	0.919	0.273	0	Dorsal end proliferation cell	Bpl_scaf_13642-5.8	sodium- and chloride-dependent glycine transporter 1-like
58	0	1.51511	0.637	0.119	0	Dorsal end proliferation cell	Bpl_scaf_61540-1.2	ETS-related transcription factor Elf-3-like
59	0	1.38111	0.755	0.221	0	Dorsal end proliferation cell	Bpl_scaf_48262-0.27	PREDICTED: uncharacterized protein LOC105344081 isoform X11
60	0	1.31879	0.354	0.013	0	Dorsal end proliferation cell	Bpl_scaf_4250-0.2	ceruloplasmin isoform X2
61	0	1.24066	0.534	0.08	0	Dorsal end proliferation cell	Bpl_scaf_41885-0.9	dual oxidase 2-like
62	0	1.09283	0.311	0.008	0	Dorsal end proliferation cell	Bpl_scaf_35148-0.28	von Willebrand factor D and EGF domain-containing -like
63	0	0.982578	0.462	0.065	0	Dorsal end proliferation cell	Bpl_scaf_2733-2.7	dual oxidase 2-like isoform X1
64	0	0.919245	0.58	0.116	0	Dorsal end proliferation cell	Bpl_scaf_1581-3.13	muscle M-line assembly unc-89-like isoform X3
65	0	0.837944	0.278	0.007	0	Dorsal end proliferation cell	Bpl_scaf_65435-0.14	Tripartite motif-containing 56
66	0	0.801787	0.307	0.008	0	Dorsal end proliferation cell	Bpl_scaf_52731-1.14	arginase-1 isoform X2
67	0	0.742304	0.426	0.045	0	Dorsal end proliferation cell	Bpl_scaf_7779-2.7	epithelial splicing regulatory 1-like isoform X1
68	0	0.70707	0.397	0.016	0	Dorsal end proliferation cell	Bpl_scaf_56142-0.12	probable serine threonine- kinase pats1
69	0	0.704264	0.262	0.01	0	Dorsal end proliferation cell	Bpl_scaf_63384-6.12	high-affinity choline transporter 1-like
70	0	0.543298	0.33	0.005	0	Dorsal end proliferation cell	Bpl_scaf_49408-1.10	PREDICTED: uncharacterized protein LOC106171955
71	0	0.445498	0.266	0.021	0	Dorsal end proliferation cell	Bpl_scaf_64954-3.3	zinc finger 181-like isoform X1
72	0	0.438609	0.256	0.014	0	Dorsal end proliferation cell	Bpl_scaf_51518-0.8	alkaline phosphatase, tissue-nonspecific isozyme isoform X1
73	5.34e-289	0.842105	0.513	0.102	7.24e-285	Dorsal end proliferation cell	Bpl_scaf_1581-3.14	titin-like isoform X9
74	1.06e-249	0.673295	0.43	0.082	1.44e-245	Dorsal end proliferation cell	Bpl_scaf_1581-3.10	titin-like isoform X9
75	1.25e-221	0.645926	0.384	0.074	1.69e-217	Dorsal end proliferation cell	Bpl_scaf_45534-4.8	V-type proton ATPase 116 kDa subunit a isoform 1-like isoform X1
76	4.05e-213	1.12108	0.76	0.284	5.49e-209	Dorsal end proliferation cell	Bpl_scaf_61711-5.11	quaking-B-like isoform X2
77	1.24e-204	0.479281	0.329	0.058	1.68e-200	Dorsal end proliferation cell	Bpl_scaf_7488-9.5	netrin receptor UNC5C-like isoform X1
78	3.25e-204	0.818304	0.58	0.164	4.41e-200	Dorsal end proliferation cell	Bpl_scaf_40888-4.12	unconventional myosin-IXa-like isoform X1
79	3.69e-181	0.952967	0.619	0.203	5.01e-177	Dorsal end proliferation cell	Bpl_scaf_36595-6.55	actin
80	1.22e-179	0.465313	0.342	0.069	1.66e-175	Dorsal end proliferation cell	Bpl_scaf_62499-0.4	tumor necrosis factor receptor superfamily member 16-like isoform X3
81	1.08e-170	1.28386	0.765	0.315	1.46e-166	Dorsal end proliferation cell	Bpl_scaf_41724-1.2	RNA-directed DNA polymerase from transposon BS
82	3.41e-170	0.680314	0.486	0.134	4.63e-166	Dorsal end proliferation cell	Bpl_scaf_36085-1.9	transcription factor GATA-3-like isoform X2
83	6.19e-166	0.468374	0.316	0.064	8.39e-162	Dorsal end proliferation cell	Bpl_scaf_52314-2.22	coiled-coil domain-containing 33-like
84	1.05e-163	0.448852	0.313	0.063	1.43e-159	Dorsal end proliferation cell	Bpl_scaf_16143-0.7	FCH and double SH3 domains 2-like isoform X6
85	3.25e-163	0.557107	0.416	0.104	4.41e-159	Dorsal end proliferation cell	Bpl_scaf_57519-1.16	cytospin-A-like isoform X2
86	9.41e-162	0.730808	0.554	0.175	1.28e-157	Dorsal end proliferation cell	Bpl_scaf_30291-10.2	Ras GTPase-activating IQGAP1
87	1.34e-156	0.872578	0.435	0.121	1.82e-152	Dorsal end proliferation cell	Bpl_scaf_60708-1.10	HRAS-like suppressor 2
88	1.9e-156	0.756337	0.611	0.206	2.58e-152	Dorsal end proliferation cell	Bpl_scaf_61879-1.16	zinc finger 91-like isoform X1
89	3.97e-137	0.519657	0.478	0.144	5.38e-133	Dorsal end proliferation cell	Bpl_scaf_3643-2.21	fibrous sheath CABYR-binding -like isoform X3
90	2.37e-136	0.573178	0.507	0.157	3.21e-132	Dorsal end proliferation cell	Bpl_scaf_38064-2.13	Dedicator of cytokinesis 2, partial
91	4.69e-136	0.420111	0.283	0.061	6.36e-132	Dorsal end proliferation cell	Bpl_scaf_55694-3.16	hemocyte -glutamine gamma-glutamyltransferase-like isoform X1
92	4.76e-134	0.883558	0.76	0.348	6.45e-130	Dorsal end proliferation cell	Bpl_scaf_42954-5.5	drebrin B isoform X2
93	2.29e-130	0.483593	0.414	0.117	3.11e-126	Dorsal end proliferation cell	Bpl_scaf_53773-7.12	apoptosis-inducing factor 3-like isoform X1
94	2.66e-129	0.411677	0.286	0.064	3.61e-125	Dorsal end proliferation cell	Bpl_scaf_46330-0.4	---NA---
95	4.52e-121	0.799779	0.385	0.113	6.13e-117	Dorsal end proliferation cell	Bpl_scaf_5398-0.38	trans-homoaconitate synthase
96	2.47e-119	0.51483	0.505	0.168	3.35e-115	Dorsal end proliferation cell	Bpl_scaf_45587-3.6	WD repeat-containing 59-like
97	3e-118	0.552537	0.538	0.188	4.07e-114	Dorsal end proliferation cell	Bpl_scaf_59459-1.14	dedicator of cytokinesis 9-like isoform X10
98	1.19e-117	0.484158	0.47	0.153	1.62e-113	Dorsal end proliferation cell	Bpl_scaf_54374-1.7	septin-7-like isoform X5
99	8.36e-117	0.50324	0.463	0.149	1.13e-112	Dorsal end proliferation cell	Bpl_scaf_40595-6.12	rab11 family-interacting 4A-like isoform X4
100	8.62e-117	0.511892	0.41	0.122	1.17e-112	Dorsal end proliferation cell	Bpl_scaf_22220-2.14	Sorting nexin-33
101	3.02e-116	0.704557	0.684	0.29	4.1e-112	Dorsal end proliferation cell	Bpl_scaf_29333-6.25	Switch-associated 70
102	6.71e-116	0.807565	0.748	0.353	9.1e-112	Dorsal end proliferation cell	Bpl_scaf_50876-9.2	vav-like isoform X7
103	1.87e-115	0.462346	0.397	0.117	2.53e-111	Dorsal end proliferation cell	Bpl_scaf_6373-7.5	FYVE, and PH domain-containing 2-like
104	2.63e-115	0.975052	0.287	0.072	3.56e-111	Dorsal end proliferation cell	Bpl_scaf_17010-0.28	heat shock 70 kDa 12A-like
105	3.56e-112	0.525278	0.44	0.143	4.82e-108	Dorsal end proliferation cell	Bpl_scaf_39658-1.21	tyrosine- phosphatase non-receptor type 11-like isoform X1
106	1.53e-111	0.680946	0.556	0.209	2.08e-107	Dorsal end proliferation cell	Bpl_scaf_53516-0.11	WD repeat and FYVE domain-containing 2-like
107	4.01e-103	0.531871	0.493	0.18	5.44e-99	Dorsal end proliferation cell	Bpl_scaf_33841-0.13	coronin-1B-like isoform X2
108	1.55e-100	0.485088	0.513	0.189	2.11e-96	Dorsal end proliferation cell	Bpl_scaf_14819-0.11	kinesin , (fragment), partial
109	6.7e-97	0.640229	0.692	0.318	9.08e-93	Dorsal end proliferation cell	Bpl_scaf_59490-0.7	neurobeachin-like isoform X4
110	7.77e-96	0.43475	0.414	0.14	1.05e-91	Dorsal end proliferation cell	Bpl_scaf_19122-1.5	---NA---
111	8.9e-95	0.74096	0.852	0.527	1.21e-90	Dorsal end proliferation cell	Bpl_scaf_681-3.14	rho guanine nucleotide exchange factor 11-like isoform X18
112	1.07e-88	0.462809	0.388	0.133	1.46e-84	Dorsal end proliferation cell	Bpl_scaf_17051-23.15	gelsolin 2
113	2.12e-88	0.479447	0.5	0.195	2.87e-84	Dorsal end proliferation cell	Bpl_scaf_30166-0.16	type I inositol 1,4,5-trisphosphate 5-phosphatase-like isoform X1
114	3.6e-88	0.537742	0.606	0.261	4.88e-84	Dorsal end proliferation cell	Bpl_scaf_57007-3.16	myoferlin-like isoform X5
115	2.11e-86	0.646394	0.791	0.429	2.86e-82	Dorsal end proliferation cell	Bpl_scaf_33028-1.7	ezrin radixin moesin
116	6.98e-85	0.617112	0.783	0.433	9.46e-81	Dorsal end proliferation cell	Bpl_scaf_5499-2.14	unconventional myosin-VI-like
117	9.89e-84	0.414105	0.413	0.15	1.34e-79	Dorsal end proliferation cell	Bpl_scaf_57618-2.6	putative profilin
118	1.54e-76	0.481715	0.292	0.091	2.09e-72	Dorsal end proliferation cell	Bpl_scaf_28550-0.10	---NA---
119	2.65e-76	0.949561	0.356	0.131	3.6e-72	Dorsal end proliferation cell	Bpl_scaf_38615-0.16	---NA---
120	4.94e-73	0.446434	0.503	0.212	6.69e-69	Dorsal end proliferation cell	Bpl_scaf_21345-4.4	myosin-VIIa-like isoform X2
121	5.86e-72	0.654143	0.889	0.618	7.95e-68	Dorsal end proliferation cell	Bpl_scaf_25973-3.4	---NA---
122	6.77e-72	0.446984	0.355	0.131	9.17e-68	Dorsal end proliferation cell	Bpl_scaf_37490-8.8	plastin-3 isoform X1
123	2.06e-71	0.62263	0.915	0.657	2.79e-67	Dorsal end proliferation cell	Bpl_scaf_33270-1.25	myosin heavy chain, non-muscle isoform X11
124	2.77e-71	0.422167	0.514	0.22	3.75e-67	Dorsal end proliferation cell	Bpl_scaf_30366-7.9	SH3 domain-binding 2-like
125	2.32e-70	0.447646	0.573	0.263	3.15e-66	Dorsal end proliferation cell	Bpl_scaf_48489-0.7	NAD-dependent lipoamidase sirtuin-4, mitochondrial
126	6.53e-69	0.450165	0.521	0.231	8.85e-65	Dorsal end proliferation cell	Bpl_scaf_3829-4.21	Serine threonine- kinase 36
127	7.32e-69	0.550957	0.772	0.44	9.93e-65	Dorsal end proliferation cell	Bpl_scaf_24225-0.12	caspase-7-like isoform X1
128	1.66e-68	0.533584	0.725	0.394	2.25e-64	Dorsal end proliferation cell	Bpl_scaf_48232-5.10	epidermal growth factor receptor kinase substrate 8-like isoform X1
129	7.18e-68	0.418764	0.644	0.315	9.73e-64	Dorsal end proliferation cell	Bpl_scaf_16621-5.15	myb X
130	6.2e-66	0.431189	0.705	0.363	8.4e-62	Dorsal end proliferation cell	Bpl_scaf_62525-10.11	SH3 domain-containing guanine exchange factor
131	5.45e-65	0.433385	0.522	0.235	7.39e-61	Dorsal end proliferation cell	Bpl_scaf_43993-1.24	dynamin-1-like isoform X1
132	1.18e-63	0.600119	0.825	0.527	1.6e-59	Dorsal end proliferation cell	Bpl_scaf_1894-1.45	E3 ubiquitin- ligase RNF213-like
133	3.42e-61	0.457095	0.587	0.287	4.64e-57	Dorsal end proliferation cell	Bpl_scaf_33543-0.10	src kinase-associated phospho 1-like
134	1.19e-60	0.651223	0.829	0.531	1.61e-56	Dorsal end proliferation cell	Bpl_scaf_60908-4.14	mitogen-activated kinase kinase kinase 14-like
135	1.61e-60	0.457168	0.362	0.144	2.19e-56	Dorsal end proliferation cell	Bpl_scaf_22753-4.10	nuclear factor of activated T-cells 5-like
136	2.01e-60	0.559494	0.675	0.36	2.72e-56	Dorsal end proliferation cell	Bpl_scaf_1-0.2	heat shock 70 kDa 12A-like
137	4.73e-54	0.41962	0.68	0.371	6.42e-50	Dorsal end proliferation cell	Bpl_scaf_38089-2.12	unconventional myosin-XV-like isoform X1
138	2.34e-53	0.486539	0.954	0.791	3.17e-49	Dorsal end proliferation cell	Bpl_scaf_57006-3.25	Band 3
139	3.44e-53	0.425069	0.61	0.319	4.66e-49	Dorsal end proliferation cell	Bpl_scaf_34414-0.3	THY domain-containing -1, partial
140	6.89e-51	0.599402	0.902	0.691	9.34e-47	Dorsal end proliferation cell	Bpl_scaf_15294-6.19	spectrin beta chain, non-erythrocytic 5-like isoform X2
141	6.1e-48	0.446086	0.497	0.256	8.26e-44	Dorsal end proliferation cell	Bpl_scaf_52001-2.8	Rho GDP-dissociation inhibitor 1
142	1.49e-43	0.405713	0.758	0.481	2.02e-39	Dorsal end proliferation cell	Bpl_scaf_56339-11.18	serine threonine- kinase WNK1-like isoform X5
143	2.2e-36	0.966042	0.615	0.411	2.98e-32	Dorsal end proliferation cell	Bpl_scaf_55952-0.12	---NA---
144	0	1.45157	0.903	0.647	0	Ventral end proliferation cell	Bpl_scaf_16646-2.15	nucleolin-like isoform X2
145	0	1.21183	0.34	0.096	0	Ventral end proliferation cell	Bpl_scaf_37615-0.12	cell growth-regulating nucleolar -like
146	0	0.992338	0.578	0.413	0	Ventral end proliferation cell	Bpl_scaf_38338-12.22	---NA---
147	0	0.949047	0.807	0.673	0	Ventral end proliferation cell	Bpl_scaf_30175-7.5	Y-Box factor
148	0	0.893618	0.396	0.196	0	Ventral end proliferation cell	Bpl_scaf_5959-7.24	DNA topoisomerase 2-alpha-like isoform X2
149	0	0.871901	0.377	0.167	0	Ventral end proliferation cell	Bpl_scaf_45844-0.9	DEK, partial
150	0	0.871588	0.809	0.612	0	Ventral end proliferation cell	Bpl_scaf_58896-4.11	chromodomain-helicase-DNA-binding 4-like isoform X3
151	0	0.770295	0.851	0.747	0	Ventral end proliferation cell	Bpl_scaf_56354-8.14	40S ribosomal S26
152	0	0.767596	0.653	0.441	0	Ventral end proliferation cell	Bpl_scaf_24012-4.8	serine arginine repetitive matrix 1-like isoform X1
153	0	0.742958	0.703	0.514	0	Ventral end proliferation cell	Bpl_scaf_38266-3.33	60S ribosomal L3
154	0	0.727201	0.434	0.202	0	Ventral end proliferation cell	Bpl_scaf_30366-1.6	nucleolar 56
155	0	0.714012	0.907	0.827	0	Ventral end proliferation cell	Bpl_scaf_2519-1.14	40S ribosomal S12-like
156	0	0.708549	0.775	0.655	0	Ventral end proliferation cell	Bpl_scaf_3471-3.11	60S ribosomal L13-like
157	0	0.698548	0.417	0.231	0	Ventral end proliferation cell	Bpl_scaf_26572-2.21	histone-binding N1 N2-like isoform X2
158	0	0.68568	0.84	0.715	0	Ventral end proliferation cell	Bpl_scaf_46488-6.34	ribosomal S25
159	0	0.671687	0.614	0.455	0	Ventral end proliferation cell	Bpl_scaf_64706-0.15	heterogeneous nuclear ribonucleo U 1
160	0	0.660934	0.704	0.543	0	Ventral end proliferation cell	Bpl_scaf_32549-2.1	40S ribosomal S5
161	0	0.646878	0.715	0.581	0	Ventral end proliferation cell	Bpl_scaf_14738-4.9	heterogeneous nuclear ribonucleo Q isoform X3
162	0	0.641082	0.749	0.608	0	Ventral end proliferation cell	Bpl_scaf_7842-4.11	40S ribosomal S2
163	0	0.596452	0.704	0.568	0	Ventral end proliferation cell	Bpl_scaf_53568-3.4	60S ribosomal L23
164	0	0.595806	0.719	0.595	0	Ventral end proliferation cell	Bpl_scaf_54665-10.11	60S ribosomal L18
165	0	0.595205	0.595	0.435	0	Ventral end proliferation cell	Bpl_scaf_15478-2.4	60S acidic ribosomal P0
166	0	0.585559	0.816	0.728	0	Ventral end proliferation cell	Bpl_scaf_56862-1.23	ribosomal L32
167	0	0.577428	0.757	0.639	0	Ventral end proliferation cell	Bpl_scaf_51690-1.23	40S ribosomal S4-like
168	0	0.560721	0.35	0.191	0	Ventral end proliferation cell	Bpl_scaf_17533-5.54	histone
169	0	0.545013	0.299	0.126	0	Ventral end proliferation cell	Bpl_scaf_48337-3.3	H ACA ribonucleo complex subunit 4-like
170	1.03e-302	0.554611	0.54	0.38	1.4e-298	Ventral end proliferation cell	Bpl_scaf_21636-3.22	60S ribosomal L30
171	3.5e-302	0.560189	0.856	0.784	4.75e-298	Ventral end proliferation cell	Bpl_scaf_21636-2.6	60S acidic ribosomal P1
172	3.58e-302	0.449806	0.294	0.149	4.85e-298	Ventral end proliferation cell	Bpl_scaf_1371-5.5	heterogeneous nuclear ribonucleo A1-like isoform X1
173	4.92e-301	0.619375	0.548	0.382	6.68e-297	Ventral end proliferation cell	Bpl_scaf_38767-1.9	---NA---
174	1.52e-298	0.564359	0.718	0.595	2.06e-294	Ventral end proliferation cell	Bpl_scaf_44032-0.1	60S ribosomal L13A
175	5.1e-287	0.606874	0.598	0.455	6.91e-283	Ventral end proliferation cell	Bpl_scaf_50950-1.7	40S ribosomal SA
176	7.23e-280	0.59761	0.622	0.462	9.8e-276	Ventral end proliferation cell	Bpl_scaf_4833-2.22	apoptotic chromatin condensation inducer in the nucleus-like
177	1.32e-279	0.555184	0.646	0.512	1.79e-275	Ventral end proliferation cell	Bpl_scaf_53185-11.12	ribosomal L28
178	5.91e-275	0.559971	0.637	0.504	8e-271	Ventral end proliferation cell	Bpl_scaf_13042-1.41	ribosomal L11
179	4.1e-273	0.462689	0.919	0.862	5.56e-269	Ventral end proliferation cell	Bpl_scaf_49180-1.5	myotubularin-related 13-like isoform X4
180	2e-266	0.468302	0.302	0.161	2.72e-262	Ventral end proliferation cell	Bpl_scaf_33727-0.15	poly(ADP-ribose) polymerase pme-5-like
181	2.22e-265	0.571621	0.679	0.562	3.01e-261	Ventral end proliferation cell	Bpl_scaf_54280-0.16	40S ribosomal S3a-like
182	7.99e-263	0.536851	0.687	0.566	1.08e-258	Ventral end proliferation cell	Bpl_scaf_15281-0.21	60S ribosomal L9
183	3.6e-261	0.564822	0.723	0.621	4.88e-257	Ventral end proliferation cell	Bpl_scaf_17081-2.11	ribosomal L39, partial
184	4.45e-261	0.554488	0.665	0.538	6.03e-257	Ventral end proliferation cell	Bpl_scaf_30366-9.12	40S ribosomal S15
185	8.09e-258	0.521312	0.787	0.689	1.1e-253	Ventral end proliferation cell	Bpl_scaf_11851-1.32	60S ribosomal L7a-like
186	9.83e-258	0.480925	0.317	0.177	1.33e-253	Ventral end proliferation cell	Bpl_scaf_13236-7.5	nucleolar and coiled-body phospho 1-like
187	2.13e-255	0.574872	0.32	0.18	2.88e-251	Ventral end proliferation cell	Bpl_scaf_18613-15.5	solute carrier family 28 member 3-like
188	3.68e-251	0.521917	0.775	0.68	4.99e-247	Ventral end proliferation cell	Bpl_scaf_63854-9.11	60S ribosomal L8
189	1.11e-250	0.483488	0.387	0.24	1.5e-246	Ventral end proliferation cell	Bpl_scaf_48262-7.15	myelin expression factor 2-like isoform X2
190	2.34e-242	0.480213	0.77	0.679	3.18e-238	Ventral end proliferation cell	Bpl_scaf_60144-0.6	40S ribosomal S27-like
191	3.7e-239	0.547115	0.723	0.62	5.02e-235	Ventral end proliferation cell	Bpl_scaf_10588-4.10	60S ribosomal L4
192	1.83e-238	0.506627	0.615	0.49	2.48e-234	Ventral end proliferation cell	Bpl_scaf_47430-3.10	ribosomal L7
193	2.07e-234	1.11209	0.423	0.281	2.8e-230	Ventral end proliferation cell	Bpl_scaf_45750-0.6	gamma-tubulin complex component 3 homolog
194	6.92e-229	0.574698	0.443	0.295	9.38e-225	Ventral end proliferation cell	Bpl_scaf_57259-5.3	cytoplasmic intermediate filament A
195	5.88e-222	0.52447	0.437	0.293	7.97e-218	Ventral end proliferation cell	Bpl_scaf_52001-4.4	luc7 3
196	9.65e-219	0.505887	0.674	0.566	1.31e-214	Ventral end proliferation cell	Bpl_scaf_34444-0.30	40S ribosomal S6
197	6.81e-213	0.457032	0.364	0.23	9.23e-209	Ventral end proliferation cell	Bpl_scaf_7664-1.12	neurofilament heavy polypeptide-like isoform X1
198	7.49e-210	0.525556	0.641	0.533	1.02e-205	Ventral end proliferation cell	Bpl_scaf_2201-13.26	40S ribosomal S23
199	3.03e-207	0.416108	0.285	0.163	4.1e-203	Ventral end proliferation cell	Bpl_scaf_26352-0.1	pescadillo homolog
200	2.14e-202	0.469074	0.461	0.328	2.89e-198	Ventral end proliferation cell	Bpl_scaf_10139-3.23	plasminogen activator inhibitor 1 RNA-binding -like isoform X1
201	1.62e-198	0.500623	0.625	0.513	2.19e-194	Ventral end proliferation cell	Bpl_scaf_30260-2.32	ribosomal L12
202	5.51e-195	0.461859	0.411	0.278	7.47e-191	Ventral end proliferation cell	Bpl_scaf_59469-1.36	helicase domino-like isoform X1
203	8.24e-195	0.457204	0.543	0.421	1.12e-190	Ventral end proliferation cell	Bpl_scaf_31501-19.22	60S ribosomal L10a-like
204	9.45e-191	0.48258	0.503	0.369	1.28e-186	Ventral end proliferation cell	Bpl_scaf_53568-2.6	peptidyl-prolyl cis-trans isomerase G-like
205	4.03e-187	0.478491	0.589	0.479	5.46e-183	Ventral end proliferation cell	Bpl_scaf_5538-5.4	ribosomal l17
206	2e-186	0.452778	0.521	0.399	2.71e-182	Ventral end proliferation cell	Bpl_scaf_59648-12.44	60S ribosomal L18a
207	4.21e-186	0.467662	0.854	0.792	5.71e-182	Ventral end proliferation cell	Bpl_scaf_43962-2.9	elongation factor 1 alpha
208	1.28e-181	0.464011	0.593	0.48	1.74e-177	Ventral end proliferation cell	Bpl_scaf_61662-4.14	60S ribosomal L15
209	4.29e-173	0.46318	0.553	0.444	5.81e-169	Ventral end proliferation cell	Bpl_scaf_51682-0.3	40S ribosomal S9
210	1.28e-171	0.465821	0.571	0.47	1.74e-167	Ventral end proliferation cell	Bpl_scaf_41044-1.15	heterogeneous nuclear ribonucleo D-like isoform X2
211	3.18e-166	0.411782	0.503	0.384	4.32e-162	Ventral end proliferation cell	Bpl_scaf_63360-21.23	60S ribosomal L22
212	5.49e-166	0.448266	0.592	0.479	7.45e-162	Ventral end proliferation cell	Bpl_scaf_63617-2.38	scaffold attachment factor B2-like isoform X1
213	1.54e-164	0.446584	0.708	0.629	2.09e-160	Ventral end proliferation cell	Bpl_scaf_51173-0.6	60S ribosomal L36-like
214	3.39e-154	0.442602	0.761	0.692	4.6e-150	Ventral end proliferation cell	Bpl_scaf_59681-3.28	60S ribosomal L19
215	5.07e-142	0.429207	0.563	0.468	6.88e-138	Ventral end proliferation cell	Bpl_scaf_54412-8.12	40S ribosomal S19-like
216	3.24e-139	0.442332	0.85	0.782	4.39e-135	Ventral end proliferation cell	Bpl_scaf_57006-3.25	Band 3
217	9.36e-130	0.41201	0.729	0.656	1.27e-125	Ventral end proliferation cell	Bpl_scaf_33635-4.6	Histone-lysine N-methyltransferase SETD2
218	1.12e-119	0.410465	0.656	0.589	1.52e-115	Ventral end proliferation cell	Bpl_scaf_53163-0.1	cellular nucleic acid-binding isoform X1
219	8.76e-55	0.446665	0.301	0.241	1.19e-50	Ventral end proliferation cell	Bpl_scaf_43245-0.1	PREDICTED: uncharacterized protein LOC105321680 isoform X12

## Sheet: Supplementary File 1e
Supplementary File 1e. Identified cell markers of the Bacteriocyte.
	p_val	avg_log2FC	pct.1	pct.2	p_val_adj	cluster	gene	Description
1	0	4.14616	0.893	0.784	0	Bacteriocytes	Bpl_scaf_6901-7.5	Chitin synthase 1
2	0	3.02189	0.83	0.308	0	Bacteriocytes	Bpl_scaf_43856-2.10	---NA---
3	0	2.79203	0.668	0.09	0	Bacteriocytes	Bpl_scaf_8181-0.3	autocrine proliferation repressor A-like
4	0	2.79068	0.436	0.113	0	Bacteriocytes	Bpl_scaf_32311-1.19	solute carrier family 23 member 1-like
5	0	2.26863	0.296	0.085	0	Bacteriocytes	Bpl_scaf_63676-0.3	receptor-type tyrosine- phosphatase beta-like
6	0	2.11443	0.588	0.104	0	Bacteriocytes	Bpl_scaf_35486-0.24	plexin domain-containing 2-like
7	0	1.8897	0.501	0.21	0	Bacteriocytes	Bpl_scaf_40880-0.16	serine threonine- phosphatase 6 regulatory ankyrin repeat subunit B-like isoform X1
8	0	1.81456	0.792	0.259	0	Bacteriocytes	Bpl_scaf_59360-0.26	---NA---
9	0	1.65106	0.493	0.206	0	Bacteriocytes	Bpl_scaf_59940-0.6	---NA---
10	0	1.55285	0.456	0.046	0	Bacteriocytes	Bpl_scaf_6090-10.23	---NA---
11	0	1.43354	0.482	0.142	0	Bacteriocytes	Bpl_scaf_36159-5.5	b(0,+)-type amino acid transporter 1-like
12	0	1.42218	0.376	0.202	0	Bacteriocytes	Bpl_scaf_52188-1.15	TMPRSS15 [Mytilus coruscus]
13	0	1.36987	0.503	0.132	0	Bacteriocytes	Bpl_scaf_59648-4.5	lysosomal alpha-glucosidase-like
14	0	1.35953	0.503	0.125	0	Bacteriocytes	Bpl_scaf_19175-0.0	---NA---
15	0	1.30747	0.436	0.053	0	Bacteriocytes	Bpl_scaf_14503-1.28	sodium potassium calcium exchanger 3-like
16	0	1.28414	0.375	0.042	0	Bacteriocytes	Bpl_scaf_63447-0.12	solute carrier family 40 member 1-like
17	0	1.28169	0.408	0.067	0	Bacteriocytes	Bpl_scaf_54816-0.3	Rabenosyn-5
18	0	1.25974	0.364	0.181	0	Bacteriocytes	Bpl_scaf_190-0.4	MAM and LDL-receptor class A domain-containing 2-like
19	0	1.25719	0.614	0.274	0	Bacteriocytes	Bpl_scaf_64005-13.12	prolow-density lipo receptor-related 1
20	0	1.22809	0.355	0.178	0	Bacteriocytes	Bpl_scaf_15410-0.9	MAM and LDL-receptor class A domain-containing 2-like
21	0	1.19633	0.397	0.065	0	Bacteriocytes	Bpl_scaf_30503-0.4	autocrine proliferation repressor A-like
22	0	1.07364	0.474	0.191	0	Bacteriocytes	Bpl_scaf_46838-6.40	cathepsin L1-like isoform X1
23	0	1.06795	0.917	0.723	0	Bacteriocytes	Bpl_scaf_14076-3.9	G patch domain-containing 8 isoform X3
24	0	1.05635	0.474	0.212	0	Bacteriocytes	Bpl_scaf_14490-0.6	low-density lipo receptor-related 4-like
25	0	1.03416	0.947	0.802	0	Bacteriocytes	Bpl_scaf_42979-0.15	RNA-binding 25-like
26	0	0.992751	0.323	0.16	0	Bacteriocytes	Bpl_scaf_41403-0.30	---NA---
27	0	0.941199	0.469	0.198	0	Bacteriocytes	Bpl_scaf_54265-1.13	Kinesin KIF16B
28	0	0.922622	0.339	0.092	0	Bacteriocytes	Bpl_scaf_44428-5.3	zinc transporter ZIP14-like
29	0	0.916442	0.696	0.525	0	Bacteriocytes	Bpl_scaf_6172-0.3	baculoviral IAP repeat-containing 3-like
30	0	0.872852	0.61	0.307	0	Bacteriocytes	Bpl_scaf_19571-0.5	deleted in malignant brain tumors 1 -like
31	0	0.853799	0.398	0.203	0	Bacteriocytes	Bpl_scaf_58948-1.5	anoctamin-8-like isoform X1
32	0	0.834554	0.336	0.133	0	Bacteriocytes	Bpl_scaf_27158-3.8	perilipin-2-like isoform X1
33	0	0.829444	0.484	0.251	0	Bacteriocytes	Bpl_scaf_61711-5.11	quaking-B-like isoform X2
34	0	0.818693	0.315	0.077	0	Bacteriocytes	Bpl_scaf_44604-3.7	solute carrier family 12 member 3-like isoform X1
35	0	0.81089	0.482	0.287	0	Bacteriocytes	Bpl_scaf_24370-0.5	globin-like isoform X3
36	0	0.809226	0.848	0.706	0	Bacteriocytes	Bpl_scaf_15404-0.0	---NA---
37	0	0.788586	0.317	0.127	0	Bacteriocytes	Bpl_scaf_15282-3.10	phosphoethanolamine N-methyltransferase 3-like isoform X3
38	0	0.749109	0.283	0.102	0	Bacteriocytes	Bpl_scaf_28862-1.5	long-chain-fatty-acid-- ligase ACSBG2-like isoform X1
39	0	0.730168	0.318	0.115	0	Bacteriocytes	Bpl_scaf_51448-0.9	early endosome antigen 1-like
40	0	0.70285	0.413	0.225	0	Bacteriocytes	Bpl_scaf_4947-2.17	girdin-like isoform X4
41	0	0.701517	0.407	0.212	0	Bacteriocytes	Bpl_scaf_64229-1.6	ecotropic viral integration site 5 ortholog-like isoform X1
42	0	0.687497	0.323	0.125	0	Bacteriocytes	Bpl_scaf_29437-0.4	deleted in malignant brain tumors 1 protein, partial [Mytilus galloprovincialis]
43	0	0.670478	0.402	0.206	0	Bacteriocytes	Bpl_scaf_43993-1.24	dynamin-1-like isoform X1
44	0	0.664959	0.312	0.124	0	Bacteriocytes	Bpl_scaf_49546-0.11	minor histocompatibility HA-1-like isoform X7
45	0	0.656552	0.311	0.12	0	Bacteriocytes	Bpl_scaf_4565-2.4	---NA---
46	0	0.640353	0.318	0.161	0	Bacteriocytes	Bpl_scaf_19387-3.11	microtubule-associated futsch-like isoform X1
47	0	0.630141	0.323	0.151	0	Bacteriocytes	Bpl_scaf_55250-5.11	acetyl- carboxylase 2
48	0	0.629391	0.349	0.178	0	Bacteriocytes	Bpl_scaf_61711-5.12	cathepsin L1-like
49	0	0.600698	0.281	0.138	0	Bacteriocytes	Bpl_scaf_35916-0.6	fatty acid desaturase 1-like isoform X1
50	0	0.599638	0.544	0.381	0	Bacteriocytes	Bpl_scaf_9451-4.15	scribble homolog isoform X8
51	0	0.592554	0.278	0.111	0	Bacteriocytes	Bpl_scaf_9153-4.14	dnaJ homolog subfamily C member 13-like isoform X2
52	0	0.587121	0.268	0.105	0	Bacteriocytes	Bpl_scaf_41172-3.3	huntingtin-interacting 1-like isoform X2
53	0	0.57758	0.26	0.089	0	Bacteriocytes	Bpl_scaf_52809-1.6	lysosomal-trafficking regulator-like isoform X1
54	0	0.574351	0.277	0.116	0	Bacteriocytes	Bpl_scaf_23346-2.5	Selenium-binding 1, partial
55	0	0.571338	0.282	0.134	0	Bacteriocytes	Bpl_scaf_34315-4.10	Choline dehydrogenase, mitochondrial
56	0	0.568962	0.25	0.096	0	Bacteriocytes	Bpl_scaf_50392-1.14	globin-like isoform X3
57	1.56e-307	0.506009	0.288	0.147	2.11e-303	Bacteriocytes	Bpl_scaf_21960-3.17	mediator of RNA polymerase II transcription subunit 12
58	6.37e-305	0.574994	0.431	0.272	8.63e-301	Bacteriocytes	Bpl_scaf_31501-15.9	SON-like isoform X1
59	5.57e-299	0.502407	0.781	0.653	7.56e-295	Bacteriocytes	Bpl_scaf_47525-1.6	---NA---
60	2.99e-298	0.594329	0.454	0.296	4.05e-294	Bacteriocytes	Bpl_scaf_59490-0.7	neurobeachin-like isoform X4
61	7.49e-295	0.505816	0.313	0.168	1.01e-290	Bacteriocytes	Bpl_scaf_59459-1.14	dedicator of cytokinesis 9-like isoform X10
62	8.69e-294	0.513181	0.298	0.158	1.18e-289	Bacteriocytes	Bpl_scaf_16961-15.16	ectopic P granules 5 homolog
63	1.4e-283	0.506223	0.268	0.136	1.9e-279	Bacteriocytes	Bpl_scaf_33726-5.7	FYVE and coiled-coil domain-containing 1-like
64	2.28e-279	0.583251	0.592	0.457	3.09e-275	Bacteriocytes	Bpl_scaf_34764-3.19	nucleolin-like isoform X1
65	9.76e-271	0.569017	0.356	0.214	1.32e-266	Bacteriocytes	Bpl_scaf_36689-8.21	hypothetical protein LOTGIDRAFT_189496
66	7.16e-265	0.550584	0.302	0.166	9.7e-261	Bacteriocytes	Bpl_scaf_26757-3.8	probable serine-O-acetyltransferase cys2
67	1.41e-259	0.558838	0.643	0.512	1.92e-255	Bacteriocytes	Bpl_scaf_60908-4.14	mitogen-activated kinase kinase kinase 14-like
68	3.47e-255	0.464081	0.28	0.151	4.7e-251	Bacteriocytes	Bpl_scaf_51501-2.9	extended synaptotagmin 2 variant
69	8.21e-250	0.56848	0.312	0.18	1.11e-245	Bacteriocytes	Bpl_scaf_21173-5.3	kidney mitochondrial carrier 1-like
70	1.65e-244	0.531527	0.474	0.335	2.24e-240	Bacteriocytes	Bpl_scaf_50876-9.2	vav-like isoform X7
71	3.9e-242	0.876989	0.343	0.21	5.29e-238	Bacteriocytes	Bpl_scaf_55333-2.10	1-phosphatidylinositol 4,5-bisphosphate phosphodiesterase beta-4-like, partial
72	4.37e-241	0.522586	0.467	0.33	5.92e-237	Bacteriocytes	Bpl_scaf_42954-5.5	drebrin B isoform X2
73	7.31e-240	0.485762	0.328	0.197	9.91e-236	Bacteriocytes	Bpl_scaf_46056-0.5	---NA---
74	9.63e-227	0.507148	0.402	0.27	1.31e-222	Bacteriocytes	Bpl_scaf_14932-3.17	FH1 FH2 domain-containing 3-like isoform X10
75	3.44e-225	0.516428	0.321	0.192	4.66e-221	Bacteriocytes	Bpl_scaf_53516-0.11	WD repeat and FYVE domain-containing 2-like
76	3.94e-221	0.431208	0.277	0.157	5.34e-217	Bacteriocytes	Bpl_scaf_30147-5.10	myosin-VIIa-like isoform X5
77	3.94e-219	0.466382	0.294	0.167	5.34e-215	Bacteriocytes	Bpl_scaf_16489-0.6	neural-cadherin 2
78	1.42e-212	0.487545	0.515	0.39	1.92e-208	Bacteriocytes	Bpl_scaf_14550-9.23	leucine-rich repeat and calponin homology domain-containing 2-like isoform X2
79	6.86e-206	0.429897	0.65	0.514	9.3e-202	Bacteriocytes	Bpl_scaf_61993-0.4	sushi, von Willebrand factor type A, EGF and pentraxin domain-containing 1 isoform X1
80	3.47e-192	0.415222	0.269	0.158	4.7e-188	Bacteriocytes	Bpl_scaf_63096-3.17	phosphoenolpyruvate carboxykinase, cytosolic [GTP]-like
81	1.58e-190	0.506146	0.383	0.255	2.15e-186	Bacteriocytes	Bpl_scaf_44427-3.9	DNA repair REV1 isoform X1
82	1.03e-188	0.445878	0.744	0.653	1.39e-184	Bacteriocytes	Bpl_scaf_33635-4.6	Histone-lysine N-methyltransferase SETD2
83	5.23e-180	0.426573	0.286	0.175	7.1e-176	Bacteriocytes	Bpl_scaf_14819-0.11	kinesin , (fragment), partial
84	1.06e-172	0.427166	0.591	0.485	1.44e-168	Bacteriocytes	Bpl_scaf_36436-0.10	cell division cycle and apoptosis regulator 1 isoform X1
85	2.14e-166	0.416816	0.311	0.203	2.9e-162	Bacteriocytes	Bpl_scaf_4784-1.40	kinesin light chain-like isoform X8
86	4.74e-162	0.495406	0.266	0.16	6.42e-158	Bacteriocytes	Bpl_scaf_7842-1.11	H(+) Cl(-) exchange transporter 7-like
87	3.49e-157	0.476534	0.34	0.231	4.73e-153	Bacteriocytes	Bpl_scaf_2733-0.6	sushi, von Willebrand factor type A, EGF and pentraxin domain-containing 1-like
88	4.6e-156	0.641684	0.511	0.394	6.23e-152	Bacteriocytes	Bpl_scaf_55952-0.12	---NA---
89	2.36e-149	0.576418	0.393	0.286	3.2e-145	Bacteriocytes	Bpl_scaf_5295-1.6	poly [ADP-ribose] polymerase 14-like
90	4.07e-102	0.424788	0.564	0.481	5.51e-98	Bacteriocytes	Bpl_scaf_32300-1.15	baculoviral IAP repeat-containing 7-B-like
91	5.77e-34	0.550228	0.472	0.438	7.83e-30	Bacteriocytes	Bpl_scaf_24225-0.12	caspase-7-like isoform X1
92	2.4e-32	0.627846	0.418	0.386	3.26e-28	Bacteriocytes	Bpl_scaf_19166-1.14	PREDICTED: uncharacterized protein LOC105328034

## Sheet: Supplementary File 1f
Supplementary File 1f. Cell cluster specific Differentially expressed genes among the three deep-sea in situ treatments, the Inter lamina cell.
	p_val	avg_log2FC	pct.1	pct.2	p_val_adj	cluster	gene	Prot_Length	GO_ID	KEGG_ko	Description
1	0	2.31232	0.423	0.045	0	Fanmao	Bpl_scaf_63703-4.15	667	-	-	Inhibitor of apoptosis
2	0	1.95154	0.586	0.031	0	Fanmao	Bpl_scaf_43051-0.3	233	-	-	PREDICTED: uncharacterized protein LOC105335571
3	0	1.85247	0.715	0.264	0	Fanmao	Bpl_scaf_57259-5.3	629	-	-	cytoplasmic intermediate filament A
4	0	1.81711	0.595	0.078	0	Fanmao	Bpl_scaf_35290-1.7	352	-	-	flocculation FLO10-like
5	0	1.68044	0.547	0.022	0	Fanmao	Bpl_scaf_36688-0.22	446	-	-	H5p, partial
6	0	1.64187	0.598	0.135	0	Fanmao	Bpl_scaf_61985-5.10	2593	-	K04437	filamin -1
7	0	1.6244	0.802	0.51	0	Fanmao	Bpl_scaf_63703-4.35	72	GO:0046872	-	MT22_MYTED ame: Full=Metallothionein 20-II Short=MT-20-II
8	0	1.62186	0.558	0.085	0	Fanmao	Bpl_scaf_14002-1.10	209	-	-	baculoviral IAP repeat-containing 7-A-like
9	0	1.61036	0.548	0.073	0	Fanmao	Bpl_scaf_31664-2.6	131	-	-	---NA---
10	0	1.59288	0.56	0.09	0	Fanmao	Bpl_scaf_54651-5.17	193	GO:0005515	-	PREDICTED: myophilin-like
11	0	1.19076	0.413	0.058	0	Fanmao	Bpl_scaf_46524-0.9	608	-	-	zinc metallo ase nas-15-like
12	0	0.857144	0.348	0.054	0	Fanmao	Bpl_scaf_6384-5.17	693	-	-	---NA---
13	0	0.798239	0.307	0.009	0	Fanmao	Bpl_scaf_17051-13.8	206	-	K04097	glutathione S-transferase sigma 3
14	3.82269e-267	0.617225	0.254	0.027	5.18127e-263	Fanmao	Bpl_scaf_22947-2.14	288	GO:0003824,GO:0005739,GO:0006464,GO:0043167,GO:0044710,GO:0044763,GO:0050794,GO:0080090	K11414	NAD-dependent deacetylase sirtuin-4-like
15	6.02038e-223	1.06363	0.774	0.611	8.16003e-219	Fanmao	Bpl_scaf_48581-0.7	224	-	-	PREDICTED: uncharacterized protein LOC105328788 isoform X2
16	1.57533e-222	0.880755	0.835	0.739	2.13521e-218	Fanmao	Bpl_scaf_13236-2.10	263	GO:0004322,GO:0005623,GO:0006826,GO:0006879,GO:0008199,GO:0055114	K00522	Soma ferritin
17	5.78303e-200	2.03292	0.422	0.16	7.83832e-196	Fanmao	Bpl_scaf_268-5.8	509	-	-	serine threonine- phosphatase 6 regulatory ankyrin repeat subunit B-like
18	1.38151e-196	0.762821	0.344	0.104	1.8725e-192	Fanmao	Bpl_scaf_22631-2.16	483	-	K07763	Matrix metallo ase-19
19	1.8362e-190	1.5677	0.577	0.338	2.48879e-186	Fanmao	Bpl_scaf_59360-0.26	105	-	-	---NA---
20	7.99747e-186	0.944334	0.687	0.514	1.08398e-181	Fanmao	Bpl_scaf_22242-2.44	432	GO:0003924,GO:0005200,GO:0005525,GO:0005737,GO:0005874,GO:0007017,GO:0008152,GO:0021634,GO:0043066,GO:0051258	K07374	tubulin alpha-1A chain-like, partial
21	1.66385e-185	0.580659	0.257	0.055	2.25518e-181	Fanmao	Bpl_scaf_9316-4.10	481	GO:0000166,GO:0004812,GO:0006418	K01876	aspartate--tRNA ligase, cytoplasmic-like
22	1.40444e-173	1.79568	0.347	0.121	1.90358e-169	Fanmao	Bpl_scaf_20064-1.14	1326	-	K19511	peroxidasin-like isoform X1
23	4.95508e-165	0.909842	0.582	0.369	6.71612e-161	Fanmao	Bpl_scaf_22089-0.17	392	GO:0016021	K16336	syndecan-like isoform X1
24	5.08649e-162	0.573037	0.266	0.07	6.89423e-158	Fanmao	Bpl_scaf_11692-0.3	372	-	-	hypothetical protein CGI_10028865
25	2.3538e-161	0.879907	0.62	0.42	3.19034e-157	Fanmao	Bpl_scaf_24592-4.10	500	GO:0003743,GO:0004386,GO:0005524,GO:0006413	K03257	eukaryotic initiation factor 4A-I-like
26	2.44885e-149	0.72008	0.362	0.145	3.31917e-145	Fanmao	Bpl_scaf_61711-1.12	442	-	-	inhibitor of apoptosis
27	6.86337e-118	0.769617	0.387	0.188	9.30261e-114	Fanmao	Bpl_scaf_43245-0.1	2198	-	-	PREDICTED: uncharacterized protein LOC105321680 isoform X12
28	2.84297e-109	0.6796	0.39	0.197	3.85336e-105	Fanmao	Bpl_scaf_64398-0.3	115	-	-	---NA---
29	8.76634e-104	0.659681	0.512	0.328	1.18819e-99	Fanmao	Bpl_scaf_14002-3.3	366	GO:0004054,GO:0005524,GO:0016310	K00933	arginine kinase
30	4.29299e-93	0.614354	0.336	0.164	5.81872e-89	Fanmao	Bpl_scaf_57424-6.1	370	-	K02222	secreted frizzled-related 5-like
31	1.04632e-89	0.544164	0.34	0.17	1.41818e-85	Fanmao	Bpl_scaf_29375-1.23	184	-	-	---NA---
32	5.92895e-89	0.581982	0.558	0.395	8.03609e-85	Fanmao	Bpl_scaf_48777-1.5	504	GO:0003676,GO:0046872	K09206	Krueppel-like factor 5
33	6.08834e-85	0.710602	0.727	0.636	8.25214e-81	Fanmao	Bpl_scaf_58896-4.11	2052	-	K11643	chromodomain-helicase-DNA-binding 4-like isoform X3
34	1.11483e-79	0.582999	0.737	0.676	1.51104e-75	Fanmao	Bpl_scaf_38266-3.33	402	GO:0003735,GO:0005840,GO:0006412	K02925	60S ribosomal L3
35	1.27057e-72	0.610813	0.336	0.185	1.72212e-68	Fanmao	Bpl_scaf_59648-5.10	1391	-	K10369	Supervillin
36	1.68622e-69	0.411519	0.279	0.138	2.28551e-65	Fanmao	Bpl_scaf_37373-0.6	1218	-	-	kyphoscoliosis peptidase-like isoform X1
37	3.35718e-65	0.557595	0.44	0.292	4.55032e-61	Fanmao	Bpl_scaf_30366-1.6	517	-	K14564	nucleolar 56
38	1.17624e-62	0.53403	0.622	0.515	1.59427e-58	Fanmao	Bpl_scaf_63703-4.30	110	GO:0005758,GO:0006122,GO:0006123,GO:0009055,GO:0020037,GO:0043280,GO:0046872,GO:0070469	K08738	cytochrome c
39	7.24781e-62	0.513636	0.296	0.161	9.82369e-58	Fanmao	Bpl_scaf_2581-2.10	1052	GO:0006355,GO:0007379,GO:0008023,GO:0009952,GO:0070062,GO:0090090,GO:2000096	K15187	AF-9 isoform X2
40	2.31282e-61	0.456327	0.376	0.231	3.13479e-57	Fanmao	Bpl_scaf_56904-8.14	256	-	-	RNA-binding lark-like isoform X1
41	1.14457e-57	0.484883	0.391	0.252	1.55135e-53	Fanmao	Bpl_scaf_64300-3.5	405	GO:0016020,GO:0016740	K13516	lysophospholipid acyltransferase 7-like
42	3.66991e-54	0.409236	0.299	0.169	4.9742e-50	Fanmao	Bpl_scaf_24319-6.21	456	GO:0000166	K06185	ATP-binding cassette sub-family F member 2-like
43	7.07397e-51	0.472933	0.393	0.26	9.58806e-47	Fanmao	Bpl_scaf_8163-0.13	160	-	-	PREDICTED: uncharacterized protein LOC105337979 isoform X1
44	4.55182e-50	0.484033	0.445	0.319	6.16954e-46	Fanmao	Bpl_scaf_52001-2.8	201	-	K12462	Rho GDP-dissociation inhibitor 1
45	4.90486e-47	0.486035	0.722	0.697	6.64805e-43	Fanmao	Bpl_scaf_30366-9.12	150	GO:0003723,GO:0003735,GO:0006412,GO:0015935	K02958	40S ribosomal S15
46	9.6614e-40	0.544074	0.582	0.497	1.30951e-35	Fanmao	Bpl_scaf_1905-1.32	679	-	K11722	bromodomain-containing 3-like isoform X1
47	1.54257e-37	0.477736	0.506	0.413	2.0908e-33	Fanmao	Bpl_scaf_5499-2.14	1245	GO:0003774,GO:0003779,GO:0005524,GO:0005654,GO:0007154,GO:0008152,GO:0012505,GO:0016023,GO:0016043,GO:0016459,GO:0030182,GO:0031090,GO:0042995,GO:0044700,GO:0044765,GO:0048839,GO:0050794,GO:0051649,GO:0051716,GO:0071702,GO:0097458	K10358	unconventional myosin-VI-like
48	4.3849e-25	0.546127	0.49	0.419	5.94329e-21	Fanmao	Bpl_scaf_3539-1.26	1005	-	K16806	microtubule-associated futsch-like isoform X17
49	7.79232e-23	0.54656	0.489	0.425	1.05617e-18	Fanmao	Bpl_scaf_7653-2.14	2584	-	-	MLP1-like isoform X4
50	5.70137e-07	0.434489	0.286	0.354	0.00772763	Fanmao	Bpl_scaf_24225-0.12	287	-	K04397	caspase-7-like isoform X1
51	0	3.86204	0.761	0.017	0	Reconstitution	Bpl_scaf_55952-0.12	714	-	-	---NA---
52	0	2.34021	0.773	0.159	0	Reconstitution	Bpl_scaf_43856-2.10	1475	-	-	---NA---
53	0	2.05208	0.786	0.217	0	Reconstitution	Bpl_scaf_33596-7.3	258	-	-	carbonic anhydrase 1-like
54	0	1.80238	0.667	0.183	0	Reconstitution	Bpl_scaf_16935-0.17	266	-	-	A disintegrin and metallo ase with thrombospondin motifs gon-1-like
55	0	1.78057	0.735	0.274	0	Reconstitution	Bpl_scaf_48945-0.2	306	-	-	zinc finger MYM-type 4-like
56	0	1.5767	0.722	0.29	0	Reconstitution	Bpl_scaf_48274-0.3	257	-	K01672	carbonic anhydrase 1-like
57	0	1.4028	0.367	0.063	0	Reconstitution	Bpl_scaf_40880-0.16	482	-	-	serine threonine- phosphatase 6 regulatory ankyrin repeat subunit B-like isoform X1
58	0	1.24554	0.289	0.029	0	Reconstitution	Bpl_scaf_62409-0.16	935	GO:0005488	-	PREDICTED: uncharacterized protein LOC105333786 isoform X2
59	0	1.23818	0.785	0.431	0	Reconstitution	Bpl_scaf_47525-1.6	531	-	-	---NA---
60	0	0.945615	0.391	0.038	0	Reconstitution	Bpl_scaf_15282-3.10	493	GO:0008168,GO:0032259	K05929	phosphoethanolamine N-methyltransferase 3-like isoform X3
61	0	0.84125	0.439	0.111	0	Reconstitution	Bpl_scaf_62441-3.7	198	-	K17725	persulfide dioxygenase ETHE1, mitochondrial-like isoform X1
62	0	0.707358	0.336	0.046	0	Reconstitution	Bpl_scaf_15800-0.5	367	GO:0004648,GO:0005737,GO:0006564,GO:0070062	K00831	Phosphoserine aminotransferase
63	1.00284e-298	0.678248	0.292	0.036	1.35925e-294	Reconstitution	Bpl_scaf_34315-4.10	1177	GO:0016614,GO:0044710	K00108	Choline dehydrogenase, mitochondrial
64	1.25082e-275	0.682912	0.314	0.053	1.69536e-271	Reconstitution	Bpl_scaf_26757-3.8	575	GO:0004414,GO:0005737,GO:0009086	K00641	probable serine-O-acetyltransferase cys2
65	5.15638e-274	1.495	0.871	0.587	6.98896e-270	Reconstitution	Bpl_scaf_6901-7.5	2075	-	K00698	Chitin synthase 1
66	2.84759e-269	0.583459	0.265	0.033	3.85962e-265	Reconstitution	Bpl_scaf_1866-2.25	533	GO:0016616,GO:0044710	K00058	D-3-phosphoglycerate dehydrogenase-like
67	1.06086e-265	0.958763	0.605	0.272	1.4379e-261	Reconstitution	Bpl_scaf_61662-2.9	348	GO:0008270,GO:0016491,GO:0055114	-	geraniol dehydrogenase 1-like isoform X2
68	8.19753e-250	0.581256	0.304	0.056	1.11109e-245	Reconstitution	Bpl_scaf_39615-1.23	123	-	-	hypothetical protein CGI_10005738
69	3.01254e-229	0.822096	0.565	0.257	4.0832e-225	Reconstitution	Bpl_scaf_26757-3.20	360	GO:0004356,GO:0005524,GO:0006542	K01915	Glutamine synthetase
70	8.10913e-225	0.640499	0.29	0.058	1.09911e-220	Reconstitution	Bpl_scaf_724-3.6	101	-	-	---NA---
71	2.50314e-187	0.570811	0.34	0.102	3.39276e-183	Reconstitution	Bpl_scaf_36179-1.3	447	GO:0005743,GO:0070224	K17218	Sulfide:quinone oxidoreductase, mitochondrial
72	2.90267e-185	0.544465	0.323	0.092	3.93428e-181	Reconstitution	Bpl_scaf_60763-2.30	224	-	-	Nidogen-2, partial
73	2.46673e-170	0.738128	0.378	0.137	3.3434e-166	Reconstitution	Bpl_scaf_1-0.2	477	-	-	heat shock 70 kDa 12A-like
74	1.32893e-169	0.918622	0.477	0.209	1.80124e-165	Reconstitution	Bpl_scaf_61993-0.4	291	-	-	sushi, von Willebrand factor type A, EGF and pentraxin domain-containing 1 isoform X1
75	3.60917e-168	0.667993	0.369	0.13	4.89186e-164	Reconstitution	Bpl_scaf_40897-0.6	78	-	-	---NA---
76	2.63139e-161	0.524523	0.313	0.097	3.56658e-157	Reconstitution	Bpl_scaf_58896-13.4	159	-	-	receptor-transporting 4-like isoform X1
77	8.9748e-152	0.616845	0.47	0.223	1.21644e-147	Reconstitution	Bpl_scaf_29450-1.2	237	GO:0003700,GO:0003707,GO:0005496,GO:0005634,GO:0006351,GO:0006355,GO:0008270,GO:0043401,GO:0043565	K08554	steroid hormone receptor ERR2-like isoform X1
78	3.05509e-149	0.549234	0.32	0.109	4.14087e-145	Reconstitution	Bpl_scaf_50392-1.14	170	GO:0005488	-	globin-like isoform X3
79	1.50869e-144	0.476877	0.329	0.114	2.04488e-140	Reconstitution	Bpl_scaf_10487-5.3	483	-	-	deleted in malignant brain tumors 1 -like
80	4.28975e-143	0.771523	0.627	0.4	5.81433e-139	Reconstitution	Bpl_scaf_45124-0.16	411	GO:0004478,GO:0005524,GO:0006556,GO:0006730,GO:0046872	K00789	S-adenosylmethionine synthase isoform type-2-like isoform X1
81	3.5275e-139	0.706994	0.616	0.372	4.78117e-135	Reconstitution	Bpl_scaf_24370-0.5	168	-	-	globin-like isoform X3
82	1.87897e-134	0.44624	0.261	0.079	2.54676e-130	Reconstitution	Bpl_scaf_23346-2.5	484	GO:0005634,GO:0005829,GO:0008430,GO:0015031,GO:0016020	K17285	Selenium-binding 1, partial
83	4.08065e-133	0.503762	0.257	0.076	5.53091e-129	Reconstitution	Bpl_scaf_33543-0.10	386	-	K07984	src kinase-associated phospho 1-like
84	1.38455e-132	0.900794	0.461	0.229	1.87662e-128	Reconstitution	Bpl_scaf_58954-2.7	184	GO:0044765	-	Transient receptor potential cation channel subfamily M member 3
85	2.81542e-126	0.460144	0.253	0.077	3.81601e-122	Reconstitution	Bpl_scaf_21173-5.3	299	GO:0006839,GO:0016021,GO:0031966,GO:0055085	K15106	kidney mitochondrial carrier 1-like
86	1.6391e-125	0.553195	0.343	0.137	2.22164e-121	Reconstitution	Bpl_scaf_41724-1.2	484	-	-	RNA-directed DNA polymerase from transposon BS
87	1.89499e-124	0.598325	0.755	0.546	2.56847e-120	Reconstitution	Bpl_scaf_25973-3.4	88	-	-	---NA---
88	5.55835e-123	0.638283	0.7	0.461	7.53379e-119	Reconstitution	Bpl_scaf_14076-3.9	1146	-	-	G patch domain-containing 8 isoform X3
89	3.92528e-110	0.498042	0.455	0.239	5.32032e-106	Reconstitution	Bpl_scaf_53568-2.6	1117	GO:0000413,GO:0003755,GO:0006457	K09566	peptidyl-prolyl cis-trans isomerase G-like
90	4.78447e-105	0.516436	0.544	0.313	6.48487e-101	Reconstitution	Bpl_scaf_22362-6.9	2026	GO:0035253,GO:0051297	K16469	rootletin-like isoform X7
91	1.44528e-103	0.556201	0.833	0.682	1.95894e-99	Reconstitution	Bpl_scaf_32527-1.23	163	-	-	translationally-controlled tumor
92	4.26295e-102	0.554417	0.744	0.562	5.778e-98	Reconstitution	Bpl_scaf_17778-1.40	146	-	K05765	actin-depolymerizing factor 6
93	9.6656e-102	0.423892	0.273	0.106	1.31008e-97	Reconstitution	Bpl_scaf_35916-0.6	435	GO:0006629,GO:0016021,GO:0016491,GO:0055114	K10226	fatty acid desaturase 1-like isoform X1
94	4.9957e-98	0.428778	0.304	0.13	6.77117e-94	Reconstitution	Bpl_scaf_59648-4.5	967	GO:0008152,GO:0016798	K12316	lysosomal alpha-glucosidase-like
95	5.02992e-94	0.494456	0.506	0.298	6.81755e-90	Reconstitution	Bpl_scaf_58225-3.29	239	-	-	transcriptional activator Pur-beta-B-like isoform X6
96	1.92278e-92	0.558148	0.577	0.359	2.60614e-88	Reconstitution	Bpl_scaf_19372-2.10	2771	-	-	golgin subfamily B member 1-like
97	2.88579e-92	0.442094	0.457	0.257	3.9114e-88	Reconstitution	Bpl_scaf_48489-0.7	295	GO:0043167	-	NAD-dependent lipoamidase sirtuin-4, mitochondrial
98	5.23154e-92	0.469302	0.27	0.109	7.09082e-88	Reconstitution	Bpl_scaf_44427-3.9	1326	GO:0009987,GO:0016740,GO:0050896	K03515	DNA repair REV1 isoform X1
99	1.19179e-88	0.43906	0.401	0.21	1.61536e-84	Reconstitution	Bpl_scaf_16621-2.3	453	-	K15616	eyes absent homolog 1-like isoform X14
100	3.94219e-88	0.509783	0.741	0.563	5.34324e-84	Reconstitution	Bpl_scaf_36595-6.57	376	GO:0000281,GO:0005524,GO:0005884,GO:0005886,GO:0005925,GO:0005938,GO:0007126,GO:0009790,GO:0016887,GO:0030036,GO:0040011,GO:0097433	K05692	actin
101	3.82288e-87	0.568326	0.309	0.141	5.18154e-83	Reconstitution	Bpl_scaf_55333-2.10	1065	GO:0006629,GO:0007165,GO:0008081	K05858	1-phosphatidylinositol 4,5-bisphosphate phosphodiesterase beta-4-like, partial
102	1.03509e-86	0.583873	0.638	0.449	1.40296e-82	Reconstitution	Bpl_scaf_2723-4.12	6596	GO:0003779,GO:0005635	K19326	nesprin-1-like isoform X3
103	3.23641e-86	0.491026	0.803	0.655	4.38663e-82	Reconstitution	Bpl_scaf_54410-1.12	649	GO:0000166,GO:0003723,GO:0005737	K13126	polyadenylate-binding 4-like
104	4.62978e-86	0.486399	0.553	0.344	6.27521e-82	Reconstitution	Bpl_scaf_60908-4.14	1782	GO:0005488,GO:0006464,GO:0016301,GO:0016310,GO:0050794	-	mitogen-activated kinase kinase kinase 14-like
105	2.43098e-85	0.439726	0.279	0.12	3.29495e-81	Reconstitution	Bpl_scaf_36964-11.16	3833	GO:0003777,GO:0005524,GO:0007018,GO:0008152,GO:0030286	-	dynein heavy chain 3, axonemal-like
106	8.37823e-84	0.50319	0.662	0.472	1.13559e-79	Reconstitution	Bpl_scaf_19133-6.3	249	GO:0001664,GO:0003924,GO:0004871,GO:0005525,GO:0007186,GO:0008152,GO:0031683	K04634	guanine nucleotide-binding G(q) subunit alpha
107	1.70186e-82	0.452878	0.512	0.319	2.3067e-78	Reconstitution	Bpl_scaf_44217-4.35	420	GO:0003924,GO:0005200,GO:0005525,GO:0005737,GO:0005874,GO:0007017,GO:0008152,GO:0051258	-	Tubulin alpha-1C chain
108	1.08713e-80	0.42635	0.445	0.26	1.4735e-76	Reconstitution	Bpl_scaf_46270-3.13	1536	-	K03260	eukaryotic translation initiation factor 4 gamma 1-like isoform X3
109	2.68265e-78	0.431471	0.523	0.328	3.63606e-74	Reconstitution	Bpl_scaf_34414-0.3	206	-	-	THY domain-containing -1, partial
110	1.89716e-77	0.48358	0.812	0.681	2.57141e-73	Reconstitution	Bpl_scaf_53163-0.1	187	GO:0005515,GO:0006355,GO:0044238,GO:0044424,GO:0044822,GO:1901362	K09250	cellular nucleic acid-binding isoform X1
111	3.97588e-77	0.507547	0.609	0.432	5.38891e-73	Reconstitution	Bpl_scaf_57017-0.4	1446	GO:0005391,GO:0005524,GO:0006813,GO:0008152,GO:0016021,GO:0035725,GO:0046872	K01539	sodium potassium-transporting ATPase subunit alpha-like
112	1.46096e-75	0.420327	0.408	0.231	1.98019e-71	Reconstitution	Bpl_scaf_1372-10.30	595	GO:0003700,GO:0005634,GO:0006355,GO:0006915,GO:0044212,GO:0051262	K10149	delta-N p63 p73
113	3.94577e-75	0.443504	0.443	0.261	5.3481e-71	Reconstitution	Bpl_scaf_63665-1.12	9114	-	-	Cytadherence high molecular weight 2
114	1.00301e-70	0.487606	0.338	0.177	1.35948e-66	Reconstitution	Bpl_scaf_60262-0.0	233	-	-	PREDICTED: uncharacterized protein LOC105321561
115	5.69565e-65	0.604922	0.274	0.131	7.71989e-61	Reconstitution	Bpl_scaf_59940-0.6	336	-	-	---NA---
116	6.36586e-64	0.405894	0.774	0.629	8.62828e-60	Reconstitution	Bpl_scaf_52731-7.15	101	GO:0003746,GO:0006414,GO:0008168,GO:0032259	K03233	elongation factor 1-gamma-like, partial
117	5.33499e-63	0.50014	0.387	0.229	7.23105e-59	Reconstitution	Bpl_scaf_56354-7.8	997	-	-	Reticulocyte-binding 2 a
118	0	3.4602	0.901	0.229	0	Starvation	Bpl_scaf_22849-1.5	139	-	-	---NA---
119	0	2.40386	0.789	0.274	0	Starvation	Bpl_scaf_20338-0.1	110	-	-	, partial
120	0	1.37101	0.442	0.058	0	Starvation	Bpl_scaf_34471-1.10	221	-	K06721	asialoglyco receptor 1 isoform X1
121	0	1.35396	0.71	0.328	0	Starvation	Bpl_scaf_62453-0.8	70	-	-	conserved hypothetical protein, fragment
122	0	1.27569	0.598	0.249	0	Starvation	Bpl_scaf_2518-0.1	54	-	-	---NA---
123	0	1.08788	0.461	0.065	0	Starvation	Bpl_scaf_22849-0.1	452	-	-	RNA-directed DNA polymerase from mobile element jockey-like
124	0	0.99851	0.486	0.146	0	Starvation	Bpl_scaf_10745-0.1	551	-	-	---NA---
125	1.67421e-272	0.750798	0.359	0.08	2.26923e-268	Starvation	Bpl_scaf_40143-0.7	295	-	-	GTPase IMAP family member 4-like
126	8.54821e-268	1.47705	0.434	0.134	1.15862e-263	Starvation	Bpl_scaf_19166-1.14	405	-	-	PREDICTED: uncharacterized protein LOC105328034
127	1.92986e-244	0.732461	0.262	0.038	2.61573e-240	Starvation	Bpl_scaf_57916-0.0	100	-	-	---NA---
128	1.83636e-238	0.97596	0.479	0.184	2.48901e-234	Starvation	Bpl_scaf_59651-0.3	127	-	-	---NA---
129	3.98707e-233	2.10306	0.449	0.173	5.40408e-229	Starvation	Bpl_scaf_17778-1.17	4627	GO:0003777,GO:0003779,GO:0005524,GO:0007018,GO:0016301,GO:0016310,GO:0016887,GO:0030286	K10408	dynein heavy chain 10, axonemal-like isoform X1
130	2.10252e-186	0.649111	0.32	0.096	2.84975e-182	Starvation	Bpl_scaf_35263-1.8	295	-	-	GTPase IMAP family member 4
131	5.66828e-177	1.0842	0.25	0.056	7.68279e-173	Starvation	Bpl_scaf_52188-1.15	414	GO:0016020	-	deleted in malignant brain tumors 1 -like
132	3.30358e-173	1.3141	0.395	0.156	4.47767e-169	Starvation	Bpl_scaf_45750-0.6	509	GO:0000922,GO:0005815,GO:0007020	K16570	gamma-tubulin complex component 3 homolog
133	1.39617e-143	0.509049	0.296	0.098	1.89238e-139	Starvation	Bpl_scaf_2201-14.14	110	-	-	---NA---
134	1.57605e-138	0.840281	0.6	0.385	2.13618e-134	Starvation	Bpl_scaf_158-0.9	205	-	-	C-type lectin 9
135	2.64502e-135	1.63499	0.407	0.196	3.58506e-131	Starvation	Bpl_scaf_32538-10.8	351	-	-	Serine threonine- kinase ULK4
136	6.55772e-119	1.03098	0.453	0.251	8.88833e-115	Starvation	Bpl_scaf_63069-1.25	363	-	-	---NA---
137	6.24272e-118	0.731418	0.389	0.186	8.46139e-114	Starvation	Bpl_scaf_23804-0.9	181	-	-	wsc domain-containing
138	1.76299e-115	0.641782	0.268	0.097	2.38955e-111	Starvation	Bpl_scaf_20639-0.0	99	-	-	---NA---
139	1.54246e-112	1.36738	0.811	0.711	2.09064e-108	Starvation	Bpl_scaf_38266-13.9	291	-	-	Collagen alpha-5(VI) chain
140	8.46551e-104	0.48547	0.924	0.884	1.14742e-99	Starvation	Bpl_scaf_43962-2.9	461	GO:0003746,GO:0003924,GO:0005525,GO:0005737,GO:0006414	K03231	elongation factor 1 alpha
141	8.33845e-102	0.597388	0.255	0.097	1.13019e-97	Starvation	Bpl_scaf_63539-1.16	154	-	-	hypothetical protein NEMVEDRAFT_v1g248679
142	1.71591e-101	0.597266	0.466	0.269	2.32575e-97	Starvation	Bpl_scaf_14490-0.6	245	-	-	low-density lipo receptor-related 4-like
143	2.59958e-90	0.676921	0.252	0.103	3.52347e-86	Starvation	Bpl_scaf_25165-3.8	283	-	-	caspase
144	3.69298e-77	0.544103	0.269	0.127	5.00547e-73	Starvation	Bpl_scaf_58694-0.22	158	-	-	C-type lectin
145	1.91303e-72	0.525172	0.4	0.242	2.59292e-68	Starvation	Bpl_scaf_54265-1.13	1333	GO:0005488	K17916	Kinesin KIF16B
146	1.15869e-71	0.504924	0.77	0.677	1.57049e-67	Starvation	Bpl_scaf_14738-4.9	556	GO:0097159,GO:1901363	K13161	heterogeneous nuclear ribonucleo Q isoform X3
147	1.41051e-65	0.419789	0.389	0.237	1.9118e-61	Starvation	Bpl_scaf_19387-3.11	344	-	-	microtubule-associated futsch-like isoform X1
148	1.44143e-63	0.435676	0.272	0.14	1.95371e-59	Starvation	Bpl_scaf_55758-0.1	169	-	-	---NA---
149	1.45508e-58	0.532218	0.43	0.283	1.97221e-54	Starvation	Bpl_scaf_35727-1.14	1566	-	-	myosin-10-like isoform X17
150	1.66002e-54	0.438895	0.321	0.189	2.24999e-50	Starvation	Bpl_scaf_40313-0.37	2561	-	-	PREDICTED: uncharacterized protein LOC105338484 isoform X2
151	2.95953e-54	0.608459	0.517	0.376	4.01135e-50	Starvation	Bpl_scaf_19372-2.10	2771	-	-	golgin subfamily B member 1-like
152	7.25539e-52	0.819967	0.635	0.534	9.83396e-48	Starvation	Bpl_scaf_38266-12.5	295	-	-	Collagen alpha-5(VI) chain
153	1.70613e-48	0.425283	0.432	0.307	2.31249e-44	Starvation	Bpl_scaf_1371-5.6	321	GO:0000166,GO:0003676,GO:0019013,GO:0030529	K12741	heterogeneous nuclear ribonucleo A1-like isoform X1
154	8.7001e-48	0.424551	0.545	0.424	1.17921e-43	Starvation	Bpl_scaf_9391-2.10	1182	-	K17987	next to BRCA1 gene 1 -like isoform X1
155	3.51917e-43	0.451566	0.561	0.459	4.76989e-39	Starvation	Bpl_scaf_64706-0.15	825	-	K15047	heterogeneous nuclear ribonucleo U 1
156	1.69615e-40	0.415329	0.578	0.474	2.29896e-36	Starvation	Bpl_scaf_44465-0.53	368	GO:0005524,GO:0005737,GO:0005856	K05692	cytoplasmic actin
157	1.59391e-39	0.406174	0.45	0.332	2.16039e-35	Starvation	Bpl_scaf_26572-2.21	408	-	K11291	histone-binding N1 N2-like isoform X2
158	1.88495e-35	0.461277	0.458	0.342	2.55487e-31	Starvation	Bpl_scaf_22362-6.9	2026	GO:0035253,GO:0051297	K16469	rootletin-like isoform X7
159	1.16149e-29	0.471985	0.328	0.235	1.57428e-25	Starvation	Bpl_scaf_12540-1.42	78	GO:0003774,GO:0003779,GO:0005524,GO:0008152,GO:0016459,GO:0030833	-	Myosin heavy chain, striated muscle, partial
160	2.11372e-19	0.465367	0.537	0.484	2.86493e-15	Starvation	Bpl_scaf_58053-0.13	62	-	-	---NA---
161	2.52472e-14	0.442801	0.31	0.248	3.42201e-10	Starvation	Bpl_scaf_56339-14.6	1454	-	-	PREDICTED: uncharacterized protein LOC105326108 isoform X5
162	1.05547e-10	0.606795	0.565	0.52	1.43059e-06	Starvation	Bpl_scaf_15801-3.45	5072	-	-	titin-like isoform X1
163	4.32255e-10	0.64935	0.653	0.628	5.85879e-06	Starvation	Bpl_scaf_11625-1.11	1564	-	K06236	fibril-forming collagen alpha chain-like
164	5.17571e-10	0.789645	0.648	0.632	7.01515e-06	Starvation	Bpl_scaf_17465-2.8	1438	-	K19719	collagen alpha-1(II) chain isoform X1
165	6.00055e-07	0.426966	0.377	0.339	0.00813315	Starvation	Bpl_scaf_15801-5.10	8355	-	K12567	titin-like isoform X1

## Sheet: Supplementary File 1g
Supplementary File 1g. Cell cluster specific Differentially expressed genes among the three deep-sea in situ treatments treatments, the Basal membrane cell 1.
	p_val	avg_log2FC	pct.1	pct.2	p_val_adj	cluster	gene	Prot_Length	GO_ID	KEGG_ko	Description
1	2.35437e-119	3.24416	0.739	0.035	3.19111e-115	Fanmao	Bpl_scaf_36688-0.22	446	-	-	H5p, partial
2	9.69506e-49	1.25141	0.291	0.005	1.31407e-44	Fanmao	Bpl_scaf_43051-0.3	233	-	-	PREDICTED: uncharacterized protein LOC105335571
3	2.96455e-47	1.42525	0.4	0.036	4.01816e-43	Fanmao	Bpl_scaf_35290-1.7	352	-	-	flocculation FLO10-like
4	1.89744e-45	1.34414	0.394	0.037	2.57179e-41	Fanmao	Bpl_scaf_14002-1.10	209	-	-	baculoviral IAP repeat-containing 7-A-like
5	2.25482e-44	1.35274	0.412	0.046	3.05618e-40	Fanmao	Bpl_scaf_61985-5.10	2593	-	K04437	filamin -1
6	1.86047e-42	1.30517	0.358	0.029	2.52169e-38	Fanmao	Bpl_scaf_31664-2.6	131	-	-	---NA---
7	1.72562e-38	1.12815	0.321	0.027	2.33891e-34	Fanmao	Bpl_scaf_54651-5.17	193	GO:0005515	-	PREDICTED: myophilin-like
8	3.87984e-36	1.81889	0.667	0.264	5.25874e-32	Fanmao	Bpl_scaf_63703-4.35	72	GO:0046872	-	MT22_MYTED ame: Full=Metallothionein 20-II Short=MT-20-II
9	1.92861e-28	1.49128	0.473	0.133	2.61403e-24	Fanmao	Bpl_scaf_57259-5.3	629	-	-	cytoplasmic intermediate filament A
10	4.94715e-14	1.05957	0.642	0.432	6.70537e-10	Fanmao	Bpl_scaf_13236-2.10	263	GO:0004322,GO:0005623,GO:0006826,GO:0006879,GO:0008199,GO:0055114	K00522	Soma ferritin
11	1.34141e-12	0.82422	0.315	0.112	1.81815e-08	Fanmao	Bpl_scaf_2581-2.10	1052	GO:0006355,GO:0007379,GO:0008023,GO:0009952,GO:0070062,GO:0090090,GO:2000096	K15187	AF-9 isoform X2
12	2.31269e-11	0.91226	0.624	0.418	3.13462e-07	Fanmao	Bpl_scaf_22242-2.44	432	GO:0003924,GO:0005200,GO:0005525,GO:0005737,GO:0005874,GO:0007017,GO:0008152,GO:0021634,GO:0043066,GO:0051258	K07374	tubulin alpha-1A chain-like, partial
13	1.39122e-09	0.756432	0.345	0.163	1.88566e-05	Fanmao	Bpl_scaf_22089-0.17	392	GO:0016021	K16336	syndecan-like isoform X1
14	1.49364e-09	0.799627	0.345	0.158	2.02448e-05	Fanmao	Bpl_scaf_31119-4.18	162	-	-	perlucin 6
15	1.59928e-09	3.34603	0.358	0.182	2.16766e-05	Fanmao	Bpl_scaf_29041-0.21	235	-	-	---NA---
16	3.24979e-09	0.616545	0.279	0.109	4.40477e-05	Fanmao	Bpl_scaf_52001-2.8	201	-	K12462	Rho GDP-dissociation inhibitor 1
17	3.75894e-09	0.693824	0.255	0.096	5.09487e-05	Fanmao	Bpl_scaf_53773-0.13	233	-	-	vitelline membrane outer layer 1-like
18	4.08734e-09	0.787203	0.406	0.214	5.53998e-05	Fanmao	Bpl_scaf_24592-4.10	500	GO:0003743,GO:0004386,GO:0005524,GO:0006413	K03257	eukaryotic initiation factor 4A-I-like
19	1.56431e-08	0.973761	0.539	0.364	0.000212027	Fanmao	Bpl_scaf_1905-1.32	679	-	K11722	bromodomain-containing 3-like isoform X1
20	1.36219e-07	0.514242	0.303	0.142	0.00184631	Fanmao	Bpl_scaf_1371-2.4	1108	-	K06825	Zonadhesin
21	1.90936e-07	1.36751	0.309	0.149	0.00258794	Fanmao	Bpl_scaf_63703-4.15	667	-	-	Inhibitor of apoptosis
22	1.9553e-07	0.474066	0.267	0.105	0.00265021	Fanmao	Bpl_scaf_52907-1.12	341	-	K01771	1-phosphatidylinositol phosphodiesterase-like
23	2.95193e-07	0.687872	0.303	0.15	0.00400105	Fanmao	Bpl_scaf_14002-3.3	366	GO:0004054,GO:0005524,GO:0016310	K00933	arginine kinase
24	6.31462e-07	1.01238	0.552	0.495	0.00855883	Fanmao	Bpl_scaf_64398-0.3	115	-	-	---NA---
25	1.59061e-06	0.65402	0.394	0.236	0.0215591	Fanmao	Bpl_scaf_1365-0.2	107	-	-	prostate-associated microsemino -like
26	1.66713e-06	2.69846	0.43	0.285	0.0225963	Fanmao	Bpl_scaf_268-5.8	509	-	-	serine threonine- phosphatase 6 regulatory ankyrin repeat subunit B-like
27	2.03613e-06	0.572397	0.879	0.892	0.0275977	Fanmao	Bpl_scaf_48581-0.7	224	-	-	PREDICTED: uncharacterized protein LOC105328788 isoform X2
28	2.23997e-06	1.45401	0.255	0.127	0.0303606	Fanmao	Bpl_scaf_54629-0.4	977	-	-	hypothetical protein DAPPUDRAFT_105663
29	1.97089e-05	0.557524	0.588	0.45	0.267135	Fanmao	Bpl_scaf_38266-3.33	402	GO:0003735,GO:0005840,GO:0006412	K02925	60S ribosomal L3
30	4.63151e-05	1.04603	0.297	0.168	0.627754	Fanmao	Bpl_scaf_59360-0.26	105	-	-	---NA---
31	0.000150397	0.565625	0.503	0.382	1	Fanmao	Bpl_scaf_15478-2.4	344	GO:0005840,GO:0042254	K02941	60S acidic ribosomal P0
32	0.00015891	0.669026	0.255	0.147	1	Fanmao	Bpl_scaf_59648-5.10	1391	-	K10369	Supervillin
33	0.000407282	0.547358	0.436	0.317	1	Fanmao	Bpl_scaf_5538-4.10	284	-	K10373	TPM_PERVI ame: Full=Tropomyosin
34	0.00042518	0.600378	0.624	0.551	1	Fanmao	Bpl_scaf_53568-3.4	69	GO:0000022,GO:0005840,GO:0017022,GO:0022008	K02894	60S ribosomal L23
35	0.000537599	0.42641	0.721	0.738	1	Fanmao	Bpl_scaf_29375-1.23	184	-	-	---NA---
36	0.000554455	0.496411	0.618	0.547	1	Fanmao	Bpl_scaf_7842-4.11	280	GO:0003729,GO:0003735,GO:0005654,GO:0005925,GO:0006412,GO:0016020,GO:0017134,GO:0019899,GO:0022627,GO:0051347,GO:0070062	K02981	40S ribosomal S2
37	0.000566902	0.578187	0.612	0.563	1	Fanmao	Bpl_scaf_44032-0.1	203	GO:0003735,GO:0006412,GO:0015934	K02872	60S ribosomal L13A
38	0.000804762	0.417464	0.321	0.213	1	Fanmao	Bpl_scaf_16054-2.22	136	GO:0000183,GO:0000788,GO:0000979,GO:0000980,GO:0001649,GO:0001740,GO:0005654,GO:0005700,GO:0006336,GO:0006997,GO:0007140,GO:0007155,GO:0007264,GO:0007420,GO:0007596,GO:0008270,GO:0008360,GO:0009725,GO:0010467,GO:0030307,GO:0031492,GO:0032776,GO:0033554,GO:0042393,GO:0042692,GO:0046982,GO:0070062,GO:0090230,GO:0098770,GO:1902340	K11253	histone
39	0.00103035	0.512015	0.424	0.326	1	Fanmao	Bpl_scaf_21209-0.8	376	GO:0000281,GO:0005524,GO:0005884,GO:0005938,GO:0007126,GO:0009790,GO:0016887,GO:0030036,GO:0040011	K05692	actin, cytoplasmic
40	0.00113914	0.672692	0.388	0.299	1	Fanmao	Bpl_scaf_5499-2.14	1245	GO:0003774,GO:0003779,GO:0005524,GO:0005654,GO:0007154,GO:0008152,GO:0012505,GO:0016023,GO:0016043,GO:0016459,GO:0030182,GO:0031090,GO:0042995,GO:0044700,GO:0044765,GO:0048839,GO:0050794,GO:0051649,GO:0051716,GO:0071702,GO:0097458	K10358	unconventional myosin-VI-like
41	0.00148856	0.701454	0.576	0.531	1	Fanmao	Bpl_scaf_58896-4.11	2052	-	K11643	chromodomain-helicase-DNA-binding 4-like isoform X3
42	0.00198398	0.720411	0.576	0.514	1	Fanmao	Bpl_scaf_3539-1.26	1005	-	K16806	microtubule-associated futsch-like isoform X17
43	0.00334866	0.518224	0.582	0.517	1	Fanmao	Bpl_scaf_20231-3.4	419	GO:0005524	-	heat shock cognate 70
44	0.00377202	0.409345	0.733	0.719	1	Fanmao	Bpl_scaf_46488-6.34	128	GO:0005840	K02975	ribosomal S25
45	0.00475981	0.457054	0.752	0.79	1	Fanmao	Bpl_scaf_49180-1.5	1989	GO:0005622,GO:0035556,GO:0046872	K18061	myotubularin-related 13-like isoform X4
46	0.00517239	0.479823	0.382	0.29	1	Fanmao	Bpl_scaf_63703-4.30	110	GO:0005758,GO:0006122,GO:0006123,GO:0009055,GO:0020037,GO:0043280,GO:0046872,GO:0070469	K08738	cytochrome c
47	0.0060632	0.518123	0.327	0.246	1	Fanmao	Bpl_scaf_3428-3.15	153	GO:0003735,GO:0005840,GO:0006412	K02953	40S ribosomal S13
48	0.00937721	0.578639	0.406	0.336	1	Fanmao	Bpl_scaf_31501-7.9	2308	-	K19947	methionine sulfoxide oxidase mical2b-like isoform #REF!
49	2.6123e-150	4.80241	0.83	0.015	3.54072e-146	Reconstitution	Bpl_scaf_55952-0.12	714	-	-	---NA---
50	2.41299e-50	2.01691	0.502	0.085	3.27057e-46	Reconstitution	Bpl_scaf_43856-2.10	1475	-	-	---NA---
51	8.91542e-49	1.49256	0.526	0.107	1.2084e-44	Reconstitution	Bpl_scaf_33596-7.3	258	-	-	carbonic anhydrase 1-like
52	2.79333e-46	1.69178	0.332	0.015	3.78608e-42	Reconstitution	Bpl_scaf_21899-0.25	78	-	-	disintegrin and metallo ase domain-containing 10-like isoform X1
53	1.17439e-34	1.68779	0.27	0.017	1.59176e-30	Reconstitution	Bpl_scaf_32311-1.19	93	-	-	solute carrier family 23 member 1-like
54	2.20394e-34	1.07497	0.353	0.055	2.98722e-30	Reconstitution	Bpl_scaf_23346-2.5	484	GO:0005634,GO:0005829,GO:0008430,GO:0015031,GO:0016020	K17285	Selenium-binding 1, partial
55	1.09866e-32	2.00685	0.412	0.095	1.48913e-28	Reconstitution	Bpl_scaf_40880-0.16	482	-	-	serine threonine- phosphatase 6 regulatory ankyrin repeat subunit B-like isoform X1
56	1.51179e-30	1.68071	0.291	0.037	2.04908e-26	Reconstitution	Bpl_scaf_62409-0.16	935	GO:0005488	-	PREDICTED: uncharacterized protein LOC105333786 isoform X2
57	1.11499e-25	0.775635	0.277	0.043	1.51125e-21	Reconstitution	Bpl_scaf_62441-3.7	198	-	K17725	persulfide dioxygenase ETHE1, mitochondrial-like isoform X1
58	1.97165e-25	1.09831	0.374	0.096	2.67238e-21	Reconstitution	Bpl_scaf_16489-0.6	497	-	-	neural-cadherin 2
59	4.03941e-25	1.08791	0.308	0.059	5.47502e-21	Reconstitution	Bpl_scaf_16935-0.17	266	-	-	A disintegrin and metallo ase with thrombospondin motifs gon-1-like
60	2.30821e-23	1.30641	0.772	0.521	3.12855e-19	Reconstitution	Bpl_scaf_6901-7.5	2075	-	K00698	Chitin synthase 1
61	3.64714e-23	1.21592	0.844	0.619	4.94333e-19	Reconstitution	Bpl_scaf_47525-1.6	531	-	-	---NA---
62	4.42697e-22	1.17838	0.45	0.174	6.00031e-18	Reconstitution	Bpl_scaf_48945-0.2	306	-	-	zinc finger MYM-type 4-like
63	9.16882e-21	1.44	0.619	0.319	1.24274e-16	Reconstitution	Bpl_scaf_58954-2.7	184	GO:0044765	-	Transient receptor potential cation channel subfamily M member 3
64	2.08259e-20	0.739621	0.284	0.067	2.82274e-16	Reconstitution	Bpl_scaf_52907-1.12	341	-	K01771	1-phosphatidylinositol phosphodiesterase-like
65	2.35234e-19	0.863818	0.602	0.319	3.18836e-15	Reconstitution	Bpl_scaf_25973-3.4	88	-	-	---NA---
66	1.70197e-18	0.973401	0.481	0.218	2.30685e-14	Reconstitution	Bpl_scaf_48274-0.3	257	-	K01672	carbonic anhydrase 1-like
67	4.23427e-18	0.469829	0.834	0.581	5.73913e-14	Reconstitution	Bpl_scaf_15404-0.0	189	-	-	---NA---
68	3.51462e-17	0.606224	0.664	0.436	4.76372e-13	Reconstitution	Bpl_scaf_16371-0.14	361	-	-	Cartilage matrix
69	3.35209e-16	1.0551	0.567	0.335	4.54343e-12	Reconstitution	Bpl_scaf_4833-2.22	958	-	K12875	apoptotic chromatin condensation inducer in the nucleus-like
70	1.38967e-15	0.620779	0.26	0.072	1.88357e-11	Reconstitution	Bpl_scaf_35916-0.6	435	GO:0006629,GO:0016021,GO:0016491,GO:0055114	K10226	fatty acid desaturase 1-like isoform X1
71	2.08181e-15	0.976307	0.291	0.096	2.82168e-11	Reconstitution	Bpl_scaf_21636-3.10	143	GO:0003756,GO:0005783,GO:0008152,GO:0009986,GO:0009987,GO:0043277,GO:2000427	K13984	thioredoxin domain-containing 5
72	4.68118e-15	0.757451	0.419	0.181	6.34487e-11	Reconstitution	Bpl_scaf_13642-5.8	654	GO:0005328,GO:0006836,GO:0016021,GO:0051536,GO:0055085	K05038	sodium- and chloride-dependent glycine transporter 1-like
73	1.31667e-14	0.832013	0.391	0.165	1.78462e-10	Reconstitution	Bpl_scaf_58948-1.5	784	GO:0016020	K19502	anoctamin-8-like isoform X1
74	3.46039e-14	0.775849	0.498	0.268	4.69021e-10	Reconstitution	Bpl_scaf_63348-10.10	700	GO:0003676,GO:0004386,GO:0005524,GO:0008152	K12823	probable ATP-dependent RNA helicase DDX5 isoform X1
75	4.9886e-14	0.623074	0.256	0.081	6.76155e-10	Reconstitution	Bpl_scaf_29450-1.2	237	GO:0003700,GO:0003707,GO:0005496,GO:0005634,GO:0006351,GO:0006355,GO:0008270,GO:0043401,GO:0043565	K08554	steroid hormone receptor ERR2-like isoform X1
76	1.2754e-13	0.750937	0.394	0.183	1.72868e-09	Reconstitution	Bpl_scaf_46270-3.13	1536	-	K03260	eukaryotic translation initiation factor 4 gamma 1-like isoform X3
77	4.40357e-13	0.739542	0.391	0.183	5.9686e-09	Reconstitution	Bpl_scaf_61662-2.9	348	GO:0008270,GO:0016491,GO:0055114	-	geraniol dehydrogenase 1-like isoform X2
78	1.0011e-12	0.646717	0.266	0.091	1.35689e-08	Reconstitution	Bpl_scaf_19670-0.11	1649	GO:0016020	-	neural-cadherin 2
79	1.1881e-12	0.899244	0.55	0.316	1.61036e-08	Reconstitution	Bpl_scaf_32300-1.15	652	-	-	baculoviral IAP repeat-containing 7-B-like
80	1.83985e-12	0.769393	0.651	0.459	2.49373e-08	Reconstitution	Bpl_scaf_34764-3.19	728	-	K11294	nucleolin-like isoform X1
81	2.58974e-12	0.878842	0.363	0.165	3.51013e-08	Reconstitution	Bpl_scaf_55333-2.10	1065	GO:0006629,GO:0007165,GO:0008081	K05858	1-phosphatidylinositol 4,5-bisphosphate phosphodiesterase beta-4-like, partial
82	3.03404e-12	0.801275	0.332	0.142	4.11234e-08	Reconstitution	Bpl_scaf_1-0.2	477	-	-	heat shock 70 kDa 12A-like
83	6.31037e-12	0.628137	0.332	0.142	8.55308e-08	Reconstitution	Bpl_scaf_16621-2.3	453	-	K15616	eyes absent homolog 1-like isoform X14
84	7.78805e-12	0.623479	0.543	0.322	1.05559e-07	Reconstitution	Bpl_scaf_681-3.14	1594	-	K12331	rho guanine nucleotide exchange factor 11-like isoform X18
85	2.0548e-10	0.586112	0.325	0.151	2.78508e-06	Reconstitution	Bpl_scaf_24834-2.3	551	-	K19600	tubby-related 3-like isoform X4
86	4.76081e-10	0.587454	0.9	0.787	6.4528e-06	Reconstitution	Bpl_scaf_42979-0.15	767	GO:0000166,GO:0003676,GO:0006397	K12822	RNA-binding 25-like
87	1.24684e-09	0.525112	0.26	0.107	1.68996e-05	Reconstitution	Bpl_scaf_41724-1.2	484	-	-	RNA-directed DNA polymerase from transposon BS
88	1.36872e-09	0.530197	0.298	0.133	1.85517e-05	Reconstitution	Bpl_scaf_59648-12.37	657	GO:0005488	K09487	glucose-regulated 94
89	1.64563e-09	0.571011	0.346	0.172	2.23049e-05	Reconstitution	Bpl_scaf_50876-9.2	825	GO:0050789	K05730	vav-like isoform X7
90	1.91101e-09	0.582675	0.353	0.181	2.59018e-05	Reconstitution	Bpl_scaf_17533-3.13	1699	-	K10380	ankyrin-2-like isoform X8
91	2.04291e-09	0.595942	0.533	0.349	2.76896e-05	Reconstitution	Bpl_scaf_56339-11.18	2125	GO:0004672,GO:0016310	K08867	serine threonine- kinase WNK1-like isoform X5
92	2.57625e-09	0.593966	0.464	0.285	3.49185e-05	Reconstitution	Bpl_scaf_36595-6.57	376	GO:0000281,GO:0005524,GO:0005884,GO:0005886,GO:0005925,GO:0005938,GO:0007126,GO:0009790,GO:0016887,GO:0030036,GO:0040011,GO:0097433	K05692	actin
93	3.61789e-09	0.550451	0.374	0.197	4.90369e-05	Reconstitution	Bpl_scaf_57079-1.12	1502	GO:0000166	K09486	hypoxia up-regulated 1-like
94	4.12514e-09	0.505804	0.457	0.271	5.59122e-05	Reconstitution	Bpl_scaf_53568-2.6	1117	GO:0000413,GO:0003755,GO:0006457	K09566	peptidyl-prolyl cis-trans isomerase G-like
95	5.82999e-09	0.675003	0.398	0.223	7.90196e-05	Reconstitution	Bpl_scaf_61993-0.4	291	-	-	sushi, von Willebrand factor type A, EGF and pentraxin domain-containing 1 isoform X1
96	9.44209e-09	0.498754	0.336	0.172	0.000127978	Reconstitution	Bpl_scaf_4784-1.40	664	GO:0003777,GO:0005871,GO:0008152	K10407	kinesin light chain-like isoform X8
97	3.19603e-08	0.566035	0.301	0.151	0.000433189	Reconstitution	Bpl_scaf_63665-1.12	9114	-	-	Cytadherence high molecular weight 2
98	3.20044e-08	0.536559	0.315	0.165	0.000433788	Reconstitution	Bpl_scaf_1368-0.3	153	GO:0000154,GO:0030515,GO:0031428,GO:0032040	-	Nucleolar 58
99	4.96707e-08	0.513785	0.522	0.335	0.000673236	Reconstitution	Bpl_scaf_41044-1.15	329	GO:0000166,GO:0003676	K13044	heterogeneous nuclear ribonucleo D-like isoform X2
100	6.43254e-08	0.606423	0.547	0.373	0.000871866	Reconstitution	Bpl_scaf_60908-4.14	1782	GO:0005488,GO:0006464,GO:0016301,GO:0016310,GO:0050794	-	mitogen-activated kinase kinase kinase 14-like
101	7.78909e-08	0.488951	0.336	0.177	0.00105573	Reconstitution	Bpl_scaf_17051-11.32	2212	GO:0003824,GO:0008152	K10592	E3 ubiquitin- ligase HUWE1-like
102	8.98296e-08	0.510496	0.291	0.148	0.00121755	Reconstitution	Bpl_scaf_24370-0.5	168	-	-	globin-like isoform X3
103	1.19434e-07	0.418572	0.325	0.172	0.00161881	Reconstitution	Bpl_scaf_47325-1.19	1332	-	K11647	probable global transcription activator SNF2L2 isoform X1
104	1.36043e-07	0.536552	0.329	0.175	0.00184393	Reconstitution	Bpl_scaf_44427-3.9	1326	GO:0009987,GO:0016740,GO:0050896	K03515	DNA repair REV1 isoform X1
105	1.65854e-07	0.527693	0.27	0.134	0.00224798	Reconstitution	Bpl_scaf_21899-2.9	725	-	-	hepatoma-derived growth factor-related 2-like
106	1.75314e-07	0.593917	0.682	0.552	0.0023762	Reconstitution	Bpl_scaf_58266-2.19	3218	-	K16551	A-kinase anchor 9-like
107	1.91979e-07	0.488015	0.668	0.511	0.00260209	Reconstitution	Bpl_scaf_24012-4.8	936	GO:0005634,GO:0006397,GO:0008380	K13171	serine arginine repetitive matrix 1-like isoform X1
108	4.27223e-07	0.447736	0.287	0.152	0.00579059	Reconstitution	Bpl_scaf_51501-2.9	812	-	-	extended synaptotagmin 2 variant
109	5.11388e-07	0.54147	0.481	0.317	0.00693135	Reconstitution	Bpl_scaf_53773-4.12	542	-	K13098	RNA-binding FUS-like isoform X4
110	6.30942e-07	0.51895	0.287	0.154	0.00855179	Reconstitution	Bpl_scaf_21031-4.17	328	GO:0003333,GO:0015171,GO:0016021	K13868	b(0,+)-type amino acid transporter 1-like isoform X3
111	6.40335e-07	0.433689	0.394	0.229	0.0086791	Reconstitution	Bpl_scaf_60262-0.0	233	-	-	PREDICTED: uncharacterized protein LOC105321561
112	6.66904e-07	0.62075	0.564	0.43	0.00903921	Reconstitution	Bpl_scaf_2723-4.12	6596	GO:0003779,GO:0005635	K19326	nesprin-1-like isoform X3
113	8.69465e-07	0.41212	0.318	0.177	0.0117847	Reconstitution	Bpl_scaf_6901-1.10	3654	GO:0003824	K09188	histone-lysine N-methyltransferase 2C-like isoform X1
114	9.04225e-07	0.908729	0.263	0.133	0.0122559	Reconstitution	Bpl_scaf_59940-0.6	336	-	-	---NA---
115	9.59824e-07	0.439787	0.27	0.139	0.0130095	Reconstitution	Bpl_scaf_63657-1.5	903	GO:0001731,GO:0003743,GO:0005852,GO:0006446,GO:0016282,GO:0031369,GO:0033290	K03252	eukaryotic translation initiation factor 3 subunit C-like isoform X1
116	1.38254e-06	0.443529	0.336	0.195	0.0187389	Reconstitution	Bpl_scaf_13236-8.12	2127	-	K11653	trithorax group osa-like isoform X5
117	1.49125e-06	0.419294	0.263	0.137	0.0202123	Reconstitution	Bpl_scaf_57007-3.16	1835	-	K18261	myoferlin-like isoform X5
118	1.99789e-06	0.643158	0.408	0.252	0.0270795	Reconstitution	Bpl_scaf_22362-6.9	2026	GO:0035253,GO:0051297	K16469	rootletin-like isoform X7
119	2.86881e-06	0.429393	0.346	0.206	0.0388838	Reconstitution	Bpl_scaf_22752-0.9	485	GO:0000079,GO:0005634,GO:0006355,GO:0006396,GO:0019901	-	cyclin-L1 isoform X1
120	4.91041e-06	0.484099	0.547	0.415	0.0665556	Reconstitution	Bpl_scaf_50887-2.10	10308	-	K10382	microtubule-actin cross-linking factor 1, isoforms 1 2 3 5-like isoform X5
121	6.57896e-06	0.479733	0.28	0.162	0.0891712	Reconstitution	Bpl_scaf_56926-1.12	773	GO:0044699	-	very low-density lipo receptor isoform X3
122	7.88136e-06	0.56056	0.381	0.248	0.106824	Reconstitution	Bpl_scaf_26228-4.5	1121	GO:0000166,GO:0015630,GO:0043234,GO:0044430	K10395	Kinesin KIF21A
123	1.00815e-05	0.41812	0.266	0.151	0.136645	Reconstitution	Bpl_scaf_47429-6.10	1511	GO:0003677	K09313	homeobox cut-like 1 isoform X2
124	1.21271e-05	0.455962	0.381	0.248	0.164371	Reconstitution	Bpl_scaf_3123-3.15	2845	GO:0000166,GO:0017111	-	Dynein heavy chain, cytoplasmic
125	1.21613e-05	0.469139	0.266	0.155	0.164835	Reconstitution	Bpl_scaf_61340-10.5	535	GO:0003676	-	polypyrimidine tract-binding 1-like isoform X4
126	1.2329e-05	0.428633	0.336	0.21	0.167108	Reconstitution	Bpl_scaf_41789-0.6	69	GO:0000166,GO:0003676,GO:0019013,GO:0030529	-	Heterogeneous nuclear ribonucleo 27C
127	1.59998e-05	0.423597	0.415	0.277	0.216861	Reconstitution	Bpl_scaf_17533-3.20	1033	-	-	titin-like isoform X4
128	1.71802e-05	0.432491	0.311	0.192	0.23286	Reconstitution	Bpl_scaf_49856-0.2	404	-	K14946	RNA binding fox-1 homolog 2-like isoform X2
129	2.44245e-05	0.422586	0.339	0.212	0.331049	Reconstitution	Bpl_scaf_28870-6.10	1792	GO:0003777,GO:0005524,GO:0005871,GO:0005874,GO:0007018,GO:0008017,GO:0008152	-	myosin-2 heavy chain-like
130	2.74462e-05	0.535291	0.408	0.285	0.372006	Reconstitution	Bpl_scaf_48777-1.5	504	GO:0003676,GO:0046872	K09206	Krueppel-like factor 5
131	1.71982e-106	4.22426	0.794	0.099	2.33104e-102	Starvation	Bpl_scaf_20338-0.1	110	-	-	, partial
132	1.73441e-88	2.62096	0.747	0.126	2.35082e-84	Starvation	Bpl_scaf_22849-1.5	139	-	-	---NA---
133	3.83347e-32	1.56165	0.658	0.315	5.19588e-28	Starvation	Bpl_scaf_59651-0.3	127	-	-	---NA---
134	4.26625e-31	0.910214	0.295	0.018	5.78248e-27	Starvation	Bpl_scaf_5784-0.0	1168	-	-	Uncharacterized protein Tcan_13025
135	4.58994e-30	3.75909	0.251	0	6.2212e-26	Starvation	Bpl_scaf_18337-0.5	298	-	-	Tripartite motif-containing 45
136	6.01798e-28	2.27254	0.505	0.196	8.15677e-24	Starvation	Bpl_scaf_45750-0.6	509	GO:0000922,GO:0005815,GO:0007020	K16570	gamma-tubulin complex component 3 homolog
137	2.73593e-27	0.964038	0.963	0.835	3.70828e-23	Starvation	Bpl_scaf_7293-0.14	909	-	-	hemicentin-1-like, partial
138	4.78396e-27	1.59216	0.768	0.526	6.48418e-23	Starvation	Bpl_scaf_158-0.9	205	-	-	C-type lectin 9
139	1.57704e-26	5.18696	0.383	0.104	2.13752e-22	Starvation	Bpl_scaf_33028-0.7	255	-	-	PREDICTED: uncharacterized protein LOC105318574
140	2.12833e-25	1.06274	0.442	0.139	2.88474e-21	Starvation	Bpl_scaf_62453-0.8	70	-	-	conserved hypothetical protein, fragment
141	3.29813e-23	0.898542	0.774	0.548	4.47029e-19	Starvation	Bpl_scaf_33774-1.23	235	-	-	---NA---
142	2.16576e-22	1.01694	0.375	0.106	2.93547e-18	Starvation	Bpl_scaf_36437-0.3	51	-	-	---NA---
143	1.80319e-21	2.25637	0.385	0.121	2.44404e-17	Starvation	Bpl_scaf_17778-1.17	4627	GO:0003777,GO:0003779,GO:0005524,GO:0007018,GO:0016301,GO:0016310,GO:0016887,GO:0030286	K10408	dynein heavy chain 10, axonemal-like isoform X1
144	7.4554e-21	1.12589	0.393	0.132	1.01051e-16	Starvation	Bpl_scaf_63539-1.16	154	-	-	hypothetical protein NEMVEDRAFT_v1g248679
145	4.64855e-19	1.11953	0.438	0.183	6.30064e-15	Starvation	Bpl_scaf_27182-0.8	806	GO:0016043	K08017	villin-1-like isoform X3
146	6.47093e-19	1.34646	0.462	0.192	8.7707e-15	Starvation	Bpl_scaf_19166-1.14	405	-	-	PREDICTED: uncharacterized protein LOC105328034
147	1.04232e-18	0.743144	0.654	0.443	1.41276e-14	Starvation	Bpl_scaf_38731-0.48	1311	-	-	zonadhesin-like isoform X3
148	1.39251e-17	0.720606	0.273	0.062	1.8874e-13	Starvation	Bpl_scaf_9460-0.2	73	-	-	---NA---
149	2.69657e-17	0.674868	0.481	0.236	3.65493e-13	Starvation	Bpl_scaf_11110-0.2	346	-	-	mucin 17
150	4.60594e-17	0.878904	0.593	0.401	6.24289e-13	Starvation	Bpl_scaf_56162-7.21	741	-	-	c-binding -like
151	4.39176e-16	0.636106	0.428	0.185	5.9526e-12	Starvation	Bpl_scaf_65520-1.6	108	-	-	hypothetical protein BRAFLDRAFT_84494
152	1.9852e-15	0.568923	0.342	0.115	2.69074e-11	Starvation	Bpl_scaf_10745-0.1	551	-	-	---NA---
153	2.08879e-15	0.702014	0.312	0.104	2.83114e-11	Starvation	Bpl_scaf_2518-0.1	54	-	-	---NA---
154	2.11783e-14	0.63794	0.322	0.117	2.8705e-10	Starvation	Bpl_scaf_10139-10.15	636	-	K13165	splicing regulatory glutamine lysine-rich 1-like isoform X7
155	8.25707e-14	0.719692	0.796	0.667	1.11916e-09	Starvation	Bpl_scaf_56162-7.6	374	-	-	threonine-rich GPI-anchored glyco
156	1.027e-12	0.838709	0.505	0.282	1.392e-08	Starvation	Bpl_scaf_63069-1.25	363	-	-	---NA---
157	1.11505e-12	0.701287	0.851	0.738	1.51134e-08	Starvation	Bpl_scaf_43962-2.9	461	GO:0003746,GO:0003924,GO:0005525,GO:0005737,GO:0006414	K03231	elongation factor 1 alpha
158	4.10884e-12	0.572116	0.428	0.222	5.56912e-08	Starvation	Bpl_scaf_29497-1.11	284	-	-	chitin binding beak 1
159	1.48788e-11	0.523508	0.35	0.152	2.01667e-07	Starvation	Bpl_scaf_31501-22.13	1830	GO:0005622,GO:0006886,GO:0016020,GO:0017137	K17598	Synaptotagmin 5
160	1.56084e-11	0.531485	0.45	0.242	2.11557e-07	Starvation	Bpl_scaf_6185-3.6	366	GO:0004497,GO:0005788,GO:0030433,GO:0055114	-	FAD-dependent oxidoreductase domain-containing 2-like
161	2.94364e-11	1.09104	0.265	0.099	3.98982e-07	Starvation	Bpl_scaf_34471-1.10	221	-	K06721	asialoglyco receptor 1 isoform X1
162	8.84286e-11	0.607781	0.627	0.456	1.19856e-06	Starvation	Bpl_scaf_56353-3.26	78	-	-	---NA---
163	6.8778e-10	0.501196	0.393	0.233	9.32218e-06	Starvation	Bpl_scaf_63013-1.18	195	-	-	BPTI Kunitz domain-containing 4-like
164	3.65179e-09	0.622367	0.418	0.264	4.94963e-05	Starvation	Bpl_scaf_57637-0.0	74	-	-	---NA---
165	6.57943e-09	0.773699	0.259	0.115	8.91777e-05	Starvation	Bpl_scaf_43116-1.54	391	-	-	---NA---
166	5.00308e-08	0.416567	0.462	0.289	0.000678118	Starvation	Bpl_scaf_20675-2.12	1255	GO:0003723	-	vigilin-like isoform X1
167	1.5985e-07	0.420913	0.466	0.311	0.0021666	Starvation	Bpl_scaf_44428-7.8	330	GO:0005509	-	calumenin-like isoform X1
168	1.80123e-07	0.700074	0.334	0.203	0.00244139	Starvation	Bpl_scaf_44362-6.48	89	GO:0016337,GO:0030246	-	carcinolectin 5a isoform
169	2.2193e-07	0.443933	0.381	0.222	0.00300804	Starvation	Bpl_scaf_62441-11.7	1177	GO:0007165,GO:0008081,GO:0016042	K01116	1-phosphatidylinositol 4,5-bisphosphate phosphodiesterase gamma-1-like isoform X2
170	5.14784e-07	0.57019	0.255	0.128	0.00697738	Starvation	Bpl_scaf_25165-3.8	283	-	-	caspase
171	3.05336e-06	0.409438	0.503	0.359	0.0413852	Starvation	Bpl_scaf_62453-5.2	150	-	-	PREDICTED: uncharacterized protein LOC105339482
172	1.28314e-05	0.453296	0.749	0.617	0.173917	Starvation	Bpl_scaf_58007-2.15	119	GO:0003735,GO:0006412,GO:0016020,GO:0022627,GO:0044822,GO:0070062	K02969	40S ribosomal S20
173	1.82997e-05	0.44817	0.56	0.427	0.248034	Starvation	Bpl_scaf_31501-17.32	526	GO:0003677,GO:0006355	K09048	cyclic AMP-responsive element-binding 3 2 isoform X1
174	0.000120392	0.42495	0.391	0.289	1	Starvation	Bpl_scaf_45479-0.6	92	GO:0003735,GO:0005840,GO:0006412,GO:0046872	K02921	60S ribosomal L37a
175	0.00778638	0.445465	0.904	0.874	1	Starvation	Bpl_scaf_48581-0.7	224	-	-	PREDICTED: uncharacterized protein LOC105328788 isoform X2

## Sheet: Supplementary File 1h
Supplementary File 1h. Cell cluster specific Differentially expressed genes among the three deep-sea in situ treatments treatments, the Basal membrane cell 2.
	p_val	avg_log2FC	pct.1	pct.2	p_val_adj	cluster	gene	Prot_Length	GO_ID	KEGG_ko	Description
13	0.000244052	0.785814	0.754	0.812	1	Fanmao	Bpl_scaf_57006-3.25	1811	GO:0008092,GO:0044424	K06107	Band 3
18	0.00638864	0.843582	0.424	0.412	1	Fanmao	Bpl_scaf_1905-1.32	679	-	K11722	bromodomain-containing 3-like isoform X1
16	0.000415841	0.79495	0.199	0.374	1	Fanmao	Bpl_scaf_24225-0.12	287	-	K04397	caspase-7-like isoform X1
12	1.82334e-06	1.03361	0.618	0.598	0.0247136	Fanmao	Bpl_scaf_58896-4.11	2052	-	K11643	chromodomain-helicase-DNA-binding 4-like isoform X3
11	3.02403e-11	1.27712	0.34	0.174	4.09877e-07	Fanmao	Bpl_scaf_57259-5.3	629	-	-	cytoplasmic intermediate filament A
17	0.0035871	0.715787	0.298	0.236	1	Fanmao	Bpl_scaf_24592-4.10	500	GO:0003743,GO:0004386,GO:0005524,GO:0006413	K03257	eukaryotic initiation factor 4A-I-like
14	0.000326618	0.891355	0.398	0.341	1	Fanmao	Bpl_scaf_33028-1.7	603	GO:0003779,GO:0005737,GO:0005856,GO:0019898	K05762	ezrin radixin moesin
6	5.67218e-21	1.0731	0.257	0.058	7.68807e-17	Fanmao	Bpl_scaf_61985-5.10	2593	-	K04437	filamin -1
3	1.22736e-38	1.30156	0.298	0.037	1.66356e-34	Fanmao	Bpl_scaf_35290-1.7	352	-	-	flocculation FLO10-like
1	5.30899e-60	1.40937	0.288	0.01	7.19581e-56	Fanmao	Bpl_scaf_36688-0.22	446	-	-	H5p, partial
7	2.69156e-16	1.45663	0.445	0.228	3.64814e-12	Fanmao	Bpl_scaf_63703-4.35	72	GO:0046872	-	MT22_MYTED ame: Full=Metallothionein 20-II Short=MT-20-II
5	1.01649e-21	1.41613	0.309	0.088	1.37775e-17	Fanmao	Bpl_scaf_22826-5.6	522	-	-	neuropilin and tolloid 2 isoform X1
8	2.82515e-14	1.26805	0.503	0.307	3.82921e-10	Fanmao	Bpl_scaf_48581-0.7	224	-	-	PREDICTED: uncharacterized protein LOC105328788 isoform X2
2	1.27843e-50	1.31541	0.251	0.01	1.73278e-46	Fanmao	Bpl_scaf_43051-0.3	233	-	-	PREDICTED: uncharacterized protein LOC105335571
15	0.000396029	0.664016	0.623	0.662	1	Fanmao	Bpl_scaf_46488-6.34	128	GO:0005840	K02975	ribosomal S25
4	1.24107e-32	4.279	0.419	0.112	1.68215e-28	Fanmao	Bpl_scaf_268-5.8	509	-	-	serine threonine- phosphatase 6 regulatory ankyrin repeat subunit B-like
10	6.20015e-12	1.10498	0.466	0.29	8.40369e-08	Fanmao	Bpl_scaf_22242-2.44	432	GO:0003924,GO:0005200,GO:0005525,GO:0005737,GO:0005874,GO:0007017,GO:0008152,GO:0021634,GO:0043066,GO:0051258	K07374	tubulin alpha-1A chain-like, partial
9	6.80659e-13	0.828118	0.859	0.828	9.22565e-09	Fanmao	Bpl_scaf_1371-2.4	1108	-	K06825	Zonadhesin
19	1.92317e-183	4.96369	0.856	0.024	2.60666e-179	Reconstitution	Bpl_scaf_55952-0.12	714	-	-	---NA---
20	2.68181e-80	1.80253	0.923	0.576	3.63492e-76	Reconstitution	Bpl_scaf_47525-1.6	531	-	-	---NA---
21	7.48712e-70	2.46149	0.564	0.108	1.0148e-65	Reconstitution	Bpl_scaf_43856-2.10	1475	-	-	---NA---
37	4.42779e-18	0.734461	0.564	0.354	6.00143e-14	Reconstitution	Bpl_scaf_25973-3.4	88	-	-	---NA---
39	4.12022e-17	0.777206	0.519	0.337	5.58455e-13	Reconstitution	Bpl_scaf_31681-1.10	209	-	-	---NA---
62	4.61845e-11	0.595576	0.598	0.474	6.25984e-07	Reconstitution	Bpl_scaf_6938-0.9	1133	-	-	---NA---
64	1.99596e-10	0.418942	0.494	0.35	2.70533e-06	Reconstitution	Bpl_scaf_9634-0.13	1173	-	-	---NA---
72	2.76576e-07	0.500983	0.286	0.16	0.00374872	Reconstitution	Bpl_scaf_59940-0.6	336	-	-	---NA---
43	5.77432e-16	0.929178	0.38	0.181	7.82652e-12	Reconstitution	Bpl_scaf_55333-2.10	1065	GO:0006629,GO:0007165,GO:0008081	K05858	1-phosphatidylinositol 4,5-bisphosphate phosphodiesterase beta-4-like, partial
36	1.09896e-20	1.01879	0.367	0.141	1.48953e-16	Reconstitution	Bpl_scaf_16935-0.17	266	-	-	A disintegrin and metallo ase with thrombospondin motifs gon-1-like
38	1.37056e-17	0.532447	0.316	0.115	1.85766e-13	Reconstitution	Bpl_scaf_59648-1.6	567	GO:0005509,GO:0005544,GO:0012505,GO:0016020,GO:0031982,GO:0043231,GO:0044444,GO:0044446,GO:0044763,GO:0050819,GO:0065008	K17095	annexin B9-like isoform X2
46	7.58042e-15	0.543507	0.641	0.413	1.02745e-10	Reconstitution	Bpl_scaf_4833-2.22	958	-	K12875	apoptotic chromatin condensation inducer in the nucleus-like
35	1.6251e-21	0.755455	0.373	0.144	2.20267e-17	Reconstitution	Bpl_scaf_55705-3.9	402	GO:0044464,GO:0048522	K00476	aspartyl asparaginyl beta-hydroxylase-like
22	1.87789e-69	1.54398	0.564	0.108	2.5453e-65	Reconstitution	Bpl_scaf_33596-7.3	258	-	-	carbonic anhydrase 1-like
27	3.08336e-36	1.08492	0.535	0.209	4.17919e-32	Reconstitution	Bpl_scaf_48274-0.3	257	-	K01672	carbonic anhydrase 1-like
28	2.68038e-34	1.16379	0.828	0.536	3.63298e-30	Reconstitution	Bpl_scaf_6901-7.5	2075	-	K00698	Chitin synthase 1
67	4.1564e-09	0.629902	0.331	0.184	5.63359e-05	Reconstitution	Bpl_scaf_19571-0.5	444	-	-	deleted in malignant brain tumors 1 -like
23	2.4144e-50	1.69127	0.341	0.015	3.27248e-46	Reconstitution	Bpl_scaf_21899-0.25	78	-	-	disintegrin and metallo ase domain-containing 10-like isoform X1
61	2.51828e-11	0.584947	0.348	0.184	3.41328e-07	Reconstitution	Bpl_scaf_44427-3.9	1326	GO:0009987,GO:0016740,GO:0050896	K03515	DNA repair REV1 isoform X1
65	2.75151e-10	0.506778	0.289	0.147	3.7294e-06	Reconstitution	Bpl_scaf_64229-1.6	886	-	-	ecotropic viral integration site 5 ortholog-like isoform X1
45	1.77759e-15	0.540553	0.372	0.172	2.40935e-11	Reconstitution	Bpl_scaf_46270-3.13	1536	-	K03260	eukaryotic translation initiation factor 4 gamma 1-like isoform X3
68	1.57991e-08	0.431728	0.366	0.223	0.000214141	Reconstitution	Bpl_scaf_16621-2.3	453	-	K15616	eyes absent homolog 1-like isoform X14
33	2.2896e-26	0.865084	0.452	0.181	3.10333e-22	Reconstitution	Bpl_scaf_61662-2.9	348	GO:0008270,GO:0016491,GO:0055114	-	geraniol dehydrogenase 1-like isoform X2
48	3.39039e-14	0.50785	0.27	0.104	4.59533e-10	Reconstitution	Bpl_scaf_26757-3.20	360	GO:0004356,GO:0005524,GO:0006542	K01915	Glutamine synthetase
29	8.74984e-30	1.083	0.417	0.141	1.18595e-25	Reconstitution	Bpl_scaf_1-0.2	477	-	-	heat shock 70 kDa 12A-like
32	7.01111e-27	0.768578	0.299	0.065	9.50286e-23	Reconstitution	Bpl_scaf_21173-5.3	299	GO:0006839,GO:0016021,GO:0031966,GO:0055085	K15106	kidney mitochondrial carrier 1-like
54	1.09448e-12	0.597475	0.557	0.353	1.48345e-08	Reconstitution	Bpl_scaf_60908-4.14	1782	GO:0005488,GO:0006464,GO:0016301,GO:0016310,GO:0050794	-	mitogen-activated kinase kinase kinase 14-like
70	9.49772e-08	0.42948	0.471	0.327	0.00128732	Reconstitution	Bpl_scaf_57007-3.16	1835	-	K18261	myoferlin-like isoform X5
41	2.94946e-16	0.524154	0.267	0.091	3.9977e-12	Reconstitution	Bpl_scaf_48489-0.7	295	GO:0043167	-	NAD-dependent lipoamidase sirtuin-4, mitochondrial
34	5.71529e-26	0.926901	0.348	0.102	7.74651e-22	Reconstitution	Bpl_scaf_16489-0.6	497	-	-	neural-cadherin 2
26	1.27621e-41	1.11221	0.281	0.011	1.72978e-37	Reconstitution	Bpl_scaf_31620-0.32	609	-	-	neural-cadherin-like isoform X1
58	1.34755e-11	0.550033	0.417	0.239	1.82647e-07	Reconstitution	Bpl_scaf_59490-0.7	1815	-	-	neurobeachin-like isoform X4
56	7.83812e-12	0.486831	0.278	0.123	1.06238e-07	Reconstitution	Bpl_scaf_1368-0.3	153	GO:0000154,GO:0030515,GO:0031428,GO:0032040	-	Nucleolar 58
51	2.42777e-13	0.576541	0.443	0.254	3.29061e-09	Reconstitution	Bpl_scaf_53568-2.6	1117	GO:0000413,GO:0003755,GO:0006457	K09566	peptidyl-prolyl cis-trans isomerase G-like
71	1.14894e-07	0.41729	0.286	0.162	0.00155727	Reconstitution	Bpl_scaf_38703-8.10	1844	-	K16537	pericentriolar material 1 -like
53	5.74917e-13	0.769723	0.395	0.207	7.79243e-09	Reconstitution	Bpl_scaf_60262-0.0	233	-	-	PREDICTED: uncharacterized protein LOC105321561
24	1.5701e-46	1.80837	0.316	0.016	2.12811e-42	Reconstitution	Bpl_scaf_62409-0.16	935	GO:0005488	-	PREDICTED: uncharacterized protein LOC105333786 isoform X2
52	3.35797e-13	0.544735	0.499	0.309	4.55139e-09	Reconstitution	Bpl_scaf_63348-10.10	700	GO:0003676,GO:0004386,GO:0005524,GO:0008152	K12823	probable ATP-dependent RNA helicase DDX5 isoform X1
59	1.58742e-11	0.425841	0.289	0.131	2.15159e-07	Reconstitution	Bpl_scaf_47325-1.19	1332	-	K11647	probable global transcription activator SNF2L2 isoform X1
69	2.60166e-08	0.414803	0.308	0.173	0.000352629	Reconstitution	Bpl_scaf_64005-13.12	3815	-	K04550	prolow-density lipo receptor-related 1
42	3.05193e-16	0.579269	0.65	0.414	4.13659e-12	Reconstitution	Bpl_scaf_64387-2.10	1012	-	K14000	ribosome-binding 1-like isoform X5
49	6.61946e-14	0.530611	0.465	0.264	8.97201e-10	Reconstitution	Bpl_scaf_53773-4.12	542	-	K13098	RNA-binding FUS-like isoform X4
55	1.47108e-12	0.586582	0.289	0.128	1.9939e-08	Reconstitution	Bpl_scaf_41724-1.2	484	-	-	RNA-directed DNA polymerase from transposon BS
66	5.39495e-10	0.528549	0.389	0.235	7.31231e-06	Reconstitution	Bpl_scaf_22362-6.9	2026	GO:0035253,GO:0051297	K16469	rootletin-like isoform X7
50	2.29387e-13	0.777022	0.847	0.752	3.10911e-09	Reconstitution	Bpl_scaf_27638-4.18	2522	-	-	SCO-spondin-like, partial
47	1.84001e-14	0.532854	0.548	0.327	2.49395e-10	Reconstitution	Bpl_scaf_24012-4.8	936	GO:0005634,GO:0006397,GO:0008380	K13171	serine arginine repetitive matrix 1-like isoform X1
25	1.94986e-46	2.19589	0.487	0.126	2.64284e-42	Reconstitution	Bpl_scaf_40880-0.16	482	-	-	serine threonine- phosphatase 6 regulatory ankyrin repeat subunit B-like isoform X1
44	1.22878e-15	0.579342	0.426	0.215	1.66549e-11	Reconstitution	Bpl_scaf_57017-0.4	1446	GO:0005391,GO:0005524,GO:0006813,GO:0008152,GO:0016021,GO:0035725,GO:0046872	K01539	sodium potassium-transporting ATPase subunit alpha-like
30	2.20892e-29	0.946903	0.49	0.188	2.99397e-25	Reconstitution	Bpl_scaf_13642-5.8	654	GO:0005328,GO:0006836,GO:0016021,GO:0051536,GO:0055085	K05038	sodium- and chloride-dependent glycine transporter 1-like
40	6.39877e-17	0.652229	0.319	0.125	8.67289e-13	Reconstitution	Bpl_scaf_33543-0.10	386	-	K07984	src kinase-associated phospho 1-like
60	2.40263e-11	0.45483	0.255	0.108	3.25653e-07	Reconstitution	Bpl_scaf_29450-1.2	237	GO:0003700,GO:0003707,GO:0005496,GO:0005634,GO:0006351,GO:0006355,GO:0008270,GO:0043401,GO:0043565	K08554	steroid hormone receptor ERR2-like isoform X1
57	1.33514e-11	0.580133	0.601	0.393	1.80966e-07	Reconstitution	Bpl_scaf_58954-2.7	184	GO:0044765	-	Transient receptor potential cation channel subfamily M member 3
63	1.15443e-10	0.43609	0.287	0.138	1.56472e-06	Reconstitution	Bpl_scaf_56926-1.12	773	GO:0044699	-	very low-density lipo receptor isoform X3
31	6.85427e-29	1.10511	0.448	0.17	9.29027e-25	Reconstitution	Bpl_scaf_48945-0.2	306	-	-	zinc finger MYM-type 4-like
73	1.1337e-136	3.04203	0.787	0.155	1.53661e-132	Starvation	Bpl_scaf_22849-1.5	139	-	-	---NA---
86	6.20446e-25	0.981221	0.328	0.1	8.40953e-21	Starvation	Bpl_scaf_36437-0.3	51	-	-	---NA---
87	6.8939e-25	1.23214	0.415	0.163	9.34399e-21	Starvation	Bpl_scaf_43116-1.54	391	-	-	---NA---
88	3.07032e-24	0.786908	0.372	0.136	4.16151e-20	Starvation	Bpl_scaf_10745-0.1	551	-	-	---NA---
91	3.22849e-20	0.98849	0.752	0.584	4.3759e-16	Starvation	Bpl_scaf_58053-0.13	62	-	-	---NA---
92	1.72424e-19	0.710329	0.3	0.105	2.33703e-15	Starvation	Bpl_scaf_2518-0.1	54	-	-	---NA---
95	1.79157e-14	0.965936	0.541	0.347	2.42829e-10	Starvation	Bpl_scaf_63069-1.25	363	-	-	---NA---
102	2.51283e-08	0.433032	0.838	0.786	0.000340588	Starvation	Bpl_scaf_3530-9.35	1755	-	-	---NA---
78	3.46584e-50	1.45579	0.415	0.078	4.6976e-46	Starvation	Bpl_scaf_20338-0.1	110	-	-	, partial
103	4.54873e-08	0.465757	0.782	0.652	0.000616535	Starvation	Bpl_scaf_56354-8.14	137	GO:0003735,GO:0005840,GO:0006412	K02976	40S ribosomal S26
105	4.81246e-07	0.420319	0.386	0.259	0.00652281	Starvation	Bpl_scaf_45479-0.6	92	GO:0003735,GO:0005840,GO:0006412,GO:0046872	K02921	60S ribosomal L37a
108	0.000290301	0.454676	0.295	0.206	1	Starvation	Bpl_scaf_158-0.9	205	-	-	C-type lectin 9
93	1.36027e-18	0.99409	0.349	0.147	1.84371e-14	Starvation	Bpl_scaf_25165-3.8	283	-	-	caspase
75	4.22723e-82	1.80132	0.6	0.113	5.72958e-78	Starvation	Bpl_scaf_62453-0.8	70	-	-	conserved hypothetical protein, fragment
100	4.077e-09	0.576136	0.576	0.454	5.52597e-05	Starvation	Bpl_scaf_31501-17.32	526	GO:0003677,GO:0006355	K09048	cyclic AMP-responsive element-binding 3 2 isoform X1
94	9.54738e-15	0.771168	0.424	0.227	1.29405e-10	Starvation	Bpl_scaf_41576-4.15	345	GO:0046872	-	cysteine and histidine-rich 1-like
85	1.77435e-25	1.35406	0.293	0.08	2.40496e-21	Starvation	Bpl_scaf_52188-1.15	414	GO:0016020	-	deleted in malignant brain tumors 1 -like
84	4.48434e-28	2.51722	0.412	0.157	6.07808e-24	Starvation	Bpl_scaf_17778-1.17	4627	GO:0003777,GO:0003779,GO:0005524,GO:0007018,GO:0016301,GO:0016310,GO:0016887,GO:0030286	K10408	dynein heavy chain 10, axonemal-like isoform X1
98	2.03145e-12	0.56061	0.834	0.701	2.75343e-08	Starvation	Bpl_scaf_43962-2.9	461	GO:0003746,GO:0003924,GO:0005525,GO:0005737,GO:0006414	K03231	elongation factor 1 alpha
80	9.34433e-39	2.07317	0.511	0.19	1.26653e-34	Starvation	Bpl_scaf_45750-0.6	509	GO:0000922,GO:0005815,GO:0007020	K16570	gamma-tubulin complex component 3 homolog
96	9.01e-13	0.457662	0.571	0.38	1.22121e-08	Starvation	Bpl_scaf_33596-10.18	2380	-	-	golgin subfamily B member 1-like isoform X3
89	2.00311e-23	0.950997	0.372	0.14	2.71501e-19	Starvation	Bpl_scaf_63539-1.16	154	-	-	hypothetical protein NEMVEDRAFT_v1g248679
90	5.737e-23	1.14884	0.272	0.074	7.77594e-19	Starvation	Bpl_scaf_190-0.4	150	-	-	MAM and LDL-receptor class A domain-containing 2-like
106	3.74883e-05	0.450452	0.473	0.366	0.508116	Starvation	Bpl_scaf_35727-1.14	1566	-	-	myosin-10-like isoform X17
83	1.26124e-29	0.875608	0.295	0.071	1.70949e-25	Starvation	Bpl_scaf_24479-1.4	266	-	-	NMDA receptor synaptonuclear signaling and neuronal migration factor-like isoform X2
97	1.80442e-12	0.952541	0.597	0.468	2.44571e-08	Starvation	Bpl_scaf_6090-3.8	220	GO:0000413,GO:0003755,GO:0006457	K03768	peptidyl-prolyl cis-trans isomerase-like
109	0.00188141	0.418257	0.309	0.237	1	Starvation	Bpl_scaf_5295-1.6	571	-	-	poly [ADP-ribose] polymerase 14-like
74	3.21375e-85	1.58754	0.384	0	4.35592e-81	Starvation	Bpl_scaf_8718-1.6	381	GO:0000139,GO:0006486,GO:0016021,GO:0016757,GO:0030246,GO:0046872	-	polypeptide N-acetylgalactosaminyltransferase 10
81	2.24933e-32	1.77546	0.59	0.299	3.04874e-28	Starvation	Bpl_scaf_19166-1.14	405	-	-	PREDICTED: uncharacterized protein LOC105328034
76	7.40873e-68	1.00571	0.311	0	1.00418e-63	Starvation	Bpl_scaf_53107-1.19	315	GO:0016705,GO:0051213	K00472	Prolyl 4-hydroxylase subunit alpha-1
79	9.38821e-42	0.954042	0.293	0.035	1.27248e-37	Starvation	Bpl_scaf_22849-0.1	452	-	-	RNA-directed DNA polymerase from mobile element jockey-like
101	6.00506e-09	0.438233	0.728	0.59	8.13926e-05	Starvation	Bpl_scaf_63617-2.38	1024	-	-	scaffold attachment factor B2-like isoform X1
107	6.48895e-05	0.605313	0.588	0.497	0.879512	Starvation	Bpl_scaf_61993-0.4	291	-	-	sushi, von Willebrand factor type A, EGF and pentraxin domain-containing 1 isoform X1
104	1.91837e-07	0.546472	0.309	0.195	0.00260016	Starvation	Bpl_scaf_2733-0.6	437	-	-	sushi, von Willebrand factor type A, EGF and pentraxin domain-containing 1-like
77	2.70014e-61	3.72287	0.283	0	3.65977e-57	Starvation	Bpl_scaf_18337-0.5	298	-	-	Tripartite motif-containing 45
82	4.11409e-31	1.17533	0.492	0.198	5.57624e-27	Starvation	Bpl_scaf_27182-0.8	806	GO:0016043	K08017	villin-1-like isoform X3
99	6.68095e-11	0.592608	0.883	0.808	9.05536e-07	Starvation	Bpl_scaf_1371-2.4	1108	-	K06825	Zonadhesin

## Sheet: Supplementary File 1i
Supplementary File 1i. Cell cluster specific Differentially expressed genes among the three deep-sea in situ treatments treatments, the Mucus cell.
	p_val	avg_log2FC	pct.1	pct.2	p_val_adj	cluster	gene	Prot_Length	GO_ID	KEGG_ko	Description
1	5.68882e-133	1.69398	0.542	0.013	7.71062e-129	Fanmao	Bpl_scaf_43051-0.3	233	-	-	PREDICTED: uncharacterized protein LOC105335571
2	6.09087e-129	1.31892	0.393	0	8.25556e-125	Fanmao	Bpl_scaf_2706-0.6	199	-	-	C1q domain containing 1q51
3	3.84798e-81	0.887207	0.355	0.01	5.21556e-77	Fanmao	Bpl_scaf_17051-13.8	206	-	K04097	glutathione S-transferase sigma 3
4	6.16608e-62	1.58604	0.561	0.071	8.35751e-58	Fanmao	Bpl_scaf_54651-5.17	193	GO:0005515	-	PREDICTED: myophilin-like
5	1.3563e-58	1.50198	0.495	0.056	1.83833e-54	Fanmao	Bpl_scaf_14002-1.10	209	-	-	baculoviral IAP repeat-containing 7-A-like
6	6.85361e-55	1.68242	0.505	0.065	9.28938e-51	Fanmao	Bpl_scaf_35290-1.7	352	-	-	flocculation FLO10-like
7	3.95803e-53	1.90782	0.748	0.19	5.36471e-49	Fanmao	Bpl_scaf_57259-5.3	629	-	-	cytoplasmic intermediate filament A
8	6.69648e-53	1.38559	0.467	0.054	9.07641e-49	Fanmao	Bpl_scaf_31664-2.6	131	-	-	---NA---
9	5.56105e-51	0.840233	0.252	0.01	7.53745e-47	Fanmao	Bpl_scaf_16982-0.25	193	-	K06468	galactose-specific lectin nattectin
10	6.87048e-50	0.880224	0.327	0.023	9.31225e-46	Fanmao	Bpl_scaf_46524-0.9	608	-	-	zinc metallo ase nas-15-like
11	9.47099e-49	2.21512	0.374	0.035	1.2837e-44	Fanmao	Bpl_scaf_63703-4.15	667	-	-	Inhibitor of apoptosis
12	3.63349e-45	1.46482	0.505	0.081	4.92483e-41	Fanmao	Bpl_scaf_61985-5.10	2593	-	K04437	filamin -1
13	2.81495e-40	0.869403	0.28	0.022	3.81538e-36	Fanmao	Bpl_scaf_22947-2.14	288	GO:0003824,GO:0005739,GO:0006464,GO:0043167,GO:0044710,GO:0044763,GO:0050794,GO:0080090	K11414	NAD-dependent deacetylase sirtuin-4-like
14	3.09483e-29	1.14157	0.449	0.102	4.19474e-25	Fanmao	Bpl_scaf_36688-0.22	446	-	-	H5p, partial
15	7.85516e-21	0.796721	0.28	0.051	1.06469e-16	Fanmao	Bpl_scaf_22631-2.16	483	-	K07763	Matrix metallo ase-19
16	2.12821e-20	1.09412	0.439	0.135	2.88457e-16	Fanmao	Bpl_scaf_9415-5.18	216	-	-	---NA---
17	2.15102e-16	1.39704	0.748	0.46	2.91549e-12	Fanmao	Bpl_scaf_48581-0.7	224	-	-	PREDICTED: uncharacterized protein LOC105328788 isoform X2
18	3.74922e-15	0.728759	0.383	0.119	5.0817e-11	Fanmao	Bpl_scaf_64398-0.3	115	-	-	---NA---
19	7.10241e-14	3.17686	0.346	0.115	9.62661e-10	Fanmao	Bpl_scaf_268-5.8	509	-	-	serine threonine- phosphatase 6 regulatory ankyrin repeat subunit B-like
20	2.17523e-13	1.21221	0.785	0.599	2.9483e-09	Fanmao	Bpl_scaf_63703-4.35	72	GO:0046872	-	MT22_MYTED ame: Full=Metallothionein 20-II Short=MT-20-II
21	7.41799e-13	0.803125	0.374	0.13	1.00543e-08	Fanmao	Bpl_scaf_61711-1.12	442	-	-	inhibitor of apoptosis
22	8.20759e-12	0.919048	0.523	0.251	1.11246e-07	Fanmao	Bpl_scaf_14002-3.3	366	GO:0004054,GO:0005524,GO:0016310	K00933	arginine kinase
23	1.45001e-11	0.721615	0.402	0.168	1.96534e-07	Fanmao	Bpl_scaf_25704-0.7	256	-	-	Fibrinogen C domain-containing 1
24	6.62782e-11	0.841996	0.71	0.449	8.98335e-07	Fanmao	Bpl_scaf_63703-4.30	110	GO:0005758,GO:0006122,GO:0006123,GO:0009055,GO:0020037,GO:0043280,GO:0046872,GO:0070469	K08738	cytochrome c
25	2.44657e-10	0.964728	0.579	0.349	3.31608e-06	Fanmao	Bpl_scaf_24592-4.10	500	GO:0003743,GO:0004386,GO:0005524,GO:0006413	K03257	eukaryotic initiation factor 4A-I-like
26	4.12589e-10	0.879222	0.766	0.579	5.59224e-06	Fanmao	Bpl_scaf_22242-2.44	432	GO:0003924,GO:0005200,GO:0005525,GO:0005737,GO:0005874,GO:0007017,GO:0008152,GO:0021634,GO:0043066,GO:0051258	K07374	tubulin alpha-1A chain-like, partial
27	1.37831e-09	0.766691	0.327	0.127	1.86816e-05	Fanmao	Bpl_scaf_43245-0.1	2198	-	-	PREDICTED: uncharacterized protein LOC105321680 isoform X12
28	1.61664e-09	0.855273	0.776	0.704	2.1912e-05	Fanmao	Bpl_scaf_13236-2.10	263	GO:0004322,GO:0005623,GO:0006826,GO:0006879,GO:0008199,GO:0055114	K00522	Soma ferritin
29	4.35428e-09	0.821551	0.523	0.294	5.90179e-05	Fanmao	Bpl_scaf_22089-0.17	392	GO:0016021	K16336	syndecan-like isoform X1
30	6.49908e-09	0.667128	0.271	0.096	8.80885e-05	Fanmao	Bpl_scaf_7318-2.19	185	-	-	mesencephalic astrocyte-derived neurotrophic factor homolog
31	1.10347e-08	0.836869	0.477	0.28	0.000149564	Fanmao	Bpl_scaf_56025-0.28	263	-	-	fibrinogen C domain-containing 1-like isoform X3
32	1.35019e-08	0.606818	0.299	0.115	0.000183005	Fanmao	Bpl_scaf_29375-1.23	184	-	-	---NA---
33	1.32411e-07	0.445802	0.29	0.113	0.0017947	Fanmao	Bpl_scaf_18519-1.3	142	-	-	Fibrinogen C domain-containing 1
34	4.30303e-07	1.29497	0.43	0.231	0.00583233	Fanmao	Bpl_scaf_59360-0.26	105	-	-	---NA---
35	1.07246e-06	0.656484	0.654	0.523	0.0145362	Fanmao	Bpl_scaf_53693-1.19	213	-	-	fungistatic metabolite
36	1.9745e-06	0.625947	0.393	0.211	0.0267624	Fanmao	Bpl_scaf_30366-1.6	517	-	K14564	nucleolar 56
37	2.33729e-06	0.561561	0.458	0.259	0.0316796	Fanmao	Bpl_scaf_3530-9.35	1755	-	-	---NA---
38	3.82838e-06	0.585835	0.561	0.369	0.0518899	Fanmao	Bpl_scaf_48777-1.5	504	GO:0003676,GO:0046872	K09206	Krueppel-like factor 5
39	4.15996e-06	0.501407	0.336	0.17	0.0563841	Fanmao	Bpl_scaf_25667-1.22	169	GO:0005509	K12757	Myosin regulatory light chain sqh
40	4.29715e-06	0.488469	0.308	0.147	0.0582435	Fanmao	Bpl_scaf_64798-1.11	556	GO:0030246	-	galectin-4-like isoform X1
41	5.58567e-06	0.639481	0.355	0.193	0.0757082	Fanmao	Bpl_scaf_56904-8.14	256	-	-	RNA-binding lark-like isoform X1
42	5.6443e-06	0.549752	0.271	0.125	0.0765028	Fanmao	Bpl_scaf_2581-2.10	1052	GO:0006355,GO:0007379,GO:0008023,GO:0009952,GO:0070062,GO:0090090,GO:2000096	K15187	AF-9 isoform X2
43	1.25517e-05	0.614752	0.757	0.68	0.170126	Fanmao	Bpl_scaf_30366-9.12	150	GO:0003723,GO:0003735,GO:0006412,GO:0015935	K02958	40S ribosomal S15
44	1.93662e-05	0.462151	0.252	0.116	0.262489	Fanmao	Bpl_scaf_44217-5.15	451	GO:0003924,GO:0005200,GO:0005525,GO:0005737,GO:0005874,GO:0007017,GO:0008152,GO:0051258	K07374	tubulin alpha-1A chain
45	6.94162e-05	0.546584	0.299	0.152	0.940868	Fanmao	Bpl_scaf_57079-1.12	1502	GO:0000166	K09486	hypoxia up-regulated 1-like
46	0.000100855	0.481714	0.299	0.163	1	Fanmao	Bpl_scaf_3127-1.12	225	-	K10436	microtubule-associated RP EB family member 3-like isoform X2
47	0.000162606	0.542901	0.271	0.145	1	Fanmao	Bpl_scaf_24781-5.29	311	GO:0008469,GO:0034969	K11434	arginine N-methyltransferase 1-like
48	0.00017101	0.453805	0.327	0.185	1	Fanmao	Bpl_scaf_6533-0.14	903	GO:0006139	K12619	5 -3 exoribonuclease 2
49	0.000184763	0.550494	0.271	0.145	1	Fanmao	Bpl_scaf_702-0.7	89	GO:0003924,GO:0005525,GO:0005811,GO:0005829,GO:0005886,GO:0005911,GO:0008152,GO:0008283,GO:0019003,GO:0030033,GO:0030168,GO:0032403,GO:0032486,GO:0045121,GO:0045955,GO:0061028,GO:0070062,GO:0070374,GO:0071320,GO:1901888,GO:2000114,GO:2000301	-	ras-related Rap-1b isoform X4
50	0.000197511	0.496669	0.785	0.7	1	Fanmao	Bpl_scaf_16646-2.15	511	GO:0003676,GO:0043227,GO:0043229	K11294	nucleolin-like isoform X2
51	0.000222679	0.461731	0.29	0.16	1	Fanmao	Bpl_scaf_8163-0.13	160	-	-	PREDICTED: uncharacterized protein LOC105337979 isoform X1
52	0.000265664	0.571055	0.43	0.331	1	Fanmao	Bpl_scaf_61552-4.15	2754	-	K04958	inositol 1,4,5-trisphosphate receptor type 2-like isoform X1
53	0.000405732	0.422375	0.757	0.655	1	Fanmao	Bpl_scaf_53568-3.4	69	GO:0000022,GO:0005840,GO:0017022,GO:0022008	K02894	60S ribosomal L23
54	0.000456213	0.493593	0.364	0.228	1	Fanmao	Bpl_scaf_57223-4.40	269	GO:0005525,GO:0005622,GO:0005886,GO:0007264	K04513	Ras-like GTP-binding Rho1
55	0.000543852	0.420299	0.262	0.145	1	Fanmao	Bpl_scaf_59648-5.10	1391	-	K10369	Supervillin
56	0.00180029	0.41262	0.421	0.281	1	Fanmao	Bpl_scaf_49759-5.9	494	GO:0001948,GO:0005524,GO:0005788,GO:0005793,GO:0005886,GO:0005925,GO:0006983,GO:0006987,GO:0008180,GO:0009986,GO:0016491,GO:0019904,GO:0021589,GO:0021680,GO:0021762,GO:0030176,GO:0030335,GO:0030496,GO:0030512,GO:0031398,GO:0031625,GO:0034663,GO:0035437,GO:0042149,GO:0043022,GO:0043066,GO:0043209,GO:0051603,GO:0051787,GO:0070062,GO:0071353,GO:1901998	-	78 kDa glucose-regulated
57	0.00270765	0.43848	0.402	0.289	1	Fanmao	Bpl_scaf_63657-2.1	303	GO:0019904	K06630	14-3-3 epsilon
58	0.00293114	0.476838	0.71	0.644	1	Fanmao	Bpl_scaf_32549-2.1	305	GO:0003723,GO:0003735,GO:0006412,GO:0015935	K02989	40S ribosomal S5
59	0.00330496	0.442404	0.486	0.374	1	Fanmao	Bpl_scaf_31119-4.18	162	-	-	perlucin 6
60	0.00631407	0.428073	0.701	0.631	1	Fanmao	Bpl_scaf_21209-0.8	376	GO:0000281,GO:0005524,GO:0005884,GO:0005938,GO:0007126,GO:0009790,GO:0016887,GO:0030036,GO:0040011	K05692	actin, cytoplasmic
61	0.00680687	0.479993	0.29	0.197	1	Fanmao	Bpl_scaf_64300-3.5	405	GO:0016020,GO:0016740	K13516	lysophospholipid acyltransferase 7-like
62	1.60633e-217	4.35586	0.799	0.02	2.17722e-213	Reconstitution	Bpl_scaf_55952-0.12	714	-	-	---NA---
63	3.34739e-111	2.1168	0.702	0.173	4.53705e-107	Reconstitution	Bpl_scaf_43856-2.10	1475	-	-	---NA---
64	1.93985e-104	2.97678	0.924	0.577	2.62927e-100	Reconstitution	Bpl_scaf_16935-0.17	266	-	-	A disintegrin and metallo ase with thrombospondin motifs gon-1-like
65	2.11955e-82	1.56928	0.715	0.288	2.87284e-78	Reconstitution	Bpl_scaf_33596-7.3	258	-	-	carbonic anhydrase 1-like
66	2.4585e-68	0.961062	0.31	0.007	3.33225e-64	Reconstitution	Bpl_scaf_21960-6.20	175	-	-	C1q domain containing 1q84
67	1.47575e-59	0.927376	0.336	0.033	2.00024e-55	Reconstitution	Bpl_scaf_31289-4.11	115	-	-	Complement C1q 4
68	4.17999e-57	1.38973	0.643	0.296	5.66556e-53	Reconstitution	Bpl_scaf_48945-0.2	306	-	-	zinc finger MYM-type 4-like
69	4.07847e-56	1.57076	0.572	0.222	5.52796e-52	Reconstitution	Bpl_scaf_24329-1.12	164	-	-	C-type lectin domain family 17, member A isoform X2
70	2.06412e-50	1.23303	0.299	0.034	2.7977e-46	Reconstitution	Bpl_scaf_62409-0.16	935	GO:0005488	-	PREDICTED: uncharacterized protein LOC105333786 isoform X2
71	4.54272e-49	0.741205	0.304	0.037	6.1572e-45	Reconstitution	Bpl_scaf_15282-3.10	493	GO:0008168,GO:0032259	K05929	phosphoethanolamine N-methyltransferase 3-like isoform X3
72	4.03975e-47	1.35476	0.282	0.03	5.47548e-43	Reconstitution	Bpl_scaf_32311-1.19	93	-	-	solute carrier family 23 member 1-like
73	3.1347e-45	1.43888	0.802	0.551	4.24878e-41	Reconstitution	Bpl_scaf_47525-1.6	531	-	-	---NA---
74	1.31429e-44	1.37027	0.355	0.078	1.78138e-40	Reconstitution	Bpl_scaf_40880-0.16	482	-	-	serine threonine- phosphatase 6 regulatory ankyrin repeat subunit B-like isoform X1
75	3.0457e-44	1.20554	0.623	0.326	4.12814e-40	Reconstitution	Bpl_scaf_48274-0.3	257	-	K01672	carbonic anhydrase 1-like
76	6.01286e-42	0.738258	0.332	0.069	8.14983e-38	Reconstitution	Bpl_scaf_62441-3.7	198	-	K17725	persulfide dioxygenase ETHE1, mitochondrial-like isoform X1
77	2.28803e-41	0.878014	0.469	0.165	3.1012e-37	Reconstitution	Bpl_scaf_49759-5.9	494	GO:0001948,GO:0005524,GO:0005788,GO:0005793,GO:0005886,GO:0005925,GO:0006983,GO:0006987,GO:0008180,GO:0009986,GO:0016491,GO:0019904,GO:0021589,GO:0021680,GO:0021762,GO:0030176,GO:0030335,GO:0030496,GO:0030512,GO:0031398,GO:0031625,GO:0034663,GO:0035437,GO:0042149,GO:0043022,GO:0043066,GO:0043209,GO:0051603,GO:0051787,GO:0070062,GO:0071353,GO:1901998	-	78 kDa glucose-regulated
78	6.53924e-41	0.701334	0.283	0.044	8.86329e-37	Reconstitution	Bpl_scaf_26757-3.8	575	GO:0004414,GO:0005737,GO:0009086	K00641	probable serine-O-acetyltransferase cys2
79	9.20528e-40	0.66645	0.31	0.062	1.24768e-35	Reconstitution	Bpl_scaf_15800-0.5	367	GO:0004648,GO:0005737,GO:0006564,GO:0070062	K00831	Phosphoserine aminotransferase
80	1.8084e-32	0.673157	0.425	0.159	2.4511e-28	Reconstitution	Bpl_scaf_46270-3.13	1536	-	K03260	eukaryotic translation initiation factor 4 gamma 1-like isoform X3
81	2.71194e-32	0.66454	0.371	0.124	3.67576e-28	Reconstitution	Bpl_scaf_29450-1.2	237	GO:0003700,GO:0003707,GO:0005496,GO:0005634,GO:0006351,GO:0006355,GO:0008270,GO:0043401,GO:0043565	K08554	steroid hormone receptor ERR2-like isoform X1
82	2.02181e-30	1.04835	0.843	0.64	2.74036e-26	Reconstitution	Bpl_scaf_6901-7.5	2075	-	K00698	Chitin synthase 1
83	6.77831e-28	0.759814	0.738	0.529	9.18732e-24	Reconstitution	Bpl_scaf_64340-0.2	415	GO:0005509,GO:0005783,GO:0006457,GO:0051082	K08057	calreticulin
84	6.17327e-26	0.717591	0.361	0.136	8.36725e-22	Reconstitution	Bpl_scaf_1-0.2	477	-	-	heat shock 70 kDa 12A-like
85	6.5399e-26	0.511328	0.257	0.067	8.86418e-22	Reconstitution	Bpl_scaf_1866-2.25	533	GO:0016616,GO:0044710	K00058	D-3-phosphoglycerate dehydrogenase-like
86	7.2094e-26	0.72512	0.597	0.367	9.77162e-22	Reconstitution	Bpl_scaf_61662-2.9	348	GO:0008270,GO:0016491,GO:0055114	-	geraniol dehydrogenase 1-like isoform X2
87	4.80026e-25	0.551075	0.346	0.128	6.50627e-21	Reconstitution	Bpl_scaf_59648-12.37	657	GO:0005488	K09487	glucose-regulated 94
88	1.08038e-24	0.552647	0.354	0.136	1.46435e-20	Reconstitution	Bpl_scaf_48489-0.7	295	GO:0043167	-	NAD-dependent lipoamidase sirtuin-4, mitochondrial
89	1.38801e-24	0.639836	0.478	0.244	1.8813e-20	Reconstitution	Bpl_scaf_26757-3.20	360	GO:0004356,GO:0005524,GO:0006542	K01915	Glutamine synthetase
90	4.07945e-24	0.490858	0.274	0.083	5.52929e-20	Reconstitution	Bpl_scaf_57079-1.12	1502	GO:0000166	K09486	hypoxia up-regulated 1-like
91	3.7497e-23	0.621708	0.667	0.437	5.08234e-19	Reconstitution	Bpl_scaf_58896-4.11	2052	-	K11643	chromodomain-helicase-DNA-binding 4-like isoform X3
92	6.02941e-23	0.774412	0.545	0.311	8.17227e-19	Reconstitution	Bpl_scaf_32300-1.15	652	-	-	baculoviral IAP repeat-containing 7-B-like
93	6.77696e-23	0.468296	0.268	0.083	9.18549e-19	Reconstitution	Bpl_scaf_36179-1.3	447	GO:0005743,GO:0070224	K17218	Sulfide:quinone oxidoreductase, mitochondrial
94	1.97508e-22	0.935523	0.486	0.263	2.67702e-18	Reconstitution	Bpl_scaf_58954-2.7	184	GO:0044765	-	Transient receptor potential cation channel subfamily M member 3
95	1.43561e-21	0.569784	0.495	0.266	1.94583e-17	Reconstitution	Bpl_scaf_24012-4.8	936	GO:0005634,GO:0006397,GO:0008380	K13171	serine arginine repetitive matrix 1-like isoform X1
96	2.40339e-21	0.659278	0.562	0.353	3.25756e-17	Reconstitution	Bpl_scaf_57017-0.4	1446	GO:0005391,GO:0005524,GO:0006813,GO:0008152,GO:0016021,GO:0035725,GO:0046872	K01539	sodium potassium-transporting ATPase subunit alpha-like
97	3.04738e-21	0.637426	0.522	0.304	4.13041e-17	Reconstitution	Bpl_scaf_34764-3.19	728	-	K11294	nucleolin-like isoform X1
98	1.09532e-20	0.477986	0.277	0.101	1.4846e-16	Reconstitution	Bpl_scaf_35916-0.6	435	GO:0006629,GO:0016021,GO:0016491,GO:0055114	K10226	fatty acid desaturase 1-like isoform X1
99	1.13047e-18	0.679835	0.539	0.35	1.53223e-14	Reconstitution	Bpl_scaf_45124-0.16	411	GO:0004478,GO:0005524,GO:0006556,GO:0006730,GO:0046872	K00789	S-adenosylmethionine synthase isoform type-2-like isoform X1
100	1.52691e-18	0.676814	0.743	0.628	2.06957e-14	Reconstitution	Bpl_scaf_53163-0.1	187	GO:0005515,GO:0006355,GO:0044238,GO:0044424,GO:0044822,GO:1901362	K09250	cellular nucleic acid-binding isoform X1
101	4.39593e-18	0.647723	0.5	0.294	5.95825e-14	Reconstitution	Bpl_scaf_4833-2.22	958	-	K12875	apoptotic chromatin condensation inducer in the nucleus-like
102	8.16702e-18	0.447208	0.268	0.101	1.10696e-13	Reconstitution	Bpl_scaf_19909-1.11	275	-	-	hypothetical protein CGI_10019002
103	3.20273e-17	0.52917	0.349	0.169	4.34098e-13	Reconstitution	Bpl_scaf_40897-0.6	78	-	-	---NA---
104	1.59953e-16	0.560303	0.657	0.47	2.168e-12	Reconstitution	Bpl_scaf_2723-4.12	6596	GO:0003779,GO:0005635	K19326	nesprin-1-like isoform X3
105	1.54902e-15	0.416498	0.298	0.134	2.09954e-11	Reconstitution	Bpl_scaf_21899-2.9	725	-	-	hepatoma-derived growth factor-related 2-like
106	4.96165e-15	0.56356	0.396	0.218	6.72502e-11	Reconstitution	Bpl_scaf_63665-1.12	9114	-	-	Cytadherence high molecular weight 2
107	8.56591e-15	0.471125	0.477	0.296	1.16102e-10	Reconstitution	Bpl_scaf_56339-11.18	2125	GO:0004672,GO:0016310	K08867	serine threonine- kinase WNK1-like isoform X5
108	8.67405e-15	0.525096	0.453	0.26	1.17568e-10	Reconstitution	Bpl_scaf_61993-0.4	291	-	-	sushi, von Willebrand factor type A, EGF and pentraxin domain-containing 1 isoform X1
109	3.90799e-14	0.435223	0.354	0.185	5.29689e-10	Reconstitution	Bpl_scaf_60067-11.23	5475	-	-	Cytadherence high molecular weight 2
110	7.22127e-14	0.478793	0.67	0.526	9.78771e-10	Reconstitution	Bpl_scaf_25973-3.4	88	-	-	---NA---
111	3.43525e-13	0.415547	0.379	0.22	4.65614e-09	Reconstitution	Bpl_scaf_55598-0.13	354	-	-	cyclic AMP-dependent transcription factor ATF-4-like
112	3.62584e-13	0.645265	0.283	0.138	4.91446e-09	Reconstitution	Bpl_scaf_55333-2.10	1065	GO:0006629,GO:0007165,GO:0008081	K05858	1-phosphatidylinositol 4,5-bisphosphate phosphodiesterase beta-4-like, partial
113	2.85258e-12	0.535929	0.481	0.332	3.86639e-08	Reconstitution	Bpl_scaf_24370-0.5	168	-	-	globin-like isoform X3
114	3.90694e-12	0.469073	0.439	0.277	5.29546e-08	Reconstitution	Bpl_scaf_22362-6.9	2026	GO:0035253,GO:0051297	K16469	rootletin-like isoform X7
115	6.66772e-12	0.445562	0.386	0.235	9.03742e-08	Reconstitution	Bpl_scaf_47439-2.23	329	-	K06772	I-type lectin 5
116	2.63746e-11	0.423819	0.319	0.177	3.57481e-07	Reconstitution	Bpl_scaf_64828-1.10	1482	GO:0016740	K11427	histone-lysine N-methyltransferase, H3 lysine-79 specific-like isoform X4
117	3.09261e-11	0.473954	0.388	0.241	4.19173e-07	Reconstitution	Bpl_scaf_53568-2.6	1117	GO:0000413,GO:0003755,GO:0006457	K09566	peptidyl-prolyl cis-trans isomerase G-like
118	7.7866e-11	0.41847	0.534	0.399	1.0554e-06	Reconstitution	Bpl_scaf_63348-10.10	700	GO:0003676,GO:0004386,GO:0005524,GO:0008152	K12823	probable ATP-dependent RNA helicase DDX5 isoform X1
119	1.21896e-10	0.43625	0.505	0.34	1.65217e-06	Reconstitution	Bpl_scaf_60908-4.14	1782	GO:0005488,GO:0006464,GO:0016301,GO:0016310,GO:0050794	-	mitogen-activated kinase kinase kinase 14-like
120	1.7085e-10	0.415684	0.757	0.643	2.3157e-06	Reconstitution	Bpl_scaf_21389-1.30	766	-	-	MAP kinase kinase kinase win1
121	3.41273e-10	0.457724	0.301	0.168	4.62561e-06	Reconstitution	Bpl_scaf_41724-1.2	484	-	-	RNA-directed DNA polymerase from transposon BS
122	4.51257e-10	0.621853	0.344	0.206	6.11634e-06	Reconstitution	Bpl_scaf_60262-0.0	233	-	-	PREDICTED: uncharacterized protein LOC105321561
123	1.12187e-09	0.416293	0.322	0.193	1.52059e-05	Reconstitution	Bpl_scaf_59490-0.7	1815	-	-	neurobeachin-like isoform X4
124	1.39161e-09	0.420943	0.603	0.461	1.88618e-05	Reconstitution	Bpl_scaf_19133-6.3	249	GO:0001664,GO:0003924,GO:0004871,GO:0005525,GO:0007186,GO:0008152,GO:0031683	K04634	guanine nucleotide-binding G(q) subunit alpha
125	3.21524e-09	0.566311	0.411	0.284	4.35794e-05	Reconstitution	Bpl_scaf_13642-5.8	654	GO:0005328,GO:0006836,GO:0016021,GO:0051536,GO:0055085	K05038	sodium- and chloride-dependent glycine transporter 1-like
126	4.18169e-08	0.407412	0.562	0.449	0.000566786	Reconstitution	Bpl_scaf_8188-0.18	469	GO:0003756,GO:0005783,GO:0006457,GO:0045454,GO:0051213,GO:0055114	K09580	disulfide isomerase
127	1.8822e-07	0.423843	0.66	0.564	0.00255113	Reconstitution	Bpl_scaf_36595-6.57	376	GO:0000281,GO:0005524,GO:0005884,GO:0005886,GO:0005925,GO:0005938,GO:0007126,GO:0009790,GO:0016887,GO:0030036,GO:0040011,GO:0097433	K05692	actin
128	2.93153e-07	0.418119	0.41	0.302	0.00397339	Reconstitution	Bpl_scaf_44217-4.35	420	GO:0003924,GO:0005200,GO:0005525,GO:0005737,GO:0005874,GO:0007017,GO:0008152,GO:0051258	-	Tubulin alpha-1C chain
129	9.60067e-06	0.406954	0.274	0.181	0.130127	Reconstitution	Bpl_scaf_56339-14.6	1454	-	-	PREDICTED: uncharacterized protein LOC105326108 isoform X5
130	8.83681e-213	5.61161	0.898	0.186	1.19774e-208	Starvation	Bpl_scaf_34471-1.10	221	-	K06721	asialoglyco receptor 1 isoform X1
131	7.24014e-181	2.7723	0.895	0.291	9.81329e-177	Starvation	Bpl_scaf_22849-1.5	139	-	-	---NA---
132	5.92511e-164	2.69957	0.684	0	8.0309e-160	Starvation	Bpl_scaf_38133-0.8	156	-	-	C-type lectin 6
133	2.70523e-162	3.95069	0.85	0.302	3.66667e-158	Starvation	Bpl_scaf_57916-0.0	100	-	-	---NA---
134	5.91882e-129	3.5984	0.841	0.385	8.02236e-125	Starvation	Bpl_scaf_58694-0.22	158	-	-	C-type lectin
135	1.9074e-112	1.69643	0.514	0	2.58529e-108	Starvation	Bpl_scaf_23446-0.7	137	-	-	neurocan core
136	3.93105e-111	2.71942	0.721	0.256	5.32815e-107	Starvation	Bpl_scaf_3643-3.6	111	-	-	---NA---
137	2.72599e-109	2.76862	0.738	0.242	3.6948e-105	Starvation	Bpl_scaf_49279-6.18	196	-	-	shell fibrous prismatic perlucin 1
138	1.01993e-106	2.47878	0.801	0.41	1.38242e-102	Starvation	Bpl_scaf_3643-4.12	57	-	-	---NA---
139	2.49838e-106	1.47764	0.491	0	3.3863e-102	Starvation	Bpl_scaf_13267-0.0	100	-	-	---NA---
140	9.50781e-103	2.00097	0.655	0.154	1.28869e-98	Starvation	Bpl_scaf_20338-0.1	110	-	-	, partial
141	3.71891e-99	1.47992	0.536	0.043	5.04061e-95	Starvation	Bpl_scaf_41651-0.2	249	-	-	H5p, partial
142	1.67264e-93	2.70827	0.897	0.634	2.26709e-89	Starvation	Bpl_scaf_20639-0.0	99	-	-	---NA---
143	8.95868e-89	1.11515	0.424	0	1.21426e-84	Starvation	Bpl_scaf_32287-1.5	168	-	-	galactose-specific lectin nattectin-like
144	1.70645e-88	1.58391	0.661	0.196	2.31293e-84	Starvation	Bpl_scaf_62453-0.8	70	-	-	conserved hypothetical protein, fragment
145	3.18809e-87	1.22796	0.418	0	4.32114e-83	Starvation	Bpl_scaf_3643-3.5	171	-	-	---NA---
146	1.12097e-83	1.60232	0.576	0.131	1.51936e-79	Starvation	Bpl_scaf_56223-0.0	421	-	-	H5p, partial
147	1.86345e-78	2.25916	0.939	0.761	2.52573e-74	Starvation	Bpl_scaf_23804-0.9	181	-	-	wsc domain-containing
148	4.21981e-73	1.96916	0.868	0.664	5.71953e-69	Starvation	Bpl_scaf_55758-0.1	169	-	-	---NA---
149	5.29349e-73	1.29481	0.36	0	7.17479e-69	Starvation	Bpl_scaf_30599-0.5	110	-	-	Macrophage mannose receptor 1
150	5.09408e-66	1.74956	0.665	0.302	6.90452e-62	Starvation	Bpl_scaf_18519-2.15	286	-	-	Fibrinogen C domain-containing 1
151	1.07916e-60	0.882688	0.306	0	1.46269e-56	Starvation	Bpl_scaf_41182-4.1	55	-	-	---NA---
152	2.09641e-60	0.777206	0.305	0	2.84147e-56	Starvation	Bpl_scaf_38133-1.1	80	-	-	galactose-specific lectin nattectin-like
153	2.28946e-49	0.659499	0.274	0.009	3.10314e-45	Starvation	Bpl_scaf_49279-5.10	230	-	-	neurocan core
154	9.36832e-48	1.30118	0.524	0.202	1.26978e-43	Starvation	Bpl_scaf_49279-6.17	244	-	-	aggrecan core
155	3.93262e-46	0.557505	0.257	0.008	5.33027e-42	Starvation	Bpl_scaf_54736-0.26	210	-	-	---NA---
156	2.05049e-44	2.19626	0.733	0.459	2.77923e-40	Starvation	Bpl_scaf_63360-12.8	215	-	-	---NA---
157	2.33716e-41	0.990756	0.569	0.267	3.16778e-37	Starvation	Bpl_scaf_2518-0.1	54	-	-	---NA---
158	6.82227e-41	1.16906	0.702	0.454	9.2469e-37	Starvation	Bpl_scaf_63360-14.9	213	-	-	---NA---
159	6.93888e-37	0.790997	0.334	0.075	9.40496e-33	Starvation	Bpl_scaf_59651-0.3	127	-	-	---NA---
160	3.24596e-36	0.730778	0.337	0.083	4.39958e-32	Starvation	Bpl_scaf_22849-0.1	452	-	-	RNA-directed DNA polymerase from mobile element jockey-like
161	1.45688e-34	0.740257	0.371	0.117	1.97465e-30	Starvation	Bpl_scaf_39898-0.4	157	-	-	Serine threonine- kinase ULK4
162	5.34156e-29	0.846826	0.666	0.451	7.23995e-25	Starvation	Bpl_scaf_1365-0.2	107	-	-	prostate-associated microsemino -like
163	8.1536e-28	0.583908	0.311	0.093	1.10514e-23	Starvation	Bpl_scaf_35655-0.11	389	-	-	cell wall integrity and stress response component 2-like
164	8.92871e-25	0.579698	0.406	0.172	1.2102e-20	Starvation	Bpl_scaf_56025-0.28	263	-	-	fibrinogen C domain-containing 1-like isoform X3
165	4.09371e-24	0.770133	0.588	0.389	5.54861e-20	Starvation	Bpl_scaf_61638-0.5	190	-	-	---NA---
166	4.75802e-24	0.693719	0.536	0.336	6.44902e-20	Starvation	Bpl_scaf_12478-0.11	461	-	-	Penicillin-binding 4
167	2.93353e-23	0.584753	0.386	0.166	3.97611e-19	Starvation	Bpl_scaf_10745-0.1	551	-	-	---NA---
168	9.77943e-23	0.444915	0.285	0.092	1.3255e-18	Starvation	Bpl_scaf_1365-0.0	107	-	-	prostate-associated microsemino -like
169	5.086e-22	1.24378	0.383	0.184	6.89356e-18	Starvation	Bpl_scaf_45750-0.6	509	GO:0000922,GO:0005815,GO:0007020	K16570	gamma-tubulin complex component 3 homolog
170	3.94978e-21	1.02701	0.421	0.211	5.35353e-17	Starvation	Bpl_scaf_19166-1.14	405	-	-	PREDICTED: uncharacterized protein LOC105328034
171	3.90585e-19	0.594902	0.323	0.135	5.29399e-15	Starvation	Bpl_scaf_41576-4.15	345	GO:0046872	-	cysteine and histidine-rich 1-like
172	5.9452e-18	0.926121	0.293	0.119	8.05813e-14	Starvation	Bpl_scaf_43116-1.54	391	-	-	---NA---
173	7.05356e-18	1.12437	0.267	0.103	9.56039e-14	Starvation	Bpl_scaf_52188-1.15	414	GO:0016020	-	deleted in malignant brain tumors 1 -like
174	9.37954e-18	1.82757	0.387	0.211	1.2713e-13	Starvation	Bpl_scaf_17778-1.17	4627	GO:0003777,GO:0003779,GO:0005524,GO:0007018,GO:0016301,GO:0016310,GO:0016887,GO:0030286	K10408	dynein heavy chain 10, axonemal-like isoform X1
175	9.67348e-18	0.627534	0.263	0.097	1.31114e-13	Starvation	Bpl_scaf_63539-1.16	154	-	-	hypothetical protein NEMVEDRAFT_v1g248679
176	1.40179e-17	0.495079	0.269	0.121	1.89999e-13	Starvation	Bpl_scaf_15646-0.14	156	-	-	C1q domain containing 1q11
177	8.95318e-15	0.470507	0.318	0.156	1.21351e-10	Starvation	Bpl_scaf_2201-14.14	110	-	-	---NA---
178	8.99483e-15	0.551461	0.593	0.418	1.21916e-10	Starvation	Bpl_scaf_51674-0.5	193	-	-	complement C1q 4
179	1.50328e-14	0.43692	0.944	0.907	2.03754e-10	Starvation	Bpl_scaf_43962-2.9	461	GO:0003746,GO:0003924,GO:0005525,GO:0005737,GO:0006414	K03231	elongation factor 1 alpha
180	1.02934e-13	0.488809	0.669	0.538	1.39517e-09	Starvation	Bpl_scaf_45479-0.6	92	GO:0003735,GO:0005840,GO:0006412,GO:0046872	K02921	60S ribosomal L37a
181	7.27257e-09	1.31504	0.318	0.204	9.85724e-05	Starvation	Bpl_scaf_33028-0.7	255	-	-	PREDICTED: uncharacterized protein LOC105318574
182	1.28826e-08	0.515756	0.779	0.689	0.000174611	Starvation	Bpl_scaf_55216-2.11	172	-	-	C1q domain containing 1q11
183	3.19041e-08	0.432198	0.314	0.215	0.000432429	Starvation	Bpl_scaf_23570-1.5	72	-	-	WSC domain-containing 2
184	6.38999e-07	0.556669	0.658	0.598	0.00866099	Starvation	Bpl_scaf_23570-1.11	217	-	-	wsc domain-containing
185	1.25246e-05	0.537558	0.318	0.242	0.169758	Starvation	Bpl_scaf_17051-23.14	216	-	-	gelsolin 2
186	4.98575e-05	0.497755	0.475	0.387	0.675769	Starvation	Bpl_scaf_63069-1.25	363	-	-	---NA---
187	0.000103084	0.450353	0.349	0.268	1	Starvation	Bpl_scaf_27182-0.8	806	GO:0016043	K08017	villin-1-like isoform X3
188	0.000197745	0.428666	0.297	0.24	1	Starvation	Bpl_scaf_38038-0.0	75	-	-	---NA---

## Sheet: Supplementary File 1j
Supplementary File 1j. Cell cluster specific Differentially expressed genes among the three deep-sea in situ treatments treatments, the Apical ridge ciliary cell.
	p_val	avg_log2FC	pct.1	pct.2	p_val_adj	cluster	gene	Prot_Length	GO_ID	KEGG_ko	Description
1	1.7114e-54	1.7136	0.719	0.017	2.31963e-50	Fanmao	Bpl_scaf_43051-0.3	233	-	-	PREDICTED: uncharacterized protein LOC105335571
2	2.09291e-44	2.34624	0.938	0.085	2.83673e-40	Fanmao	Bpl_scaf_14002-1.10	209	-	-	baculoviral IAP repeat-containing 7-A-like
3	1.64109e-43	1.23221	0.562	0.012	2.22433e-39	Fanmao	Bpl_scaf_36688-0.22	446	-	-	H5p, partial
4	8.81517e-26	0.602249	0.312	0.005	1.19481e-21	Fanmao	Bpl_scaf_17051-13.8	206	-	K04097	glutathione S-transferase sigma 3
5	1.12437e-21	0.939627	0.375	0.019	1.52397e-17	Fanmao	Bpl_scaf_6384-5.17	693	-	-	---NA---
6	4.90739e-20	0.64246	0.25	0.005	6.65148e-16	Fanmao	Bpl_scaf_63348-9.8	638	-	-	protocadherin-like wing polarity stan isoform X1
7	1.01357e-19	1.49725	0.688	0.123	1.37379e-15	Fanmao	Bpl_scaf_61985-5.10	2593	-	K04437	filamin -1
8	1.94253e-17	1.12069	0.406	0.038	2.63291e-13	Fanmao	Bpl_scaf_50748-0.16	424	-	-	SH3 domain-containing -like isoform X1
9	6.91581e-17	0.710716	0.312	0.019	9.37368e-13	Fanmao	Bpl_scaf_65428-5.4	155	GO:0004126,GO:0008270,GO:0009972	K01489	cytidine deaminase-like
10	1.83478e-16	0.81835	0.281	0.014	2.48686e-12	Fanmao	Bpl_scaf_46524-0.9	608	-	-	zinc metallo ase nas-15-like
11	1.92131e-16	1.62644	0.781	0.215	2.60414e-12	Fanmao	Bpl_scaf_35290-1.7	352	-	-	flocculation FLO10-like
12	2.03579e-16	1.33109	0.594	0.104	2.75931e-12	Fanmao	Bpl_scaf_35263-1.11	291	-	-	GTPase IMAP family member 7-like
13	8.69305e-15	1.62677	0.594	0.118	1.17826e-10	Fanmao	Bpl_scaf_54651-5.17	193	GO:0005515	-	PREDICTED: myophilin-like
14	9.86828e-15	1.6595	1	0.566	1.33755e-10	Fanmao	Bpl_scaf_57259-5.3	629	-	-	cytoplasmic intermediate filament A
15	1.0917e-14	0.64578	0.406	0.045	1.47969e-10	Fanmao	Bpl_scaf_1739-0.57	433	GO:0005921,GO:0006811,GO:0016021	-	Innexin unc-9
16	3.68589e-12	3.61871	0.594	0.158	4.99585e-08	Fanmao	Bpl_scaf_63703-4.15	667	-	-	Inhibitor of apoptosis
17	3.7395e-12	1.02838	0.531	0.106	5.06852e-08	Fanmao	Bpl_scaf_31664-2.6	131	-	-	---NA---
18	9.68768e-12	1.86704	0.781	0.363	1.31307e-07	Fanmao	Bpl_scaf_48581-0.7	224	-	-	PREDICTED: uncharacterized protein LOC105328788 isoform X2
19	1.9579e-11	1.53844	0.781	0.34	2.65374e-07	Fanmao	Bpl_scaf_63703-4.35	72	GO:0046872	-	MT22_MYTED ame: Full=Metallothionein 20-II Short=MT-20-II
20	3.76329e-11	1.37843	0.562	0.137	5.10076e-07	Fanmao	Bpl_scaf_60708-1.10	182	-	K16817	HRAS-like suppressor 2
21	4.75357e-11	1.3312	0.812	0.33	6.44298e-07	Fanmao	Bpl_scaf_22242-2.44	432	GO:0003924,GO:0005200,GO:0005525,GO:0005737,GO:0005874,GO:0007017,GO:0008152,GO:0021634,GO:0043066,GO:0051258	K07374	tubulin alpha-1A chain-like, partial
22	7.81015e-11	0.451646	0.281	0.031	1.05859e-06	Fanmao	Bpl_scaf_58990-0.2	268	-	-	Myosin light chain kinase, smooth muscle
23	2.77252e-10	0.921226	0.406	0.073	3.75787e-06	Fanmao	Bpl_scaf_39834-0.3	526	GO:0005488,GO:0010033,GO:0016491,GO:0044710,GO:0050794	-	25-hydroxyvitamin D-1 alpha hydroxylase, mitochondrial
24	5.87073e-10	1.20216	0.969	0.863	7.95719e-06	Fanmao	Bpl_scaf_46488-6.34	128	GO:0005840	K02975	ribosomal S25
25	7.64985e-10	1.46989	0.844	0.542	1.03686e-05	Fanmao	Bpl_scaf_38266-3.33	402	GO:0003735,GO:0005840,GO:0006412	K02925	60S ribosomal L3
26	1.16247e-09	0.865147	0.562	0.146	1.57561e-05	Fanmao	Bpl_scaf_38107-0.8	563	-	-	chordin 2 isoform X2
27	1.34296e-09	1.17433	0.406	0.085	1.82025e-05	Fanmao	Bpl_scaf_35263-1.8	295	-	-	GTPase IMAP family member 4
28	5.73263e-09	0.697485	0.25	0.031	7.77e-05	Fanmao	Bpl_scaf_37700-9.22	101	-	-	---NA---
29	2.82256e-08	1.15681	0.875	0.634	0.000382569	Fanmao	Bpl_scaf_30366-9.12	150	GO:0003723,GO:0003735,GO:0006412,GO:0015935	K02958	40S ribosomal S15
30	5.65586e-08	0.489289	0.406	0.09	0.000766595	Fanmao	Bpl_scaf_32538-10.8	351	-	-	Serine threonine- kinase ULK4
31	1.11269e-07	0.785876	0.406	0.101	0.00150814	Fanmao	Bpl_scaf_40143-0.7	295	-	-	GTPase IMAP family member 4-like
32	1.01031e-06	0.732412	0.656	0.281	0.0136937	Fanmao	Bpl_scaf_52001-2.8	201	-	K12462	Rho GDP-dissociation inhibitor 1
33	1.01778e-06	0.783269	1	0.943	0.013795	Fanmao	Bpl_scaf_49180-1.5	1989	GO:0005622,GO:0035556,GO:0046872	K18061	myotubularin-related 13-like isoform X4
34	1.27992e-06	0.494188	0.312	0.068	0.0173481	Fanmao	Bpl_scaf_3387-5.47	507	-	-	cartilage matrix -like
35	1.54114e-06	0.829039	0.906	0.717	0.0208886	Fanmao	Bpl_scaf_15281-0.21	175	GO:0003735,GO:0005840,GO:0006412,GO:0019843	K02940	60S ribosomal L9
36	2.12935e-06	1.2556	0.812	0.498	0.0288613	Fanmao	Bpl_scaf_22089-0.17	392	GO:0016021	K16336	syndecan-like isoform X1
37	2.8351e-06	0.939486	0.781	0.476	0.038427	Fanmao	Bpl_scaf_15478-2.4	344	GO:0005840,GO:0042254	K02941	60S acidic ribosomal P0
38	3.37273e-06	0.665122	0.656	0.288	0.045714	Fanmao	Bpl_scaf_1371-2.4	1108	-	K06825	Zonadhesin
39	3.81407e-06	1.30742	0.906	0.83	0.0516959	Fanmao	Bpl_scaf_13236-2.10	263	GO:0004322,GO:0005623,GO:0006826,GO:0006879,GO:0008199,GO:0055114	K00522	Soma ferritin
40	4.96e-06	0.900757	0.906	0.67	0.0672278	Fanmao	Bpl_scaf_4947-1.6	56	-	-	---NA---
41	5.54378e-06	0.84324	0.375	0.111	0.0751404	Fanmao	Bpl_scaf_64398-0.3	115	-	-	---NA---
42	6.01189e-06	0.682695	0.312	0.078	0.0814852	Fanmao	Bpl_scaf_59651-0.3	127	-	-	---NA---
43	8.73041e-06	0.72254	0.281	0.068	0.118332	Fanmao	Bpl_scaf_55014-3.11	95	-	-	---NA---
44	1.11035e-05	0.909009	0.812	0.594	0.150497	Fanmao	Bpl_scaf_32549-2.1	305	GO:0003723,GO:0003735,GO:0006412,GO:0015935	K02989	40S ribosomal S5
45	2.07064e-05	0.660612	0.969	0.866	0.280655	Fanmao	Bpl_scaf_56862-1.23	218	GO:0003735,GO:0005840,GO:0006412	K02912	ribosomal L32
46	2.67369e-05	0.695629	0.406	0.139	0.362392	Fanmao	Bpl_scaf_8163-0.13	160	-	-	PREDICTED: uncharacterized protein LOC105337979 isoform X1
47	2.96253e-05	2.77391	0.281	0.073	0.401541	Fanmao	Bpl_scaf_268-5.8	509	-	-	serine threonine- phosphatase 6 regulatory ankyrin repeat subunit B-like
48	6.29484e-05	0.655846	0.969	0.774	0.853203	Fanmao	Bpl_scaf_11851-1.32	289	GO:0005840,GO:0042254	K02936	60S ribosomal L7a-like
49	6.37065e-05	0.497143	0.531	0.219	0.863478	Fanmao	Bpl_scaf_57223-5.10	1050	GO:0004839,GO:0004842,GO:0005524,GO:0005634,GO:0005829,GO:0016567,GO:0019941	K03178	ubiquitin-like modifier-activating enzyme 1 isoform X2
50	8.9198e-05	0.835816	0.812	0.62	1	Fanmao	Bpl_scaf_7842-4.11	280	GO:0003729,GO:0003735,GO:0005654,GO:0005925,GO:0006412,GO:0016020,GO:0017134,GO:0019899,GO:0022627,GO:0051347,GO:0070062	K02981	40S ribosomal S2
51	0.0001236	0.768242	0.656	0.33	1	Fanmao	Bpl_scaf_24592-4.10	500	GO:0003743,GO:0004386,GO:0005524,GO:0006413	K03257	eukaryotic initiation factor 4A-I-like
52	0.000155486	0.945951	0.75	0.491	1	Fanmao	Bpl_scaf_59648-12.44	186	GO:0003735,GO:0006412,GO:0016020,GO:0022625,GO:0044822	K02882	60S ribosomal L18a
53	0.000172427	0.682016	0.5	0.238	1	Fanmao	Bpl_scaf_57223-4.40	269	GO:0005525,GO:0005622,GO:0005886,GO:0007264	K04513	Ras-like GTP-binding Rho1
54	0.000294549	0.709851	0.781	0.559	1	Fanmao	Bpl_scaf_61662-4.14	204	GO:0003735,GO:0005840,GO:0006412	K02877	60S ribosomal L15
55	0.000320579	0.561045	0.25	0.073	1	Fanmao	Bpl_scaf_20890-3.13	112	GO:0000502	-	26S proteasome non-ATPase regulatory subunit 1-like
56	0.000401694	0.582363	0.906	0.745	1	Fanmao	Bpl_scaf_3471-3.11	212	GO:0003735,GO:0005840,GO:0006412	K02873	60S ribosomal L13-like
57	0.000558717	0.885742	0.75	0.554	1	Fanmao	Bpl_scaf_13042-1.41	148	GO:0003735,GO:0005840,GO:0006412	K02868	ribosomal L11
58	0.00059561	0.614303	0.969	0.863	1	Fanmao	Bpl_scaf_56354-8.14	137	GO:0003735,GO:0005840,GO:0006412	K02976	40S ribosomal S26
59	0.000600545	0.462463	0.375	0.142	1	Fanmao	Bpl_scaf_62926-1.18	1670	-	-	von Willebrand factor D and EGF domain-containing -like
60	0.000601098	0.773886	0.875	0.63	1	Fanmao	Bpl_scaf_53430-3.6	323	-	-	---NA---
61	0.000666209	0.634116	0.438	0.208	1	Fanmao	Bpl_scaf_3306-2.3	767	-	-	stress response nst1-like
62	0.000723657	1.57151	0.562	0.408	1	Fanmao	Bpl_scaf_29041-0.21	235	-	-	---NA---
63	0.000749599	0.529571	1	0.92	1	Fanmao	Bpl_scaf_2519-1.14	138	GO:0003735,GO:0005840,GO:0006412	K02951	40S ribosomal S12-like
64	0.000890256	0.582289	0.406	0.182	1	Fanmao	Bpl_scaf_17714-8.5	485	-	-	tumor necrosis factor receptor superfamily member 4-like
65	0.00101757	0.792384	0.75	0.524	1	Fanmao	Bpl_scaf_1905-1.32	679	-	K11722	bromodomain-containing 3-like isoform X1
66	0.00108254	0.7363	0.812	0.722	1	Fanmao	Bpl_scaf_5538-4.10	284	-	K10373	TPM_PERVI ame: Full=Tropomyosin
67	0.00119102	0.554987	0.438	0.208	1	Fanmao	Bpl_scaf_48489-0.7	295	GO:0043167	-	NAD-dependent lipoamidase sirtuin-4, mitochondrial
68	0.00119952	0.628467	0.906	0.726	1	Fanmao	Bpl_scaf_54665-10.11	207	GO:0003735,GO:0005840,GO:0006412	K02883	60S ribosomal L18
69	0.0012471	0.81925	0.875	0.807	1	Fanmao	Bpl_scaf_7213-3.10	2622	-	-	PRRC2C-like isoform X2
70	0.00125747	2.59506	0.281	0.108	1	Fanmao	Bpl_scaf_22826-0.7	200	-	-	AAC-rich mRNA clone AAC4
71	0.00146954	0.6835	0.844	0.712	1	Fanmao	Bpl_scaf_44032-0.1	203	GO:0003735,GO:0006412,GO:0015934	K02872	60S ribosomal L13A
72	0.00165326	0.763954	0.906	0.731	1	Fanmao	Bpl_scaf_10588-4.10	465	GO:0003735,GO:0005840,GO:0006412	K02930	60S ribosomal L4
73	0.00166111	0.630299	0.844	0.771	1	Fanmao	Bpl_scaf_17081-2.11	51	GO:0003735,GO:0005840,GO:0006412	K02924	ribosomal L39, partial
74	0.00179584	0.444735	0.969	0.785	1	Fanmao	Bpl_scaf_63854-9.11	260	GO:0003735,GO:0005840,GO:0006412	K02938	60S ribosomal L8
75	0.00205016	0.592895	0.281	0.108	1	Fanmao	Bpl_scaf_24781-5.29	311	GO:0008469,GO:0034969	K11434	arginine N-methyltransferase 1-like
76	0.00208431	0.486283	0.281	0.108	1	Fanmao	Bpl_scaf_33774-1.23	235	-	-	---NA---
77	0.00210709	0.66565	0.875	0.804	1	Fanmao	Bpl_scaf_60144-0.6	84	GO:0003735,GO:0005840,GO:0006412,GO:0046872	K02978	40S ribosomal S27-like
78	0.00233909	0.789036	0.719	0.524	1	Fanmao	Bpl_scaf_20076-0.1	103	GO:0003735,GO:0005840,GO:0006412	K02995	40S ribosomal S8-like
79	0.00241978	0.476555	0.5	0.271	1	Fanmao	Bpl_scaf_52975-2.40	76	GO:0005622	K02983	40S ribosomal S30
80	0.00255167	0.603906	0.438	0.222	1	Fanmao	Bpl_scaf_3127-1.12	225	-	K10436	microtubule-associated RP EB family member 3-like isoform X2
81	0.00273641	0.463043	0.844	0.616	1	Fanmao	Bpl_scaf_16646-2.15	511	GO:0003676,GO:0043227,GO:0043229	K11294	nucleolin-like isoform X2
82	0.00274967	0.644042	0.344	0.151	1	Fanmao	Bpl_scaf_1371-5.5	356	GO:0000166,GO:0003676,GO:0019013,GO:0030529	K12741	heterogeneous nuclear ribonucleo A1-like isoform X1
83	0.00276359	0.68196	0.812	0.672	1	Fanmao	Bpl_scaf_34444-0.30	211	GO:0003735,GO:0005840,GO:0006412	K02991	40S ribosomal S6
84	0.00279285	0.513672	0.781	0.667	1	Fanmao	Bpl_scaf_37494-0.7	168	GO:0000166,GO:0003735,GO:0005840,GO:0006412	K02893	60S ribosomal L23a-like
85	0.00286514	0.566311	0.344	0.149	1	Fanmao	Bpl_scaf_43244-0.14	319	GO:0004674,GO:0005524,GO:0005737,GO:0007634,GO:0008134,GO:0008283,GO:0030097,GO:0030145,GO:0031659,GO:0043024,GO:0043066,GO:0043433,GO:0046777,GO:0048593,GO:0070561	K08807	serine threonine- kinase pim-1-like
86	0.00290985	0.42903	0.281	0.113	1	Fanmao	Bpl_scaf_61340-2.9	219	GO:0005484,GO:0005622,GO:0006886,GO:0016020,GO:0016192,GO:0061025	K08488	syntaxin-7-like isoform X1
87	0.00332367	0.631946	0.844	0.743	1	Fanmao	Bpl_scaf_30175-7.5	282	GO:0003677,GO:0006355	K09276	Y-Box factor
88	0.00340975	0.560912	0.75	0.66	1	Fanmao	Bpl_scaf_53185-11.12	135	GO:0003735,GO:0005840,GO:0006412	K02903	ribosomal L28
89	0.00351123	0.647512	0.844	0.686	1	Fanmao	Bpl_scaf_53568-3.4	69	GO:0000022,GO:0005840,GO:0017022,GO:0022008	K02894	60S ribosomal L23
90	0.00435389	0.727241	0.594	0.406	1	Fanmao	Bpl_scaf_9255-0.9	147	GO:0003735,GO:0006412,GO:0015934	K02900	60S ribosomal L27a-like
91	0.00472738	0.519318	0.312	0.134	1	Fanmao	Bpl_scaf_19909-1.11	275	-	-	hypothetical protein CGI_10019002
92	0.00472756	0.674258	0.719	0.524	1	Fanmao	Bpl_scaf_48777-1.5	504	GO:0003676,GO:0046872	K09206	Krueppel-like factor 5
93	0.00489207	0.448105	0.688	0.507	1	Fanmao	Bpl_scaf_29079-0.5	153	GO:0003735,GO:0005840,GO:0006351,GO:0006412,GO:0046983	K02949	40S ribosomal S11
94	0.00508005	0.520394	0.656	0.458	1	Fanmao	Bpl_scaf_13698-0.10	380	GO:0003735,GO:0005840,GO:0006412	K02889	60S ribosomal L21-like
95	0.00518374	0.416607	0.375	0.186	1	Fanmao	Bpl_scaf_9000-2.5	1530	GO:0003824,GO:0005634,GO:0008134,GO:0008152	-	disco-interacting 2 homolog C-like isoform X8
96	0.00547196	0.409173	0.281	0.118	1	Fanmao	Bpl_scaf_56162-7.6	374	-	-	threonine-rich GPI-anchored glyco
97	0.00567664	0.442729	0.469	0.257	1	Fanmao	Bpl_scaf_64300-3.5	405	GO:0016020,GO:0016740	K13516	lysophospholipid acyltransferase 7-like
98	0.00679463	0.562562	0.875	0.719	1	Fanmao	Bpl_scaf_51690-1.23	211	GO:0003723,GO:0030529	K02987	40S ribosomal S4-like
99	0.00712355	0.549677	0.75	0.62	1	Fanmao	Bpl_scaf_54280-0.16	226	GO:0003735,GO:0006412,GO:0022627	K02984	40S ribosomal S3a-like
100	0.0078374	0.657042	0.375	0.191	1	Fanmao	Bpl_scaf_59360-0.26	105	-	-	---NA---
101	0.00856388	0.563788	0.625	0.399	1	Fanmao	Bpl_scaf_63657-2.1	303	GO:0019904	K06630	14-3-3 epsilon
102	0.00869739	0.448483	0.906	0.792	1	Fanmao	Bpl_scaf_59681-3.28	93	-	K02885	60S ribosomal L19
103	0.00931626	0.581357	0.656	0.517	1	Fanmao	Bpl_scaf_16054-2.22	136	GO:0000183,GO:0000788,GO:0000979,GO:0000980,GO:0001649,GO:0001740,GO:0005654,GO:0005700,GO:0006336,GO:0006997,GO:0007140,GO:0007155,GO:0007264,GO:0007420,GO:0007596,GO:0008270,GO:0008360,GO:0009725,GO:0010467,GO:0030307,GO:0031492,GO:0032776,GO:0033554,GO:0042393,GO:0042692,GO:0046982,GO:0070062,GO:0090230,GO:0098770,GO:1902340	K11253	histone
104	0.0098909	0.522949	0.594	0.422	1	Fanmao	Bpl_scaf_21636-3.22	114	GO:0003735,GO:0005840,GO:0006412	K02908	60S ribosomal L30
105	2.80988e-61	5.02349	0.863	0.027	3.80852e-57	Reconstitution	Bpl_scaf_55952-0.12	714	-	-	---NA---
106	9.65765e-29	1.57061	0.7	0.237	1.309e-24	Reconstitution	Bpl_scaf_33596-7.3	258	-	-	carbonic anhydrase 1-like
107	1.88856e-24	0.941224	0.437	0.005	2.55975e-20	Reconstitution	Bpl_scaf_58225-0.3	92	-	-	---NA---
108	3.20085e-21	1.54961	0.556	0.151	4.33843e-17	Reconstitution	Bpl_scaf_43856-2.10	1475	-	-	---NA---
109	1.1871e-18	1.16992	0.478	0.102	1.60899e-14	Reconstitution	Bpl_scaf_16935-0.17	266	-	-	A disintegrin and metallo ase with thrombospondin motifs gon-1-like
110	3.7223e-18	1.20946	0.656	0.317	5.04521e-14	Reconstitution	Bpl_scaf_36964-11.16	3833	GO:0003777,GO:0005524,GO:0007018,GO:0008152,GO:0030286	-	dynein heavy chain 3, axonemal-like
111	4.02923e-18	0.802943	0.478	0.086	5.46122e-14	Reconstitution	Bpl_scaf_62441-3.7	198	-	K17725	persulfide dioxygenase ETHE1, mitochondrial-like isoform X1
112	1.08113e-15	1.33345	0.844	0.64	1.46537e-11	Reconstitution	Bpl_scaf_48274-0.3	257	-	K01672	carbonic anhydrase 1-like
113	2.07706e-15	0.951886	0.907	0.796	2.81524e-11	Reconstitution	Bpl_scaf_6901-7.5	2075	-	K00698	Chitin synthase 1
114	4.64256e-15	0.789218	0.344	0.038	6.29252e-11	Reconstitution	Bpl_scaf_61230-5.11	903	GO:0006820,GO:0008509,GO:0016020	K13858	electroneutral sodium bicarbonate exchanger 1-like isoform X1
115	5.34068e-15	2.01752	0.467	0.14	7.23875e-11	Reconstitution	Bpl_scaf_62409-0.16	935	GO:0005488	-	PREDICTED: uncharacterized protein LOC105333786 isoform X2
116	2.58541e-13	0.709819	0.37	0.07	3.50427e-09	Reconstitution	Bpl_scaf_15800-0.5	367	GO:0004648,GO:0005737,GO:0006564,GO:0070062	K00831	Phosphoserine aminotransferase
117	6.74897e-13	0.607719	0.27	0.016	9.14756e-09	Reconstitution	Bpl_scaf_1866-2.25	533	GO:0016616,GO:0044710	K00058	D-3-phosphoglycerate dehydrogenase-like
118	4.56236e-12	0.917228	0.374	0.102	6.18382e-08	Reconstitution	Bpl_scaf_5398-0.38	557	GO:0003824	-	trans-homoaconitate synthase
119	7.60274e-12	0.758502	0.467	0.183	1.03048e-07	Reconstitution	Bpl_scaf_55598-0.13	354	-	-	cyclic AMP-dependent transcription factor ATF-4-like
120	7.78871e-12	0.646821	0.322	0.059	1.05568e-07	Reconstitution	Bpl_scaf_26757-3.8	575	GO:0004414,GO:0005737,GO:0009086	K00641	probable serine-O-acetyltransferase cys2
121	2.07436e-11	0.759379	0.489	0.21	2.81159e-07	Reconstitution	Bpl_scaf_29450-1.2	237	GO:0003700,GO:0003707,GO:0005496,GO:0005634,GO:0006351,GO:0006355,GO:0008270,GO:0043401,GO:0043565	K08554	steroid hormone receptor ERR2-like isoform X1
122	6.11265e-11	0.863596	0.615	0.392	8.28509e-07	Reconstitution	Bpl_scaf_61662-2.9	348	GO:0008270,GO:0016491,GO:0055114	-	geraniol dehydrogenase 1-like isoform X2
123	2.44127e-10	0.826482	0.452	0.194	3.3089e-06	Reconstitution	Bpl_scaf_60489-3.7	362	GO:0016020,GO:0044765	K15116	solute carrier family 25 member 36-like
124	6.92203e-10	0.471769	0.57	0.43	9.38212e-06	Reconstitution	Bpl_scaf_64954-7.11	641	-	-	PREDICTED: uncharacterized protein LOC105325275
125	8.58094e-10	1.27043	0.333	0.097	1.16306e-05	Reconstitution	Bpl_scaf_40880-0.16	482	-	-	serine threonine- phosphatase 6 regulatory ankyrin repeat subunit B-like isoform X1
126	9.40391e-10	1.06216	0.881	0.806	1.27461e-05	Reconstitution	Bpl_scaf_58954-2.7	184	GO:0044765	-	Transient receptor potential cation channel subfamily M member 3
127	1.26589e-09	0.770808	0.541	0.312	1.71579e-05	Reconstitution	Bpl_scaf_26757-3.20	360	GO:0004356,GO:0005524,GO:0006542	K01915	Glutamine synthetase
128	1.32007e-09	1.36929	0.567	0.339	1.78922e-05	Reconstitution	Bpl_scaf_41063-6.8	669	-	-	lipoxygenase homology domain-containing 1-like isoform X1
129	1.94267e-09	0.714914	0.359	0.118	2.63309e-05	Reconstitution	Bpl_scaf_19010-15.6	445	GO:0016740	-	N-acetylserotonin O-methyltransferase
130	2.97516e-09	0.797357	0.393	0.161	4.03253e-05	Reconstitution	Bpl_scaf_40897-0.6	78	-	-	---NA---
131	3.24128e-09	0.524971	0.267	0.054	4.39323e-05	Reconstitution	Bpl_scaf_15282-3.10	493	GO:0008168,GO:0032259	K05929	phosphoethanolamine N-methyltransferase 3-like isoform X3
132	4.18521e-09	0.947112	0.504	0.28	5.67263e-05	Reconstitution	Bpl_scaf_48945-0.2	306	-	-	zinc finger MYM-type 4-like
133	5.22699e-09	0.607462	0.441	0.194	7.08466e-05	Reconstitution	Bpl_scaf_46270-3.13	1536	-	K03260	eukaryotic translation initiation factor 4 gamma 1-like isoform X3
134	5.8748e-09	0.527058	0.744	0.57	7.96271e-05	Reconstitution	Bpl_scaf_61993-0.4	291	-	-	sushi, von Willebrand factor type A, EGF and pentraxin domain-containing 1 isoform X1
135	6.22755e-09	0.507197	0.259	0.054	8.44082e-05	Reconstitution	Bpl_scaf_38784-5.7	355	GO:0009916,GO:0055114	-	alternative oxidase, mitochondrial-like
136	1.32101e-08	0.828892	0.744	0.597	0.000179049	Reconstitution	Bpl_scaf_47525-1.6	531	-	-	---NA---
137	1.53954e-08	0.512531	0.252	0.054	0.000208669	Reconstitution	Bpl_scaf_54310-1.17	1138	-	K11795	DDB1- and CUL4-associated factor 6-like
138	1.62632e-08	0.814413	0.581	0.36	0.000220431	Reconstitution	Bpl_scaf_1-0.2	477	-	-	heat shock 70 kDa 12A-like
139	4.05674e-08	1.07667	0.685	0.489	0.000549851	Reconstitution	Bpl_scaf_32300-1.15	652	-	-	baculoviral IAP repeat-containing 7-B-like
140	5.03124e-08	0.62809	0.556	0.317	0.000681934	Reconstitution	Bpl_scaf_681-0.13	180	-	K03016	DNA-directed RNA polymerases I, II, and III subunit RPABC3
141	9.16867e-08	0.523379	0.356	0.14	0.00124272	Reconstitution	Bpl_scaf_1368-0.3	153	GO:0000154,GO:0030515,GO:0031428,GO:0032040	-	Nucleolar 58
142	1.1216e-07	0.530656	0.263	0.075	0.00152021	Reconstitution	Bpl_scaf_44604-4.5	472	GO:0005525,GO:0005622,GO:0007264	K17201	ADP-ribosylation factor 15
143	2.61893e-07	0.731358	0.73	0.597	0.0035497	Reconstitution	Bpl_scaf_53163-0.1	187	GO:0005515,GO:0006355,GO:0044238,GO:0044424,GO:0044822,GO:1901362	K09250	cellular nucleic acid-binding isoform X1
144	2.95839e-07	0.619382	0.4	0.194	0.0040098	Reconstitution	Bpl_scaf_49759-5.9	494	GO:0001948,GO:0005524,GO:0005788,GO:0005793,GO:0005886,GO:0005925,GO:0006983,GO:0006987,GO:0008180,GO:0009986,GO:0016491,GO:0019904,GO:0021589,GO:0021680,GO:0021762,GO:0030176,GO:0030335,GO:0030496,GO:0030512,GO:0031398,GO:0031625,GO:0034663,GO:0035437,GO:0042149,GO:0043022,GO:0043066,GO:0043209,GO:0051603,GO:0051787,GO:0070062,GO:0071353,GO:1901998	-	78 kDa glucose-regulated
145	5.56215e-07	0.591432	0.519	0.306	0.00753893	Reconstitution	Bpl_scaf_53568-2.6	1117	GO:0000413,GO:0003755,GO:0006457	K09566	peptidyl-prolyl cis-trans isomerase G-like
146	6.18289e-07	0.623306	0.593	0.414	0.00838029	Reconstitution	Bpl_scaf_63348-10.10	700	GO:0003676,GO:0004386,GO:0005524,GO:0008152	K12823	probable ATP-dependent RNA helicase DDX5 isoform X1
147	6.79393e-07	0.575507	0.711	0.522	0.00920849	Reconstitution	Bpl_scaf_58896-4.11	2052	-	K11643	chromodomain-helicase-DNA-binding 4-like isoform X3
148	9.25358e-07	0.581664	0.426	0.21	0.0125423	Reconstitution	Bpl_scaf_25269-0.15	398	-	-	PREDICTED: uncharacterized protein LOC105346378
149	9.65355e-07	0.471338	0.356	0.161	0.0130844	Reconstitution	Bpl_scaf_36179-1.3	447	GO:0005743,GO:0070224	K17218	Sulfide:quinone oxidoreductase, mitochondrial
150	1.33874e-06	0.667477	0.411	0.226	0.0181453	Reconstitution	Bpl_scaf_33543-0.10	386	-	K07984	src kinase-associated phospho 1-like
151	1.6185e-06	0.737062	0.426	0.226	0.0219372	Reconstitution	Bpl_scaf_1856-1.9	1077	-	-	Chitin synthase C
152	6.04265e-06	0.648653	0.467	0.29	0.0819021	Reconstitution	Bpl_scaf_9704-7.6	353	GO:0000188,GO:0004725,GO:0017017,GO:0035335	K04459	dual specificity phosphatase 7-like
153	6.516e-06	0.547797	0.47	0.285	0.0883179	Reconstitution	Bpl_scaf_22762-1.5	970	-	-	WD repeat-containing 63-like
154	1.21438e-05	0.825834	0.463	0.306	0.164598	Reconstitution	Bpl_scaf_59225-0.0	187	-	-	kelch 29 isoform X1
155	1.28345e-05	0.474995	0.367	0.199	0.173959	Reconstitution	Bpl_scaf_4947-10.10	1067	-	-	PREDICTED: uncharacterized protein LOC105319401 isoform X7
156	1.51844e-05	0.531187	0.556	0.376	0.205809	Reconstitution	Bpl_scaf_24012-4.8	936	GO:0005634,GO:0006397,GO:0008380	K13171	serine arginine repetitive matrix 1-like isoform X1
157	1.65285e-05	0.548491	0.607	0.462	0.224027	Reconstitution	Bpl_scaf_34764-3.19	728	-	K11294	nucleolin-like isoform X1
158	2.80234e-05	0.489358	0.385	0.226	0.379829	Reconstitution	Bpl_scaf_21031-4.17	328	GO:0003333,GO:0015171,GO:0016021	K13868	b(0,+)-type amino acid transporter 1-like isoform X3
159	5.74792e-05	0.57089	0.393	0.237	0.779073	Reconstitution	Bpl_scaf_24370-0.5	168	-	-	globin-like isoform X3
160	6.02746e-05	0.427389	0.252	0.113	0.816961	Reconstitution	Bpl_scaf_36689-8.21	194	-	-	hypothetical protein LOTGIDRAFT_189496
161	8.17575e-05	0.611463	0.652	0.565	1	Reconstitution	Bpl_scaf_25973-3.4	88	-	-	---NA---
162	0.000110828	0.469214	0.296	0.151	1	Reconstitution	Bpl_scaf_59648-12.37	657	GO:0005488	K09487	glucose-regulated 94
163	0.000146644	0.59631	0.689	0.629	1	Reconstitution	Bpl_scaf_36595-6.57	376	GO:0000281,GO:0005524,GO:0005884,GO:0005886,GO:0005925,GO:0005938,GO:0007126,GO:0009790,GO:0016887,GO:0030036,GO:0040011,GO:0097433	K05692	actin
164	0.000199538	0.453784	0.896	0.855	1	Reconstitution	Bpl_scaf_56354-7.8	997	-	-	Reticulocyte-binding 2 a
165	0.000203342	0.499832	0.507	0.366	1	Reconstitution	Bpl_scaf_14919-4.12	1837	-	K15712	E3 ubiquitin- ligase TTC3-like
166	0.000217078	0.505781	0.604	0.5	1	Reconstitution	Bpl_scaf_17778-1.40	146	-	K05765	actin-depolymerizing factor 6
167	0.000221332	0.458812	0.407	0.269	1	Reconstitution	Bpl_scaf_31557-6.11	4529	GO:0003777,GO:0005524,GO:0007018,GO:0008152,GO:0016887,GO:0030286	K10408	dynein heavy chain 2, axonemal isoform X1
168	0.000247508	0.54901	0.811	0.747	1	Reconstitution	Bpl_scaf_50887-8.25	1757	-	K16771	centrosome and spindle pole-associated 1-like
169	0.000319415	0.452977	0.304	0.177	1	Reconstitution	Bpl_scaf_35987-1.14	2069	-	K04598	EGF, latrophilin and seven transmembrane domain-containing 1-like
170	0.000332119	0.480907	0.385	0.258	1	Reconstitution	Bpl_scaf_45124-0.16	411	GO:0004478,GO:0005524,GO:0006556,GO:0006730,GO:0046872	K00789	S-adenosylmethionine synthase isoform type-2-like isoform X1
171	0.000422618	0.693146	0.37	0.231	1	Reconstitution	Bpl_scaf_14775-0.3	464	-	-	PREDICTED: uncharacterized protein LOC105324435 isoform X10
172	0.000454765	0.504994	0.333	0.199	1	Reconstitution	Bpl_scaf_60249-2.37	894	-	-	poly [ADP-ribose] polymerase 14-like isoform X1
173	0.00054958	0.44474	0.437	0.285	1	Reconstitution	Bpl_scaf_724-3.6	101	-	-	---NA---
174	0.000554596	0.444747	0.641	0.554	1	Reconstitution	Bpl_scaf_64340-0.2	415	GO:0005509,GO:0005783,GO:0006457,GO:0051082	K08057	calreticulin
175	0.000723735	0.500813	0.267	0.14	1	Reconstitution	Bpl_scaf_55014-1.1	140	-	-	---NA---
176	0.00107089	0.461319	0.444	0.312	1	Reconstitution	Bpl_scaf_17465-2.8	1438	-	K19719	collagen alpha-1(II) chain isoform X1
177	0.00173309	0.441457	0.585	0.489	1	Reconstitution	Bpl_scaf_31275-3.9	3915	GO:0003341,GO:0003777,GO:0005509,GO:0005524,GO:0005858,GO:0008152,GO:0016887	K10408	dynein heavy chain 7, axonemal-like
178	0.00466602	0.505651	0.633	0.57	1	Reconstitution	Bpl_scaf_57017-0.4	1446	GO:0005391,GO:0005524,GO:0006813,GO:0008152,GO:0016021,GO:0035725,GO:0046872	K01539	sodium potassium-transporting ATPase subunit alpha-like
179	2.81211e-62	3.23355	0.942	0.278	3.81153e-58	Starvation	Bpl_scaf_22849-1.5	139	-	-	---NA---
180	5.7953e-43	3.97763	0.942	0.616	7.85495e-39	Starvation	Bpl_scaf_17778-1.17	4627	GO:0003777,GO:0003779,GO:0005524,GO:0007018,GO:0016301,GO:0016310,GO:0016887,GO:0030286	K10408	dynein heavy chain 10, axonemal-like isoform X1
181	9.86163e-42	1.44426	0.649	0.07	1.33664e-37	Starvation	Bpl_scaf_43157-0.0	83	GO:0004833,GO:0019441,GO:0019442,GO:0020037,GO:0046872,GO:0055114	-	tryptophan 2,3-dioxygenase-like
182	8.45824e-40	1.37823	0.532	0.017	1.14643e-35	Starvation	Bpl_scaf_37149-0.2	972	-	-	PREDICTED: uncharacterized protein LOC105332139
183	2.89388e-38	1.67059	0.721	0.159	3.92237e-34	Starvation	Bpl_scaf_62453-0.8	70	-	-	conserved hypothetical protein, fragment
184	5.22906e-35	1.17086	0.435	0	7.08747e-31	Starvation	Bpl_scaf_17128-9.0	103	-	-	---NA---
185	4.35554e-30	0.925085	0.506	0.053	5.90349e-26	Starvation	Bpl_scaf_22849-0.1	452	-	-	RNA-directed DNA polymerase from mobile element jockey-like
186	3.009e-25	1.61977	0.831	0.371	4.0784e-21	Starvation	Bpl_scaf_19166-1.14	405	-	-	PREDICTED: uncharacterized protein LOC105328034
187	5.23223e-24	0.728883	0.305	0	7.09176e-20	Starvation	Bpl_scaf_715-0.1	169	-	-	---NA---
188	9.13163e-24	2.1216	0.636	0.209	1.2377e-19	Starvation	Bpl_scaf_45750-0.6	509	GO:0000922,GO:0005815,GO:0007020	K16570	gamma-tubulin complex component 3 homolog
189	1.1713e-21	0.616214	0.351	0.026	1.58757e-17	Starvation	Bpl_scaf_15811-1.18	298	GO:0044710	-	tryptophan 2,3-dioxygenase
190	3.31634e-20	1.11545	0.513	0.123	4.49496e-16	Starvation	Bpl_scaf_20338-0.1	110	-	-	, partial
191	7.36317e-20	0.444622	0.253	0	9.98005e-16	Starvation	Bpl_scaf_64146-1.3	74	-	-	---NA---
192	9.61723e-19	0.682079	0.318	0.03	1.30352e-14	Starvation	Bpl_scaf_34471-1.10	221	-	K06721	asialoglyco receptor 1 isoform X1
193	1.91624e-14	1.14577	0.747	0.384	2.59727e-10	Starvation	Bpl_scaf_25425-0.8	130	-	-	---NA---
194	1.34786e-13	1.18396	0.662	0.338	1.82689e-09	Starvation	Bpl_scaf_63069-1.6	95	-	-	---NA---
195	1.90247e-13	0.667957	0.578	0.238	2.57861e-09	Starvation	Bpl_scaf_10745-0.1	551	-	-	---NA---
196	2.56567e-12	1.02579	0.669	0.334	3.47752e-08	Starvation	Bpl_scaf_63069-0.3	130	-	-	---NA---
197	3.63081e-12	0.709339	0.416	0.136	4.92119e-08	Starvation	Bpl_scaf_36437-0.3	51	-	-	---NA---
198	4.48569e-12	1.68276	0.318	0.076	6.0799e-08	Starvation	Bpl_scaf_43116-1.54	391	-	-	---NA---
199	1.72342e-11	0.517866	0.636	0.384	2.33592e-07	Starvation	Bpl_scaf_52780-3.13	483	-	-	hemicentin-1-like isoform X1
200	1.84997e-11	0.55194	0.39	0.119	2.50745e-07	Starvation	Bpl_scaf_55424-0.10	196	GO:0000786,GO:0003677,GO:0005634,GO:0006334	K11275	histone H1-delta-like
201	1.48604e-10	0.418983	0.344	0.093	2.01417e-06	Starvation	Bpl_scaf_26321-0.21	726	-	-	von Willebrand factor A domain-containing 7-like isoform X2
202	1.71437e-10	1.11316	0.403	0.152	2.32366e-06	Starvation	Bpl_scaf_60605-0.12	636	GO:0016740	K00939	adenylate kinase isoenzyme 5-like isoform X1
203	2.90109e-10	0.740832	0.909	0.762	3.93214e-06	Starvation	Bpl_scaf_15294-6.19	4007	GO:0005543	K06115	spectrin beta chain, non-erythrocytic 5-like isoform X2
204	3.84856e-10	0.423888	0.26	0.056	5.21634e-06	Starvation	Bpl_scaf_44832-4.1	2185	-	-	, partial
205	7.77403e-10	0.582259	0.481	0.222	1.05369e-05	Starvation	Bpl_scaf_32409-2.44	780	GO:0008233	K08585	calpain-2 catalytic subunit-like
206	1.37467e-09	0.516505	0.351	0.113	1.86322e-05	Starvation	Bpl_scaf_7408-7.10	799	-	-	cAMP-dependent kinase regulatory subunit
207	2.13986e-09	0.423699	0.429	0.238	2.90037e-05	Starvation	Bpl_scaf_32514-0.31	114	-	-	---NA---
208	4.26441e-09	0.725999	0.416	0.169	5.77998e-05	Starvation	Bpl_scaf_25165-3.8	283	-	-	caspase
209	5.26346e-09	0.668189	0.539	0.262	7.13409e-05	Starvation	Bpl_scaf_52620-0.8	314	-	-	---NA---
210	6.89103e-09	0.895314	0.831	0.656	9.34011e-05	Starvation	Bpl_scaf_25972-1.4	89	-	-	hypothetical protein CGI_10021602
211	5.36555e-08	0.60193	0.331	0.116	0.000727246	Starvation	Bpl_scaf_52188-1.15	414	GO:0016020	-	deleted in malignant brain tumors 1 -like
212	2.14463e-07	0.422131	0.253	0.079	0.00290683	Starvation	Bpl_scaf_8097-0.13	334	-	-	---NA---
213	8.37967e-07	0.419354	0.383	0.169	0.0113578	Starvation	Bpl_scaf_44653-3.24	782	-	-	baculoviral IAP repeat-containing 7-B-like isoform X1
214	1.18697e-06	0.4413	0.929	0.825	0.0160882	Starvation	Bpl_scaf_63069-1.25	363	-	-	---NA---
215	1.89843e-06	0.446233	0.357	0.156	0.0257314	Starvation	Bpl_scaf_3745-0.10	412	-	-	cell surface
216	7.38488e-06	0.628814	0.292	0.129	0.100095	Starvation	Bpl_scaf_15410-0.9	377	-	-	MAM and LDL-receptor class A domain-containing 2-like
217	1.12186e-05	0.558757	0.312	0.146	0.152056	Starvation	Bpl_scaf_63539-1.16	154	-	-	hypothetical protein NEMVEDRAFT_v1g248679
218	1.12275e-05	0.536171	0.721	0.543	0.152178	Starvation	Bpl_scaf_50772-1.17	1151	-	K05702	afadin-like isoform X2
219	3.79136e-05	0.414783	0.526	0.328	0.513881	Starvation	Bpl_scaf_38078-4.6	2597	-	-	actin-like isoform X2
220	0.000118946	0.417528	0.565	0.371	1	Starvation	Bpl_scaf_5539-1.27	178	-	-	tubulin polymerization-promoting family member 3-like
221	0.000420769	0.5469	0.591	0.457	1	Starvation	Bpl_scaf_3489-0.37	451	GO:0003924,GO:0005200,GO:0005525,GO:0005737,GO:0005874,GO:0007017,GO:0008152,GO:0051258	K07374	tubulin alpha-1A chain

[truncated: 10 more sheets: Supplementary File 1k, Supplementary File 1l, Supplementary File 1m, Supplementary File 1n, Supplementary File 1o, Supplementary File 1p, Supplementary File 1q, Supplementary File 1r, Supplementary File 1s, Supplementary File 1t]
